# Supplementary material for: Efficacy and Cost-Effectiveness of VATS Versus Chest Tube Drainage in First-Episode Primary Spontaneous Pneumothorax With Blebs: A Propensity Score-Matched Retrospective Study
Source: Research Square preprint supplement (doi:10.21203/rs.3.rs-7363743/v1), 2025-08-18
Supplement: Supplementary file 1 [file 684efcd161b74045b40eaf39.xlsx]

## Sheet: Monte Carlo simulations
Discount Rate 0%				Discount Rate 3%				Discount Rate 6%
ΔCost	ΔQALY	per recurrence avoided	ICER	Random DR	ΔCost	ΔQALY	ICER	Random DR	ΔCost	ΔQALY	ICER
530328	3.24386	9	163487	0.0411985	433388	2.65091	163487	0.0672114	383083	2.34321	163487
740457	3.95937	17	187014	0.035379	622305	3.32759	187014	0.0654561	740457	3.95937	187014
861710	3.50165	10	246087	0.0248667	762122	3.09696	246087	0.0530215	861710	3.50165	246087
641385	3.95848	6	162028	0.0223417	574300	3.54444	162028	0.0589921	641385	3.95848	162028
637910	2.88872	9	220828	0.028494	554308	2.51013	220828	0.0421118	637910	2.88872	220828
604286	4.05402	10	149059	0.0132584	565773	3.79563	149059	0.0506361	604286	4.05402	149059
563050	4.14774	14	135749	0.0323703	480142	3.53699	135749	0.0680577	563050	4.14774	135749
506602	3.60104	20	140682	0.00436449	495690	3.52347	140682	0.0605928	506602	3.60104	140682
866363	2.53252	10	342095	0.0074726	834706	2.43998	342095	0.0586516	866363	2.53252	342095
676644	3.21348	23	210564	0.0312621	580116	2.75505	210564	0.0644589	676644	3.21348	210564
580962	3.28089	10	177075	0.0240684	515825	2.91304	177075	0.0652002	580962	3.28089	177075
431754	4.17995	10	103292	0.0305901	371370	3.59535	103292	0.0524439	431754	4.17995	103292
642180	3.59957	16	178404	0.0314321	550115	3.08353	178404	0.0686446	642180	3.59957	178404
726644	3.21453	15	226050	0.0187646	662144	2.9292	226050	0.0726866	726644	3.21453	226050
494319	4.2251	10	116996	0.0304045	425568	3.63746	116996	0.0803026	494319	4.2251	116996
526467	3.45218	9	152503	0.0265138	461899	3.02879	152503	0.039525	526467	3.45218	152503
723487	2.57279	4	281208	0.0459821	577843	2.05486	281208	0.0597079	723487	2.57279	281208
456913	3.77228	11	121124	0.0274006	399148	3.29538	121124	0.0567256	456913	3.77228	121124
803329	3.46123	11	232094	0.0525985	621698	2.67865	232094	0.0624364	803329	3.46123	232094
483654	4.48501	13	107838	0.037394	402546	3.73289	107838	0.0511116	483654	4.48501	107838
540938	4.66776	14	115888	0.0275655	472171	4.07438	115888	0.0533081	540938	4.66776	115888
518239	4.5155	18	114769	0.047363	411191	3.58278	114769	0.048286	518239	4.5155	114769
555977	3.94057	11	141090	0.0226645	497039	3.52285	141090	0.0649398	555977	3.94057	141090
584019	4.10179	14	142382	0.0119978	550211	3.86434	142382	0.0484659	584019	4.10179	142382
838682	3.63065	13	231000	0.0304802	721770	3.12454	231000	0.0658578	838682	3.63065	231000
766903	4.07709	21	188100	0.0229979	684489	3.63896	188100	0.0621523	766903	4.07709	188100
542334	3.68834	15	147040	0.0236468	482521	3.28156	147040	0.069505	542334	3.68834	147040
595901	3.8855	10	153365	0.0251605	526278	3.43153	153365	0.0732738	595901	3.8855	153365
590395	3.85125	10	153300	0.0231071	526668	3.43555	153300	0.0661194	590395	3.85125	153300
713541	3.73067	12	191264	0.0314717	611129	3.19522	191264	0.0754931	713541	3.73067	191264
643023	2.69997	9	238160	0.0338109	544529	2.2864	238160	0.0592878	643023	2.69997	238160
507418	3.40621	8	148969	0.0371394	422844	2.83847	148969	0.0620984	507418	3.40621	148969
479048	4.53511	13	105631	0.0208307	432126	4.0909	105631	0.0560253	479048	4.53511	105631
576495	3.82057	7	150893	0.0287029	500433	3.31649	150893	0.0687349	576495	3.82057	150893
629676	3.89762	16	161554	0.0344093	531686	3.29107	161554	0.062477	629676	3.89762	161554
524010	3.84647	12	136231	0.0413078	428000	3.14171	136231	0.0572008	524010	3.84647	136231
954467	4.12416	15	231433	0.0401981	783755	3.38653	231433	0.0648274	954467	4.12416	231433
700776	3.65482	9	191740	0.0290007	607437	3.16802	191740	0.0408921	700776	3.65482	191740
451548	3.17815	10	142079	0.0291347	391150	2.75305	142079	0.0619501	451548	3.17815	142079
451311	3.37208	14	133838	0.023077	402656	3.00854	133838	0.0600823	451311	3.37208	133838
932725	3.94228	13	236595	0.0236522	829834	3.5074	236595	0.0559019	932725	3.94228	236595
524977	3.82953	9	137087	0.051636	408144	2.97727	137087	0.0666795	524977	3.82953	137087
950014	4.53919	13	209292	0.0220639	851805	4.06994	209292	0.0545409	950014	4.53919	209292
544061	2.69052	13	202214	0.0227995	486066	2.40372	202214	0.0497629	544061	2.69052	202214
790046	3.08081	7	256440	0.0203125	714474	2.78612	256440	0.0584515	790046	3.08081	256440
661376	5.05659	7	130795	0.0269082	579149	4.42792	130795	0.0535875	661376	5.05659	130795
664349	3.82746	13	173575	0.0145189	618153	3.56131	173575	0.0545124	664349	3.82746	173575
707320	3.69208	10	191578	0.0503164	553369	2.88849	191578	0.0607986	707320	3.69208	191578
592511	5.07391	5	116776	0.0301254	510794	4.37414	116776	0.0827615	592511	5.07391	116776
669661	3.1157	17	214931	0.0281818	582781	2.71148	214931	0.0716494	669661	3.1157	214931
587490	3.87744	16	151515	0.0400389	482784	3.18638	151515	0.0580319	587490	3.87744	151515
464003	3.10806	14	149290	0.0276253	404899	2.71216	149290	0.0697141	464003	3.10806	149290
392144	3.12594	11	125448	0.0324069	334342	2.66518	125448	0.0644956	392144	3.12594	125448
746420	4.29092	17	173953	0.0381468	618998	3.55842	173953	0.0471889	746420	4.29092	173953
767998	4.29169	10	178950	0.0423831	624055	3.48731	178950	0.0574714	767998	4.29169	178950
504979	3.41028	12	148075	0.0357364	423670	2.86117	148075	0.0408458	504979	3.41028	148075
616804	3.15179	15	195700	0.0152444	571866	2.92216	195700	0.0577991	616804	3.15179	195700
696757	3.41846	19	203822	0.042944	564646	2.77029	203822	0.0713129	696757	3.41846	203822
400289	2.54719	13	157149	0.0376988	332672	2.11693	157149	0.0586022	400289	2.54719	157149
678723	3.61161	13	187928	0.0311731	582149	3.09773	187928	0.0615662	678723	3.61161	187928
483713	3.67451	13	131640	0.0410374	395599	3.00516	131640	0.0785001	483713	3.67451	131640
480737	4.18565	9	114854	0.0233146	428412	3.73007	114854	0.0481675	480737	4.18565	114854
538791	4.45071	10	121057	0.0132648	504436	4.16691	121057	0.0655733	538791	4.45071	121057
467513	3.65336	10	127968	0.028337	406553	3.17699	127968	0.0620994	467513	3.65336	127968
542741	4.08708	12	132794	0.0221497	486429	3.66303	132794	0.064578	542741	4.08708	132794
570308	4.07676	9	139893	0.028726	495007	3.53848	139893	0.0599562	570308	4.07676	139893
740035	4.30503	12	171900	0.0451995	593276	3.45128	171900	0.0784405	740035	4.30503	171900
811668	3.35508	19	241922	0.01899	738803	3.05389	241922	0.0686667	811668	3.35508	241922
565649	3.04251	15	185915	0.0371794	471278	2.53491	185915	0.0576591	565649	3.04251	185915
452909	4.75212	8	95306.7	0.0155699	419239	4.39884	95306.7	0.068069	452909	4.75212	95306.7
492357	3.53558	6	139258	0.0127071	462233	3.31927	139258	0.0414047	492357	3.53558	139258
763709	4.42074	12	172756	0.0328241	649825	3.76151	172756	0.0657622	763709	4.42074	172756
546188	3.48696	13	156637	0.0243993	484168	3.09101	156637	0.068418	546188	3.48696	156637
572567	3.20944	15	178401	0.0304698	492776	2.76219	178401	0.0610124	572567	3.20944	178401
623795	4.29415	7	145266	0.0191818	567262	3.90498	145266	0.0704756	623795	4.29415	145266
457290	3.56187	16	128385	0.028925	396528	3.08858	128385	0.0723534	457290	3.56187	128385
646612	3.87545	9	166848	0.0262647	567998	3.40428	166848	0.0647864	646612	3.87545	166848
561704	3.43938	13	163315	0.0223249	502994	3.0799	163315	0.0464913	561704	3.43938	163315
463859	3.02768	11	153206	0.0337595	392906	2.56456	153206	0.0630592	463859	3.02768	153206
663150	3.29433	11	201300	0.038002	550327	2.73386	201300	0.046096	663150	3.29433	201300
541300	4.35016	17	124432	0.0216897	486231	3.9076	124432	0.0549215	541300	4.35016	124432
584927	3.74395	14	156233	0.0270892	511754	3.27559	156233	0.0679204	584927	3.74395	156233
438266	3.9651	12	110531	0.0231961	390790	3.53557	110531	0.0509056	438266	3.9651	110531
703541	3.71697	16	189278	0.018462	642045	3.39207	189278	0.0574433	703541	3.71697	189278
613962	3.11312	10	197217	0.0444378	494002	2.50486	197217	0.0641586	613962	3.11312	197217
379967	4.54921	16	83523.8	0.0360582	318292	3.81079	83523.8	0.0659932	379967	4.54921	83523.8
533327	3.66104	7	145676	0.0443164	429371	2.94743	145676	0.0558033	533327	3.66104	145676
594273	3.38087	10	175775	0.0179592	543668	3.09298	175775	0.0738315	594273	3.38087	175775
547902	3.57408	11	153299	0.0333115	465100	3.03395	153299	0.0867758	547902	3.57408	153299
550541	3.1121	17	176904	0.06	411397	2.32554	176904	0.0614092	550541	3.1121	176904
170450	3.20327	11	53211.2	0.0426604	138319	2.59944	53211.2	0.0493354	170450	3.20327	53211.2
551299	4.16129	8	132483	0.0304373	474547	3.58196	132483	0.0527337	551299	4.16129	132483
637703	2.9643	15	215128	0.030375	549088	2.55238	215128	0.0766965	637703	2.9643	215128
551853	3.00115	9	183880	0.0325092	470277	2.55752	183880	0.0482593	551853	3.00115	183880
546257	2.99736	13	182246	0.00882145	522788	2.86858	182246	0.053806	546257	2.99736	182246
447019	3.73086	10	119817	0.0450937	358550	2.99249	119817	0.0548169	447019	3.73086	119817
701892	3.54645	12	197914	0.0442581	565237	2.85598	197914	0.0667526	701892	3.54645	197914
561431	4.87469	18	115173	0.0331997	476843	4.14024	115173	0.0582426	561431	4.87469	115173
594550	2.79763	14	212519	0.0385209	492166	2.31587	212519	0.0630419	594550	2.79763	212519
656564	3.7309	16	175980	0.03091	563862	3.20413	175980	0.0772044	656564	3.7309	175980
334423	3.45547	9	96780.8	0.0311026	286937	2.96481	96780.8	0.0516699	334423	3.45547	96780.8
560910	3.31137	13	169389	0.0327652	477403	2.81838	169389	0.0576818	560910	3.31137	169389
662936	3.79128	16	174858	0.0321496	565924	3.23648	174858	0.0820779	662936	3.79128	174858
770627	3.84967	7	200180	0.0182972	703836	3.51602	200180	0.053179	770627	3.84967	200180
535871	3.65306	9	146691	0.0140573	499744	3.40678	146691	0.0623048	535871	3.65306	146691
536862	3.76476	9	142602	0.0176883	491801	3.44876	142602	0.0721553	536862	3.76476	142602
696484	4.40581	8	158083	0.0273065	608711	3.85057	158083	0.0680262	696484	4.40581	158083
613199	3.45798	14	177328	0.0287201	532249	3.00149	177328	0.0610132	613199	3.45798	177328
377278	4.68819	16	80474.2	0.038034	313043	3.88998	80474.2	0.0625361	377278	4.68819	80474.2
414131	3.51984	11	117656	0.0207517	373712	3.17631	117656	0.0640767	414131	3.51984	117656
701015	4.68403	5	149661	0.0486272	552868	3.69415	149661	0.0508064	701015	4.68403	149661
728356	3.82655	4	190343	0.0396591	599638	3.15031	190343	0.0573419	728356	3.82655	190343
592318	3.78932	16	156313	0.0448243	475706	3.0433	156313	0.0604269	592318	3.78932	156313
567850	4.61522	15	123039	0.0395346	467777	3.80187	123039	0.0752436	567850	4.61522	123039
588395	3.99382	9	147326	0.0356634	493828	3.35193	147326	0.0530914	588395	3.99382	147326
735375	3.70182	11	198653	0.0253421	648881	3.26641	198653	0.0707258	735375	3.70182	198653
503258	4.15786	9	121038	0.0147943	467628	3.86349	121038	0.0755842	503258	4.15786	121038
585942	3.95494	17	148155	0.0216316	526482	3.5536	148155	0.0457991	585942	3.95494	148155
669516	3.9787	11	168275	0.0326971	570028	3.38748	168275	0.0690125	669516	3.9787	168275
646648	3.75521	8	172200	0.0371178	538924	3.12964	172200	0.0538101	646648	3.75521	172200
725023	4.26196	13	170115	0.0389956	598802	3.51999	170115	0.061462	725023	4.26196	170115
519718	3.58933	15	144795	0.0208573	468751	3.23734	144795	0.0620407	519718	3.58933	144795
391230	3.23074	9	121096	0.0390216	323080	2.66796	121096	0.0635251	391230	3.23074	121096
524436	4.16183	11	126011	0.0334983	444779	3.52968	126011	0.0679102	524436	4.16183	126011
549084	4.39271	15	124999	0.0389969	453490	3.62795	124999	0.0640372	549084	4.39271	124999
615004	3.6027	13	170706	0.0246647	544464	3.18948	170706	0.0527069	615004	3.6027	170706
400996	4.318	17	92866.1	0.0444559	322619	3.47402	92866.1	0.0475152	400996	4.318	92866.1
583737	4.03608	14	144630	0.0360025	489118	3.38187	144630	0.0660445	583737	4.03608	144630
756046	3.32831	12	227156	0.0347822	637240	2.8053	227156	0.0304368	756046	3.32831	227156
622776	3.05331	10	203967	0.0292781	539098	2.64306	203967	0.0555254	622776	3.05331	203967
396818	3.63124	11	109279	0.0351876	333808	3.05463	109279	0.0395515	396818	3.63124	109279
652786	3.56871	12	182919	0.0165924	601224	3.28683	182919	0.0575847	652786	3.56871	182919
504970	3.90128	14	129437	0.0204376	456387	3.52594	129437	0.0736037	504970	3.90128	129437
460574	4.10532	6	112190	0.0339052	389849	3.47491	112190	0.0628649	460574	4.10532	112190
729372	2.87397	6	253785	0.0416739	594689	2.34328	253785	0.0527237	729372	2.87397	253785
733332	3.47451	7	211061	0.0326032	624645	2.95955	211061	0.0419465	733332	3.47451	211061
594980	3.82681	7	155477	0.0141946	554493	3.5664	155477	0.0493007	594980	3.82681	155477
599153	3.0895	13	193932	0.0315683	512918	2.64483	193932	0.035888	599153	3.0895	193932
546745	4.59328	13	119031	0.0283862	475339	3.99339	119031	0.0598166	546745	4.59328	119031
707608	2.73247	10	258963	0.0290957	613076	2.36742	258963	0.055229	707608	2.73247	258963
670019	3.30982	14	202433	0.0262391	588632	2.90778	202433	0.0616902	670019	3.30982	202433
563712	4.32992	17	130190	0.0355801	473303	3.63548	130190	0.0449765	563712	4.32992	130190
729443	3.9163	15	186258	0.0275107	636883	3.41935	186258	0.0595252	729443	3.9163	186258
553896	3.89082	20	142360	0.0259064	487404	3.42376	142360	0.0503132	553896	3.89082	142360
397959	3.89932	13	102059	0.0335549	337420	3.30614	102059	0.0654496	397959	3.89932	102059
729538	3.86237	12	188883	0.0238431	648457	3.4331	188883	0.0620117	729538	3.86237	188883
607459	3.6582	11	166054	0.0193611	551921	3.32374	166054	0.0614121	607459	3.6582	166054
742594	2.94936	16	251782	0.0292792	642814	2.55306	251782	0.0691734	742594	2.94936	251782
575030	3.65303	10	157412	0.0321464	490890	3.11851	157412	0.0521276	575030	3.65303	157412
758278	3.51084	17	215982	0.0307955	651578	3.01681	215982	0.0790704	758278	3.51084	215982
350683	3.62058	12	96858.5	0.0404569	287604	2.96932	96858.5	0.0545344	350683	3.62058	96858.5
645943	3.61374	12	178746	0.0168781	594086	3.32363	178746	0.0502352	645943	3.61374	178746
621195	3.47626	13	178696	0.0259616	546478	3.05813	178696	0.0763602	621195	3.47626	178696
643554	3.45163	15	186449	0.0323636	548809	2.94348	186449	0.0603804	643554	3.45163	186449
636634	3.90891	11	162867	0.0187792	580082	3.56168	162867	0.0620719	636634	3.90891	162867
577865	3.71826	12	155413	0.0292103	500387	3.21972	155413	0.0674726	577865	3.71826	155413
616437	4.59571	13	134133	0.0244794	546227	4.07227	134133	0.0662971	616437	4.59571	134133
381400	3.53151	11	107999	0.0339401	322778	2.98871	107999	0.0649667	381400	3.53151	107999
533769	3.37211	6	158289	0	533769	3.37211	158289	0.0658803	533769	3.37211	158289
707893	3.39943	13	208239	0.0466828	563497	2.70602	208239	0.0528149	707893	3.39943	208239
677811	3.83856	5	176580	0.0303096	583808	3.3062	176580	0.05267	677811	3.83856	176580
347582	3.52896	12	98494.2	0.0293141	300828	3.05427	98494.2	0.0351447	347582	3.52896	98494.2
592231	3.45042	7	171640	0.030193	510386	2.97358	171640	0.0512231	592231	3.45042	171640
756953	3.28376	14	230514	0.0343812	639243	2.77312	230514	0.0634228	756953	3.28376	230514
436441	3.06128	10	142568	0.0223547	390767	2.74092	142568	0.0517476	436441	3.06128	142568
557272	4.0199	16	138628	0.0405669	456791	3.29508	138628	0.0522638	557272	4.0199	138628
560576	3.39671	9	165035	0.0207236	505934	3.06562	165035	0.0610062	560576	3.39671	165035
600054	3.15652	10	190100	0.0308074	515588	2.7122	190100	0.0369409	600054	3.15652	190100
689444	3.56487	12	193400	0.0339682	583395	3.01653	193400	0.0505425	689444	3.56487	193400
751587	2.7843	7	269937	0.0375412	625105	2.31574	269937	0.0752863	751587	2.7843	269937
756134	3.28739	7	230010	0.0118386	712923	3.09953	230010	0.0421083	756134	3.28739	230010
740419	4.56745	8	162108	0.0213089	666334	4.11044	162108	0.0825931	740419	4.56745	162108
553418	2.91697	11	189724	0.0333733	469642	2.4754	189724	0.071508	553418	2.91697	189724
572746	4.33647	14	132077	0.0285791	497478	3.76658	132077	0.0707846	572746	4.33647	132077
700229	4.41802	12	158494	0.0322096	597586	3.7704	158494	0.0528369	700229	4.41802	158494
573216	3.41698	10	167755	0.0358382	480683	2.86538	167755	0.0595515	573216	3.41698	167755
538060	5.19488	13	103575	0.0284091	467736	4.51592	103575	0.0615807	538060	5.19488	103575
647036	4.38025	13	147717	0.0417452	527377	3.57019	147717	0.0457487	647036	4.38025	147717
457544	3.60257	17	127005	0.0229271	408516	3.21654	127005	0.0493121	457544	3.60257	127005
574507	4.06318	12	141394	0.0151353	532937	3.76917	141394	0.0734915	574507	4.06318	141394
673927	3.78009	9	178283	0.0405712	552400	3.09844	178283	0.0428457	673927	3.78009	178283
611014	3.0446	7	200688	0.0348709	514779	2.56507	200688	0.0612271	611014	3.0446	200688
723848	3.19113	9	226831	0.0300148	624353	2.7525	226831	0.0653162	723848	3.19113	226831
599396	4.0179	9	149182	0.0537723	461297	3.09218	149182	0.0532816	599396	4.0179	149182
649840	2.31202	12	281070	0.0248254	574854	2.04523	281070	0.0762839	649840	2.31202	281070
626612	3.39533	22	184551	0.0363464	524172	2.84026	184551	0.0674649	626612	3.39533	184551
477325	4.14253	12	115226	0.0192908	433834	3.76509	115226	0.0524073	477325	4.14253	115226
752890	3.24347	14	232125	0.0396518	619858	2.67036	232125	0.053881	752890	3.24347	232125
646048	2.84718	7	226908	0.0337919	547141	2.41129	226908	0.0488824	646048	2.84718	226908
923055	4.02685	12	229225	0.0476817	731275	3.1902	229225	0.063208	923055	4.02685	229225
470705	3.35825	6	140164	0.0407031	385580	2.75092	140164	0.0554382	470705	3.35825	140164
443678	3.64076	8	121864	0.0283903	385725	3.1652	121864	0.0460597	443678	3.64076	121864
776280	3.28815	13	236084	0.04648	618534	2.61997	236084	0.0750311	776280	3.28815	236084
548449	3.36015	8	163221	0.0387816	453435	2.77804	163221	0.0693416	548449	3.36015	163221
487738	3.73608	13	130548	0.0235362	434180	3.32583	130548	0.0671733	487738	3.73608	130548
697997	4.46666	5	156268	0.0230788	622742	3.98509	156268	0.0564105	697997	4.46666	156268
758042	3.49606	12	216828	0.0313011	649780	2.99676	216828	0.0637531	758042	3.49606	216828
599082	3.05963	7	195802	0.0216353	538278	2.7491	195802	0.0661045	599082	3.05963	195802
536762	4.50955	12	119028	0.0239591	476835	4.00609	119028	0.0464776	536762	4.50955	119028
509548	4.90029	10	103983	0.0490739	401010	3.85648	103983	0.0522619	509548	4.90029	103983
677198	4.08917	9	165608	0.0365765	565860	3.41687	165608	0.0665847	677198	4.08917	165608
675979	3.12842	12	216077	0.0227569	604048	2.79552	216077	0.0429928	675979	3.12842	216077
538480	3.71925	11	144782	0.0393339	444012	3.06676	144782	0.0676154	538480	3.71925	144782
524344	2.75145	12	190570	0.0358398	439697	2.30727	190570	0.0599851	524344	2.75145	190570
607714	3.37212	10	180217	0.028451	528179	2.93079	180217	0.0752368	607714	3.37212	180217
541516	3.24062	14	167102	0.0456984	433091	2.59177	167102	0.0321667	541516	3.24062	167102
678887	4.2597	18	159374	0.0299333	585803	3.67565	159374	0.065825	678887	4.2597	159374
529869	4.05471	15	130680	0.0389503	437718	3.34954	130680	0.0433529	529869	4.05471	130680
432202	3.69785	12	116879	0.0247525	382465	3.27231	116879	0.0711719	432202	3.69785	116879
625690	3.59716	8	173940	0.0254413	551830	3.17253	173940	0.0544904	625690	3.59716	173940
751194	3.17633	12	236498	0.0336008	636778	2.69253	236498	0.0550643	751194	3.17633	236498
728762	3.93435	12	185230	0.0208233	657404	3.54912	185230	0.0608979	728762	3.93435	185230
593029	3.67323	9	161446	0.0379205	492329	3.04949	161446	0.0635442	593029	3.67323	161446
580024	3.91914	20	147998	0.0548614	444088	3.00064	147998	0.057839	580024	3.91914	147998
793607	3.32892	13	238398	0.0247781	702193	2.94547	238398	0.0621339	793607	3.32892	238398
287092	4.42971	11	64810.6	0.0219442	257564	3.9741	64810.6	0.0473906	287092	4.42971	64810.6
404585	3.29259	12	122877	0.0447288	325081	2.64557	122877	0.0628074	404585	3.29259	122877
828896	4.12979	10	200711	0.0242688	735242	3.66318	200711	0.058033	828896	4.12979	200711
391799	4.5809	10	85528.8	0.0110289	370890	4.33644	85528.8	0.0714764	391799	4.5809	85528.8
687183	4.43348	13	154999	0.029983	592819	3.82467	154999	0.0469329	687183	4.43348	154999
492700	3.04679	12	161711	0.0500096	386025	2.38713	161711	0.0732997	492700	3.04679	161711
372944	3.28842	9	113411	0.0297334	322121	2.8403	113411	0.0585216	372944	3.28842	113411
675467	3.63618	14	185763	0.0381729	560088	3.01507	185763	0.0680862	675467	3.63618	185763
861582	3.79217	12	227200	0.0129055	808076	3.55667	227200	0.0651939	861582	3.79217	227200
354869	4.51077	16	78671.6	0.0475134	281365	3.57645	78671.6	0.0831596	354869	4.51077	78671.6
637208	3.47706	13	183261	0.017639	583865	3.18598	183261	0.0778449	637208	3.47706	183261
418432	4.26946	10	98005.9	0.0252233	369431	3.76947	98005.9	0.0725056	418432	4.26946	98005.9
646283	3.40333	18	189898	0.0311777	554313	2.91901	189898	0.0459216	646283	3.40333	189898
643385	3.09368	17	207967	0.0283391	559486	2.69026	207967	0.0654578	643385	3.09368	207967
776281	4.05358	16	191505	0.0350572	653427	3.41207	191505	0.0518928	776281	4.05358	191505
538427	4.32713	18	124431	0.0194839	488906	3.92914	124431	0.0470646	538427	4.32713	124431
690070	2.94615	12	234227	0.0280557	600910	2.5655	234227	0.0588952	690070	2.94615	234227
868051	3.92036	11	221421	0.0296448	750081	3.38757	221421	0.0662239	868051	3.92036	221421
607174	3.98027	10	152546	0.0457856	485400	3.182	152546	0.0509648	607174	3.98027	152546
583338	4.61515	16	126396	0.0429308	472762	3.74032	126396	0.0482709	583338	4.61515	126396
557130	3.66823	10	151880	0.0202194	504067	3.31885	151880	0.0493021	557130	3.66823	151880
526482	4.18571	16	125781	0.0110856	498246	3.96122	125781	0.06554	526482	4.18571	125781
504674	3.81224	13	132383	0.0333338	428359	3.23576	132383	0.0486574	504674	3.81224	132383
671539	4.02281	11	166933	0.0412623	548618	3.28646	166933	0.0423155	671539	4.02281	166933
603154	3.12822	7	192811	0.0236317	536673	2.78342	192811	0.0681785	603154	3.12822	192811
586723	4.04754	8	144958	0.0336636	497207	3.43001	144958	0.0714865	586723	4.04754	144958
674468	4.69789	16	143568	0.0351262	567538	3.95309	143568	0.0445123	674468	4.69789	143568
631198	4.51519	9	139795	0.0277575	550443	3.93752	139795	0.0719435	631198	4.51519	139795
556484	3.57465	10	155675	0.045957	444512	2.85538	155675	0.0589201	556484	3.57465	155675
576243	3.63671	14	158452	0.0226446	515208	3.2515	158452	0.0688428	576243	3.63671	158452
492088	3.60304	20	136576	0.0419339	400721	2.93405	136576	0.0682996	492088	3.60304	136576
538863	3.54602	11	151963	0.0381437	446880	2.94072	151963	0.076894	538863	3.54602	151963
503939	2.76031	11	182566	0.0296017	435544	2.38568	182566	0.0444535	503939	2.76031	182566
510486	2.78702	14	183166	0.0459352	407812	2.22646	183166	0.0582765	510486	2.78702	183166
438704	3.50576	8	125138	0.0336407	371812	2.97122	125138	0.0518789	438704	3.50576	125138
485395	3.00695	11	161425	0.0438518	391652	2.42623	161425	0.045538	485395	3.00695	161425
530181	3.87381	16	136863	0.0338594	448866	3.27967	136863	0.0675912	530181	3.87381	136863
591870	3.39517	13	174327	0.0313481	507224	2.90961	174327	0.0563881	591870	3.39517	174327
502787	3.40317	11	147741	0.0156889	465136	3.14833	147741	0.0595962	502787	3.40317	147741
769117	2.77505	8	277154	0.0271599	672670	2.42706	277154	0.073064	769117	2.77505	277154
679969	3.51681	15	193348	0.0211022	612552	3.16813	193348	0.0642934	679969	3.51681	193348
569654	3.93742	12	144677	0.0244523	504839	3.48941	144677	0.043131	569654	3.93742	144677
622242	3.2086	14	193930	0.0266698	545513	2.81294	193930	0.0506678	622242	3.2086	193930
366576	3.086	15	118787	0.00901277	350494	2.95061	118787	0.0625791	366576	3.086	118787
474696	3.90322	15	121616	0.017054	436210	3.58677	121616	0.0677687	474696	3.90322	121616
496613	4.13918	10	119979	0.0233711	442438	3.68764	119979	0.044651	496613	4.13918	119979
845727	3.41839	17	247405	0.0219319	758788	3.06699	247405	0.0691615	845727	3.41839	247405
539992	4.21523	14	128105	0.0429894	437510	3.41524	128105	0.0782645	539992	4.21523	128105
368434	4.45218	9	82753.6	0.0517998	286216	3.45865	82753.6	0.0625894	368434	4.45218	82753.6
811773	3.63819	18	223126	0.0386086	671699	3.01041	223126	0.0631939	811773	3.63819	223126
324007	4.04543	14	80092.3	0.0388711	267761	3.34315	80092.3	0.051992	324007	4.04543	80092.3
617543	3.55532	13	173695	0.0245091	547127	3.14992	173695	0.0474999	617543	3.55532	173695
500820	3.32859	14	150460	0.0253183	441965	2.93743	150460	0.0492834	500820	3.32859	150460
470486	4.15402	15	113260	0.0299825	405879	3.5836	113260	0.0510044	470486	4.15402	113260
705985	3.76631	9	187447	0.0310035	606031	3.23307	187447	0.0641054	705985	3.76631	187447
516777	3.42014	8	151098	0.0303661	444985	2.94501	151098	0.0617567	516777	3.42014	151098
611469	4.0134	14	152357	0.0252209	539868	3.54344	152357	0.053212	611469	4.0134	152357
367884	2.81954	16	130477	0.0355921	308864	2.3672	130477	0.0566949	367884	2.81954	130477
701982	3.99331	16	175789	0.0247245	621284	3.53425	175789	0.0761961	701982	3.99331	175789
457463	3.24691	14	140892	0.0363095	382744	2.71658	140892	0.0648221	457463	3.24691	140892
703759	3.17066	10	221960	0.0362091	589097	2.65407	221960	0.0501308	703759	3.17066	221960
396683	2.90225	11	136681	0.0389436	327705	2.39759	136681	0.0642125	396683	2.90225	136681
622205	4.15564	15	149725	0.0499862	487546	3.25627	149725	0.0421023	622205	4.15564	149725
606938	3.93357	9	154297	0.0351009	510777	3.31034	154297	0.0715528	606938	3.93357	154297
565888	3.18983	17	177404	0.0319004	483661	2.72633	177404	0.0612885	565888	3.18983	177404
899615	2.82914	10	317982	0.0379156	746873	2.34879	317982	0.0549461	899615	2.82914	317982
498805	3.43715	8	145122	0.0310472	428093	2.94988	145122	0.0699117	498805	3.43715	145122
371125	3.32857	13	111497	0.0342957	313543	2.81212	111497	0.0779895	371125	3.32857	111497
600446	4.60612	15	130358	0.0286642	521322	3.99914	130358	0.0534505	600446	4.60612	130358
426322	2.91682	9	146160	0.0311751	365659	2.50177	146160	0.0694851	426322	2.91682	146160
479461	4.44362	14	107899	0.0302566	413072	3.82833	107899	0.0677965	479461	4.44362	107899
516710	3.58501	13	144131	0.0370822	430706	2.98831	144131	0.0649772	516710	3.58501	144131
649464	3.28693	12	197590	0.0335805	550597	2.78656	197590	0.0563635	649464	3.28693	197590
755315	3.73718	14	202108	0.0302051	650893	3.22052	202108	0.0616847	755315	3.73718	202108
610739	3.01355	10	202665	0.023155	544689	2.68764	202665	0.0506038	610739	3.01355	202665
498415	4.03	10	123676	0.0354956	418649	3.38504	123676	0.0493043	498415	4.03	123676
448447	4.73874	11	94634.1	0.0263583	393746	4.16072	94634.1	0.070793	448447	4.73874	94634.1
484116	3.99602	10	121150	0.0402361	397457	3.28071	121150	0.0654384	484116	3.99602	121150
583258	3.45761	6	168688	0.0468314	463957	2.75038	168688	0.046569	583258	3.45761	168688
562883	4.038	9	139396	0.0294985	486732	3.49171	139396	0.0640639	562883	4.038	139396
577220	3.37976	11	170787	0.0316281	493998	2.89248	170787	0.0610283	577220	3.37976	170787
813436	3.46412	6	234818	0.016522	749444	3.1916	234818	0.0719562	813436	3.46412	234818
537637	3.77962	17	142246	0.0122695	505835	3.55605	142246	0.0621468	537637	3.77962	142246
693121	2.58536	9	268095	0.0374644	576691	2.15107	268095	0.0638379	693121	2.58536	268095
590708	4.09701	15	144180	0.0141241	550703	3.81954	144180	0.069405	590708	4.09701	144180
678897	3.43611	7	197577	0.0484835	535791	2.71181	197577	0.0567633	678897	3.43611	197577
721351	3.52163	10	204835	0.0424395	585993	2.86081	204835	0.0603318	721351	3.52163	204835
533250	4.4674	14	119365	0.0297244	460602	3.85878	119365	0.0492951	533250	4.4674	119365
639542	3.86255	15	165575	0.0432646	517484	3.12538	165575	0.0569734	639542	3.86255	165575
578177	5.12072	10	112909	0.00824752	554913	4.91468	112909	0.0510252	578177	5.12072	112909
666379	3.34989	10	198926	0.0265849	584449	2.93803	198926	0.0632654	666379	3.34989	198926
408020	3.6854	11	110713	0.0157002	377445	3.40923	110713	0.0621682	408020	3.6854	110713
631680	3.37555	10	187134	0.0176773	578691	3.09239	187134	0.0540531	631680	3.37555	187134
412188	3.4952	12	117930	0.0148246	382949	3.24726	117930	0.0489838	412188	3.4952	117930
607626	3.80903	16	159522	0.0179638	555871	3.4846	159522	0.0471042	607626	3.80903	159522
851771	2.54236	14	335032	0.0283387	740699	2.21083	335032	0.0497693	851771	2.54236	335032
708300	3.23474	9	218967	0.0436941	571941	2.612	218967	0.0619127	708300	3.23474	218967
558107	4.2102	10	132561	0.0249446	493418	3.72221	132561	0.055508	558107	4.2102	132561
506074	3.47089	13	145805	0.0320142	432300	2.96492	145805	0.068513	506074	3.47089	145805
358109	2.99334	18	119636	0.0390459	295694	2.47162	119636	0.056017	358109	2.99334	119636
767340	3.361	5	228307	0.0489149	604348	2.64708	228307	0.0541259	767340	3.361	228307
784827	3.42447	10	229182	0.021164	706800	3.08401	229182	0.0636637	784827	3.42447	229182
487081	4.2104	15	115685	0.0289316	422346	3.65082	115685	0.049999	487081	4.2104	115685
330094	4.41928	13	74694.2	0.0357887	276874	3.70677	74694.2	0.0633039	330094	4.41928	74694.2
644891	3.50728	12	183872	0.0336125	546635	2.97291	183872	0.0758271	644891	3.50728	183872
738594	4.25625	14	173532	0.0333994	626707	3.61148	173532	0.0872603	738594	4.25625	173532
827219	3.91526	17	211281	0.0364464	691649	3.2736	211281	0.0722378	827219	3.91526	211281
751710	2.79653	9	268801	0.0241202	667261	2.48236	268801	0.0586286	751710	2.79653	268801
639741	3.0306	13	211094	0.0250394	565329	2.6781	211094	0.0726444	639741	3.0306	211094
512210	3.6445	10	140543	0.0262036	450070	3.20236	140543	0.0633425	512210	3.6445	140543
477281	3.05751	13	156101	0.0209391	430304	2.75656	156101	0.0720952	477281	3.05751	156101
388537	3.63992	16	106743	0.0351787	326855	3.06207	106743	0.0711867	388537	3.63992	106743
502380	3.09669	11	162231	0.01509	466133	2.87326	162231	0.0431569	502380	3.09669	162231
317818	3.82741	12	83037.3	0.0547904	243415	2.9314	83037.3	0.0340611	317818	3.82741	83037.3
532762	4.14138	9	128643	0.0433813	430842	3.34911	128643	0.0540855	532762	4.14138	128643
766087	3.47918	11	220192	0.0231073	683396	3.10363	220192	0.0542347	766087	3.47918	220192
508580	3.32473	12	152969	0.044964	408181	2.6684	152969	0.0602604	508580	3.32473	152969
696039	3.58165	14	194335	0.037248	579723	2.98312	194335	0.0431814	696039	3.58165	194335
511613	4.19493	11	121960	0.0374606	425680	3.49033	121960	0.0586746	511613	4.19493	121960
455849	3.90823	15	116638	0.0183473	416237	3.56863	116638	0.0322698	455849	3.90823	116638
538635	3.00709	14	179122	0.0287618	467434	2.60959	179122	0.0669855	538635	3.00709	179122
596343	4.40447	13	135395	0.045422	477571	3.52724	135395	0.0741658	596343	4.40447	135395
471923	3.16661	16	149031	0.0434131	381583	2.56043	149031	0.0402646	471923	3.16661	149031
431526	4.3182	21	99931.9	0.0245113	382317	3.82577	99931.9	0.0692802	431526	4.3182	99931.9
453127	3.90968	10	115899	0.0326676	385849	3.32919	115899	0.0421659	453127	3.90968	115899
501427	2.27144	16	220753	0.00602123	486600	2.20427	220753	0.0532636	501427	2.27144	220753
737599	2.53053	9	291480	0.0160617	681114	2.33675	291480	0.0637473	737599	2.53053	291480
611047	2.91591	13	209556	0.029222	529090	2.52481	209556	0.0644955	611047	2.91591	209556
799920	4.35076	21	183858	0.0101701	760456	4.13611	183858	0.0431653	799920	4.35076	183858
676165	3.37098	23	200584	0.0389716	558514	2.78444	200584	0.0633988	676165	3.37098	200584
686438	2.707	11	253579	0.0476436	543918	2.14496	253579	0.0698021	686438	2.707	253579
625472	3.42527	15	182605	0.0190088	569270	3.11749	182605	0.0628098	625472	3.42527	182605
718612	4.32293	14	166233	0.0582928	541334	3.25648	166233	0.0641466	718612	4.32293	166233
403020	4.29183	13	93904.1	0.0247317	356677	3.79832	93904.1	0.0651006	403020	4.29183	93904.1
830057	3.22533	8	257356	0.0251906	732968	2.84807	257356	0.0624132	830057	3.22533	257356
752650	3.13095	12	240390	0.043857	607279	2.52622	240390	0.0683514	752650	3.13095	240390
284618	2.3789	14	119643	0.036776	237595	1.98588	119643	0.0500207	284618	2.3789	119643
508846	3.96961	10	128185	0.0313492	436071	3.40188	128185	0.038633	508846	3.96961	128185
609274	4.07283	12	149595	0.0151303	565202	3.77822	149595	0.0689692	609274	4.07283	149595
470268	2.6028	9	180678	0.029014	407605	2.25598	180678	0.0685278	470268	2.6028	180678
566563	2.2232	12	254842	0.0139304	528698	2.07461	254842	0.0573998	566563	2.2232	254842
650038	4.60224	11	141244	0.0312996	557204	3.94498	141244	0.0599209	650038	4.60224	141244
560343	3.22593	13	173700	0.0057865	544409	3.13419	173700	0.0453859	560343	3.22593	173700
689165	4.32176	14	159464	0.00588282	669247	4.19685	159464	0.0778024	689165	4.32176	159464
328087	3.62684	16	90460.8	0.0234323	292209	3.23023	90460.8	0.0634161	328087	3.62684	90460.8
627457	4.08922	3	153441	0.0168073	577285	3.76225	153441	0.0689605	627457	4.08922	153441
720561	3.86895	14	186242	0.0395621	593497	3.1867	186242	0.0685957	720561	3.86895	186242
564113	3.86242	12	146052	0.0318798	482192	3.30152	146052	0.0659404	564113	3.86242	146052
373811	3.85953	9	96854	0.00926168	356971	3.68566	96854	0.0505822	373811	3.85953	96854
632406	3.79314	8	166724	0.0253843	557908	3.3463	166724	0.060359	632406	3.79314	166724
702888	3.6673	11	191663	0.0196179	637821	3.32782	191663	0.0769311	702888	3.6673	191663
632761	4.54849	12	139114	0.0218138	568042	4.08328	139114	0.0604831	632761	4.54849	139114
391144	4.14311	16	94408.4	0.0370696	326060	3.45372	94408.4	0.0505343	391144	4.14311	94408.4
627299	3.24917	11	193065	0.025837	552183	2.8601	193065	0.0691068	627299	3.24917	193065
709744	3.7709	16	188216	0.0431277	574665	3.05322	188216	0.0580262	709744	3.7709	188216
380866	4.85359	18	78471	0.0366061	318202	4.05503	78471	0.0581425	380866	4.85359	78471
697663	3.31995	14	210142	0.0250652	616437	2.93342	210142	0.0495426	697663	3.31995	210142
531651	4.36914	12	121683	0.0522351	412157	3.38713	121683	0.0618024	531651	4.36914	121683
394056	2.57238	11	153187	0.0227351	352162	2.2989	153187	0.0464767	394056	2.57238	153187
334863	3.54423	11	94481.2	0.0514513	260569	2.75789	94481.2	0.0594743	334863	3.54423	94481.2
551546	3.458	11	159499	0.0311591	473100	2.96617	159499	0.0582008	551546	3.458	159499
519831	3.41741	11	152113	0.0253582	458652	3.01522	152113	0.0543235	519831	3.41741	152113
532334	2.77456	12	191862	0.0267185	466581	2.43186	191862	0.0743605	532334	2.77456	191862
430269	3.79521	13	113372	0.0174975	394524	3.47991	113372	0.0428351	430269	3.79521	113372
494455	3.96505	14	124703	0.0218218	443865	3.55937	124703	0.0618831	494455	3.96505	124703
521198	2.88862	13	180432	0.0153964	482864	2.67616	180432	0.0707014	521198	2.88862	180432
452414	3.48295	8	129894	0.0332116	384228	2.95802	129894	0.0545072	452414	3.48295	129894
761788	3.32761	20	228930	0.0491058	599429	2.6184	228930	0.0717192	761788	3.32761	228930
514731	3.53925	17	145435	0.00864958	493036	3.39008	145435	0.0504621	514731	3.53925	145435
615614	3.771	9	163250	0.0311316	528126	3.23508	163250	0.0746799	615614	3.771	163250
480016	4.81768	10	99636.3	0.0244115	425485	4.27038	99636.3	0.0607147	480016	4.81768	99636.3
632521	3.75192	6	168586	0.0316962	541147	3.20992	168586	0.0511333	632521	3.75192	168586
726806	4.14756	11	175237	0.0278985	633385	3.61445	175237	0.0446239	726806	4.14756	175237
765307	4.28973	11	178405	0.0348313	644893	3.61478	178405	0.0573166	765307	4.28973	178405
743429	3.90763	13	190251	0.0337363	629782	3.31028	190251	0.0637827	743429	3.90763	190251
782968	4.51411	16	173449	0.0230661	698595	4.02767	173449	0.0422327	782968	4.51411	173449
539415	3.19855	11	168644	0.0250691	476603	2.8261	168644	0.0717291	539415	3.19855	168644
522535	3.68706	10	141721	0.0356368	438609	3.09487	141721	0.0549888	522535	3.68706	141721
488635	2.82552	12	172936	0.0395766	402441	2.3271	172936	0.0513374	488635	2.82552	172936
529706	3.9759	19	133229	0.0203682	478906	3.5946	133229	0.0801779	529706	3.9759	133229
697871	4.82043	11	144773	0.0411028	570567	3.94111	144773	0.0561674	697871	4.82043	144773
569612	3.49079	7	163175	0.020194	515424	3.15871	163175	0.0568552	569612	3.49079	163175
529129	3.22612	7	164014	0.0182978	483267	2.9465	164014	0.0647608	529129	3.22612	164014
511625	3.58504	14	142711	0.0305698	440113	3.08395	142711	0.0619809	511625	3.58504	142711
492926	3.06444	14	160853	0.0230348	439875	2.73464	160853	0.0460701	492926	3.06444	160853
432368	3.21853	9	134337	0.0221606	387488	2.88444	134337	0.0559532	432368	3.21853	134337
670740	2.7514	14	243781	0.0324957	571627	2.34484	243781	0.0605162	670740	2.7514	243781
625886	4.23207	15	147891	0.0302802	539161	3.64566	147891	0.0722284	625886	4.23207	147891
518810	2.45912	13	210974	0.0434567	419408	1.98796	210974	0.0726223	518810	2.45912	210974
757673	3.74015	12	202578	0.0321004	646952	3.19359	202578	0.0777858	757673	3.74015	202578
436088	3.00328	11	145204	0.0174319	399988	2.75466	145204	0.0561986	436088	3.00328	145204
644549	4.022	15	160256	0.0531945	497408	3.10384	160256	0.0583505	644549	4.022	160256
521041	3.35856	10	155138	0.0243003	462099	2.97863	155138	0.0420391	521041	3.35856	155138
611876	3.48979	14	175333	0.0170089	562392	3.20757	175333	0.0751648	611876	3.48979	175333
587958	2.93028	14	200649	0.0242616	521546	2.59929	200649	0.0702948	587958	2.93028	200649
622916	3.98162	16	156448	0.0217723	559318	3.5751	156448	0.0627628	622916	3.98162	156448
697893	4.39666	9	158733	0.0394948	575012	3.62252	158733	0.0602834	697893	4.39666	158733
640544	3.86197	14	165859	0.00506449	624567	3.76564	165859	0.0789445	640544	3.86197	165859
505089	2.76914	17	182399	0.0303008	435059	2.3852	182399	0.0509792	505089	2.76914	182399
901022	3.19968	10	281598	0.045064	722805	2.5668	281598	0.0488321	901022	3.19968	281598
758131	4.14145	18	183059	0.0126066	712100	3.88999	183059	0.0645418	758131	4.14145	183059
553372	2.40941	5	229671	0.0114549	522739	2.27603	229671	0.0530114	553372	2.40941	229671
400920	3.9165	9	102367	0.0458058	320481	3.13071	102367	0.0704576	400920	3.9165	102367
496651	3.31336	12	149893	0.0306764	427011	2.84877	149893	0.059759	496651	3.31336	149893
456800	2.69632	12	169416	0.0526378	353453	2.0863	169416	0.0686121	456800	2.69632	169416
783680	3.64025	11	215282	0.0436064	633075	2.94068	215282	0.044418	783680	3.64025	215282
486577	3.00418	17	161967	0.0300983	419525	2.59019	161967	0.0480498	486577	3.00418	161967
618316	3.63857	9	169934	0.0359468	518230	3.0496	169934	0.0658611	618316	3.63857	169934
503816	3.85868	12	130567	0.030136	434309	3.32634	130567	0.0605078	503816	3.85868	130567
673222	3.74322	14	179851	0.0142682	627183	3.48724	179851	0.073274	673222	3.74322	179851
420712	4.87784	10	86249.7	0.0282977	365924	4.24261	86249.7	0.0563006	420712	4.87784	86249.7
358005	3.91048	11	91550	0.0302983	308371	3.36834	91550	0.0609209	358005	3.91048	91550
476679	4.21273	12	113152	0.00167851	472698	4.17755	113152	0.0520297	476679	4.21273	113152
448947	3.05415	17	146995	0.0351357	377754	2.56983	146995	0.0720791	448947	3.05415	146995
453620	3.79992	13	119376	0.0215938	407663	3.41494	119376	0.052887	453620	3.79992	119376
551741	2.98999	6	184529	0.0391596	455328	2.46751	184529	0.0547872	551741	2.98999	184529
700000	3.23669	18	216270	0.0291593	606296	2.80342	216270	0.0718799	700000	3.23669	216270
558540	1.96676	14	283989	0.0287684	484692	1.70673	283989	0.0727456	558540	1.96676	283989
469739	4.38833	11	107043	0.0246944	415800	3.88443	107043	0.0634943	469739	4.38833	107043
803293	3.77304	12	212904	0.0324305	684809	3.21652	212904	0.0634962	803293	3.77304	212904
644991	3.38501	20	190543	0.0316269	552002	2.89699	190543	0.0735626	644991	3.38501	190543
551559	3.35098	11	164596	0.0323997	470276	2.85715	164596	0.0543327	551559	3.35098	164596
601030	3.73515	12	160912	0.0439272	484781	3.01271	160912	0.0802299	601030	3.73515	160912
519983	3.27749	14	158653	0.0398935	427607	2.69524	158653	0.0533266	519983	3.27749	158653
641319	3.94465	7	162579	0.0545174	491819	3.0251	162579	0.0459836	641319	3.94465	162579
543054	2.4706	11	219806	0.046682	432284	1.96666	219806	0.0666501	543054	2.4706	219806
470553	3.11201	11	151206	0.040359	386094	2.55344	151206	0.0446717	470553	3.11201	151206
621699	3.79444	8	163845	0.0269396	544322	3.32218	163845	0.0698222	621699	3.79444	163845
696836	4.30124	9	162008	0.0487573	549231	3.39015	162008	0.0705592	696836	4.30124	162008
620139	2.87752	15	215512	0.0374398	516030	2.39444	215512	0.0560646	620139	2.87752	215512
857950	5.06253	12	169470	0.0191174	780442	4.60518	169470	0.0540224	857950	5.06253	169470
662424	3.6439	10	181790	0.0404771	543217	2.98816	181790	0.0630092	662424	3.6439	181790
512758	3.72153	12	137782	0.0222423	459350	3.3339	137782	0.0454877	512758	3.72153	137782
469909	3.47913	9	135065	0.0304844	404396	2.99408	135065	0.0720705	469909	3.47913	135065
428863	3.94642	6	108671	0.00721768	413715	3.80703	108671	0.0489286	428863	3.94642	108671
609087	3.44345	13	176883	0.0212188	548384	3.10027	176883	0.0677735	609087	3.44345	176883
500782	3.98303	11	125729	0.0183256	457315	3.63731	125729	0.0763828	500782	3.98303	125729
519647	4.24996	12	122271	0.0442499	418491	3.42265	122271	0.0822454	519647	4.24996	122271
447979	3.35757	11	133424	0.016275	413239	3.0972	133424	0.0613263	447979	3.35757	133424
517211	2.95777	13	174865	0.0255953	455814	2.60666	174865	0.0567712	517211	2.95777	174865
531122	3.37226	9	157498	0.0278549	462951	2.93942	157498	0.0415849	531122	3.37226	157498
699891	3.87733	8	180508	0.029449	605349	3.35358	180508	0.0553089	699891	3.87733	180508
629117	3.5948	14	175007	0.0405588	515701	2.94674	175007	0.0459181	629117	3.5948	175007
661210	4.02876	10	164123	0.0297174	571149	3.48001	164123	0.0625181	661210	4.02876	164123
503220	3.37713	11	149008	0.0228802	449401	3.01595	149008	0.0519948	503220	3.37713	149008
481313	3.29281	10	146171	0.0277235	419803	2.872	146171	0.0644697	481313	3.29281	146171
563063	3.94571	9	142703	0.0268006	493317	3.45696	142703	0.0821899	563063	3.94571	142703
699006	3.06357	11	228167	0.0176383	640492	2.80712	228167	0.0492087	699006	3.06357	228167
552230	3.62734	15	152241	0.0367982	460945	3.02773	152241	0.0552135	552230	3.62734	152241
744228	3.65266	20	203750	0.036656	621631	3.05095	203750	0.0616727	744228	3.65266	203750
740382	3.86149	14	191735	0.0387232	612290	3.19342	191735	0.0424646	740382	3.86149	191735
644262	3.86258	8	166796	0.0364246	538734	3.22989	166796	0.0660544	644262	3.86258	166796
594011	3.56639	12	166558	0.0359578	497833	2.98895	166558	0.0596018	594011	3.56639	166558
674160	3.25954	12	206827	0.0392276	556172	2.68908	206827	0.0794159	674160	3.25954	206827
503301	4.37129	8	115138	0.0265206	441560	3.83506	115138	0.0553221	503301	4.37129	115138
751354	4.02772	15	186546	0.0356267	630708	3.38098	186546	0.0771492	751354	4.02772	186546
565216	3.09466	5	182642	0.0290593	489793	2.68171	182642	0.0672666	565216	3.09466	182642
523181	3.60461	10	145142	0.0284427	454727	3.13298	145142	0.035948	523181	3.60461	145142
853557	4.46969	10	190966	0.0177351	781733	4.09358	190966	0.0577483	853557	4.46969	190966
579241	4.01666	12	144210	0.0269136	507212	3.51719	144210	0.0605397	579241	4.01666	144210
541515	2.98392	12	181478	0.0348833	456199	2.5138	181478	0.055053	541515	2.98392	181478
657673	3.57238	6	184099	0.0347007	554544	3.0122	184099	0.0567201	657673	3.57238	184099
530772	3.2497	14	163330	0.0287361	460668	2.82048	163330	0.0567764	530772	3.2497	163330
726557	3.98932	16	182126	0.0305559	625046	3.43195	182126	0.0549432	726557	3.98932	182126
666372	3.31294	15	201142	0.0184462	608172	3.02359	201142	0.0707155	666372	3.31294	201142
430033	3.91263	12	109909	0.0226427	384487	3.49823	109909	0.0590614	430033	3.91263	109909
657342	4.43248	14	148301	0.0130547	616065	4.15415	148301	0.0608385	657342	4.43248	148301
747736	3.66239	10	204166	0.0298106	645596	3.16212	204166	0.0580972	747736	3.66239	204166
539529	4.12739	15	130719	0.0372839	449290	3.43706	130719	0.0459019	539529	4.12739	130719
497598	3.72549	10	133566	0.031955	425182	3.18332	133566	0.0707003	497598	3.72549	133566
627009	4.19351	7	149519	0.0283911	545107	3.64575	149519	0.0742173	627009	4.19351	149519
618731	2.33745	15	264703	0.0322809	527852	1.99413	264703	0.0594528	618731	2.33745	264703
659269	4.41772	6	149233	0.0323267	562311	3.76801	149233	0.0583357	659269	4.41772	149233
721412	3.50928	14	205572	0.0440299	581592	2.82913	205572	0.068158	721412	3.50928	205572
769801	4.1555	7	185249	0.0286384	668443	3.60836	185249	0.0429758	769801	4.1555	185249
537440	3.55597	12	151137	0.0204095	485800	3.2143	151137	0.0623611	537440	3.55597	151137
414702	3.56009	13	116486	0.0187693	377882	3.24401	116486	0.0700599	414702	3.56009	116486
556265	3.73175	10	149063	0.0396	458090	3.07314	149063	0.0356123	556265	3.73175	149063
369620	3.84526	9	96123.7	0.0239244	328410	3.41654	96123.7	0.0829028	369620	3.84526	96123.7
572353	4.7478	10	120551	0.0117866	539783	4.47763	120551	0.0686318	572353	4.7478	120551
605271	4.71825	14	128283	0.0355404	508293	3.96229	128283	0.0850172	605271	4.71825	128283
540044	3.30284	16	163509	0.0429401	437655	2.67664	163509	0.0434296	540044	3.30284	163509
619545	3.54498	13	174767	0.0359893	519155	2.97056	174767	0.05816	619545	3.54498	174767
629815	3.41608	13	184368	0.0394759	518968	2.81485	184368	0.0572287	629815	3.41608	184368
362459	3.9727	9	91237.4	0.0323735	309083	3.38768	91237.4	0.0504727	362459	3.9727	91237.4
507351	3.97234	9	127721	0.0370637	422943	3.31146	127721	0.0515799	507351	3.97234	127721
600647	3.41296	9	175990	0.0363305	502490	2.85522	175990	0.0716197	600647	3.41296	175990
720029	3.38832	15	212503	0.0395228	593170	2.79135	212503	0.0547349	720029	3.38832	212503
564575	3.15353	11	179030	0.0246349	499891	2.79223	179030	0.0572501	564575	3.15353	179030
364169	3.26992	11	111369	0.0338253	308367	2.76886	111369	0.0669884	364169	3.26992	111369
849319	3.57009	9	237898	0.023149	757489	3.18409	237898	0.0554128	849319	3.57009	237898
567152	3.87201	8	146475	0.0252305	500716	3.41844	146475	0.0417985	567152	3.87201	146475
575754	3.64073	13	158142	0.0295698	497689	3.14709	158142	0.0652089	575754	3.64073	158142
684468	3.50985	8	195013	0.0320027	584722	2.99837	195013	0.0576362	684468	3.50985	195013
688056	3.8392	13	179219	0.0336092	583233	3.25431	179219	0.0679047	688056	3.8392	179219
667977	4.75838	19	140379	0.0332188	567283	4.04108	140379	0.0539656	667977	4.75838	140379
411793	3.34232	9	123206	0.0191967	374446	3.03919	123206	0.0606989	411793	3.34232	123206
585762	3.86079	12	151721	0.0247532	518352	3.41649	151721	0.0653215	585762	3.86079	151721
427572	2.74437	7	155800	0.0254004	377174	2.42089	155800	0.0591538	427572	2.74437	155800
752574	4.10616	9	183279	0.0349908	633675	3.45743	183279	0.0714489	752574	4.10616	183279
652601	3.55283	13	183685	0.031632	558500	3.04054	183685	0.056495	652601	3.55283	183685
725794	3.42197	10	212098	0.0248826	641864	3.02626	212098	0.0484714	725794	3.42197	212098
675247	3.69765	11	182615	0.0325947	575193	3.14975	182615	0.076265	675247	3.69765	182615
813430	4.39383	16	185130	0.0213336	731951	3.95372	185130	0.0712478	813430	4.39383	185130
620918	3.84327	14	161560	0.0384644	514134	3.18232	161560	0.0550264	620918	3.84327	161560
453636	2.65053	11	171149	0.0219061	407055	2.37836	171149	0.0546095	453636	2.65053	171149
523461	2.46321	14	212512	0.0396277	431018	2.02821	212512	0.0556642	523461	2.46321	212512
591889	3.49649	11	169281	0.0204658	534869	3.15966	169281	0.0485282	591889	3.49649	169281
601241	4.37663	16	137375	0.0199557	544680	3.96491	137375	0.0581752	601241	4.37663	137375
462211	3.75849	10	122978	0.0332685	392441	3.19115	122978	0.0478735	462211	3.75849	122978
491160	3.96276	7	123944	0.03894	405762	3.27375	123944	0.0488279	491160	3.96276	123944
616469	3.92595	13	157024	0.0498805	483294	3.07784	157024	0.0668105	616469	3.92595	157024
633936	3.60616	7	175793	0.042272	515395	2.93183	175793	0.0526029	633936	3.60616	175793
454641	3.1853	11	142731	0.0360381	380881	2.66853	142731	0.0604371	454641	3.1853	142731
644032	3.88603	8	165730	0.0357551	540284	3.26002	165730	0.0481969	644032	3.88603	165730
566388	3.86514	13	146538	0.0225586	506609	3.4572	146538	0.0467654	566388	3.86514	146538
433488	2.94256	6	147317	0.0268177	379761	2.57785	147317	0.0568583	433488	2.94256	147317
764574	4.65758	10	164157	0.0422712	621607	3.78666	164157	0.0636324	764574	4.65758	164157
540921	4.93458	7	109618	0.0319909	462120	4.21571	109618	0.0528621	540921	4.93458	109618
508202	4.92299	6	103230	0.0255104	448060	4.34039	103230	0.0524204	508202	4.92299	103230
623243	3.65221	14	170648	0.0335169	528529	3.09719	170648	0.051235	623243	3.65221	170648
733216	3.55648	9	206163	0.0383679	607401	2.94621	206163	0.0562059	733216	3.55648	206163
480176	3.81065	12	126009	0.0152688	445139	3.53259	126009	0.0545365	480176	3.81065	126009
674213	3.1234	13	215859	0.011298	637384	2.95278	215859	0.0600489	674213	3.1234	215859
756152	3.46687	14	218108	0.0290161	655388	3.00488	218108	0.0483628	756152	3.46687	218108
751506	4.44986	14	168883	0.0260096	660960	3.91371	168883	0.0419673	751506	4.44986	168883
544278	3.62806	13	150019	0.04229	442464	2.94938	150019	0.053463	544278	3.62806	150019
631678	3.44158	11	183543	0.0386176	522658	2.8476	183543	0.0619785	631678	3.44158	183543
504955	2.98865	15	168958	0.0330965	429090	2.53963	168958	0.0666978	504955	2.98865	168958
686249	3.28201	22	209094	0.0395953	565145	2.70282	209094	0.0575547	686249	3.28201	209094
765657	3.19328	21	239771	0.0291357	663240	2.76614	239771	0.0670403	765657	3.19328	239771
753052	3.64111	10	206819	0.0510131	587197	2.83918	206819	0.0606321	753052	3.64111	206819
644843	2.80165	10	230165	0.0359172	540541	2.34849	230165	0.0486348	644843	2.80165	230165
682198	3.60519	14	189227	0.0253376	601971	3.18122	189227	0.0703652	682198	3.60519	189227
503649	4.83126	19	104248	0.0401157	413732	3.96874	104248	0.0675216	503649	4.83126	104248
723579	3.53896	7	204461	0.0383509	599467	2.93194	204461	0.0598277	723579	3.53896	204461
551707	3.01037	6	183269	0.0304794	474802	2.59074	183269	0.0586966	551707	3.01037	183269
772801	2.99048	17	258420	0.028356	671971	2.6003	258420	0.0616845	772801	2.99048	258420
461798	3.62645	16	127342	0.0441207	372133	2.92232	127342	0.0677881	461798	3.62645	127342
372097	4.10669	17	90607.5	0.024446	329770	3.63954	90607.5	0.0404082	372097	4.10669	90607.5
516008	4.5698	9	112917	0.00870931	494113	4.37589	112917	0.0610678	516008	4.5698	112917
674134	4.82739	14	139648	0.038083	559224	4.00453	139648	0.0499716	674134	4.82739	139648
541353	3.45259	9	156796	0.0255964	477088	3.04272	156796	0.0470049	541353	3.45259	156796
618494	2.33802	15	264538	0.022706	552817	2.08975	264538	0.0580326	618494	2.33802	264538
657498	4.19214	10	156841	0.0589546	493751	3.1481	156841	0.0442737	657498	4.19214	156841
632241	2.94591	11	214616	0.0459796	504971	2.3529	214616	0.0723206	632241	2.94591	214616
518504	3.77449	7	137371	0.029118	449186	3.26989	137371	0.0631195	518504	3.77449	137371
565495	3.4536	17	163741	0.0345278	477220	2.91448	163741	0.0584472	565495	3.4536	163741
344186	3.48382	11	98795.6	0.0168288	316631	3.20491	98795.6	0.0702586	344186	3.48382	98795.6
376653	3.46926	11	108569	0.0276153	328691	3.0275	108569	0.0443007	376653	3.46926	108569
645722	4.445	16	145269	0.0126317	606440	4.17459	145269	0.0585242	645722	4.445	145269
539133	4.02527	14	133937	0.0266792	472631	3.52875	133937	0.0595473	539133	4.02527	133937
597943	3.43966	10	173838	0.0348344	503855	2.89842	173838	0.0573619	597943	3.43966	173838
510525	3.09829	8	164776	0.0378965	423884	2.57248	164776	0.0778762	510525	3.09829	164776
473785	3.8183	6	124083	0.0219547	425034	3.4254	124083	0.0554295	473785	3.8183	124083
767670	2.87911	11	266635	0.0589893	576390	2.16172	266635	0.0492186	767670	2.87911	266635
637892	3.31499	13	192426	0.0278145	556127	2.89007	192426	0.0727629	637892	3.31499	192426
749849	3.16282	4	237083	0.0352407	630620	2.65992	237083	0.0751721	749849	3.16282	237083
465956	3.56561	14	130680	0.0228157	416254	3.18528	130680	0.0518647	465956	3.56561	130680
486079	4.03294	7	120527	0.0305621	418154	3.46937	120527	0.0744701	486079	4.03294	120527
420197	3.3658	15	124843	0.0313761	360054	2.88405	124843	0.0369659	420197	3.3658	124843
562717	3.98365	11	141256	0.0329793	478445	3.38706	141256	0.0623029	562717	3.98365	141256
623853	4.13496	12	150873	0.0266277	547038	3.62582	150873	0.063191	623853	4.13496	150873
573752	3.20672	9	178922	0.0260627	504493	2.81963	178922	0.0694535	573752	3.20672	178922
689355	3.73082	21	184773	0.0290947	597264	3.23242	184773	0.0694533	689355	3.73082	184773
455413	4.24261	10	107343	0.02179	408881	3.80912	107343	0.0541223	455413	4.24261	107343
655239	4.50007	17	145607	0.0341157	554057	3.80516	145607	0.0400553	655239	4.50007	145607
831356	3.70597	14	224329	0.0160857	767601	3.42177	224329	0.0613167	831356	3.70597	224329
661406	2.79417	14	236709	0.042086	538209	2.27371	236709	0.0525184	661406	2.79417	236709
653009	3.93666	12	165879	0.0325557	556355	3.35398	165879	0.0626018	653009	3.93666	165879
517088	3.85264	14	134217	0.0294193	447304	3.33271	134217	0.0576797	517088	3.85264	134217
522320	3.5136	9	148657	0.0232218	465680	3.13259	148657	0.0533128	522320	3.5136	148657
578057	3.86511	13	149558	0.0442759	465473	3.11233	149558	0.0780273	578057	3.86511	149558
402740	4.30755	15	93496.4	0.0152273	373429	3.99405	93496.4	0.0734976	402740	4.30755	93496.4
743655	3.20745	14	231853	0.0255409	655551	2.82745	231853	0.0525211	743655	3.20745	231853
532909	3.5027	16	152142	0.0340135	450840	2.96328	152142	0.0697737	532909	3.5027	152142
354520	3.68031	11	96328.8	0.043023	287191	2.98137	96328.8	0.0478989	354520	3.68031	96328.8
825614	3.78002	15	218415	0.0240242	733206	3.35694	218415	0.0691033	825614	3.78002	218415
674040	3.51514	11	191753	0.0357454	565484	2.94902	191753	0.0697822	674040	3.51514	191753
656604	3.55987	17	184446	0.0385419	543480	2.94655	184446	0.0741788	656604	3.55987	184446
496288	5.20096	18	95422.5	0.0237857	441254	4.62422	95422.5	0.0487028	496288	5.20096	95422.5
619977	4.16807	7	148745	0.0176754	567975	3.81846	148745	0.0553138	619977	4.16807	148745
588949	3.07471	11	191546	0.0149735	546769	2.85451	191546	0.0638258	588949	3.07471	191546
638332	3.16132	5	201919	0.0284467	554801	2.74764	201919	0.0667191	638332	3.16132	201919
482803	2.97707	6	162174	0.0288159	418872	2.58286	162174	0.0568597	482803	2.97707	162174
577176	4.65754	10	123923	0.0249617	510235	4.11736	123923	0.0426433	577176	4.65754	123923
579549	4.09638	10	141478	0.0176904	530899	3.75251	141478	0.0577192	579549	4.09638	141478
646375	4.00034	11	161580	0.0399989	531276	3.28801	161580	0.067395	646375	4.00034	161580
728742	3.24685	15	224446	0.0295433	630015	2.80698	224446	0.0602851	728742	3.24685	224446
606097	3.7544	13	161437	0.0167694	557738	3.45484	161437	0.0685686	606097	3.7544	161437
513002	3.9677	14	129295	0.0307321	440951	3.41043	129295	0.0758559	513002	3.9677	129295
800274	3.88419	14	206034	0.0324461	682185	3.31103	206034	0.0605059	800274	3.88419	206034
446636	4.14144	5	107846	0.0383913	369955	3.43041	107846	0.0692413	446636	4.14144	107846
581680	4.20837	13	138220	0.0281594	506270	3.66279	138220	0.0461086	581680	4.20837	138220
581391	4.20486	11	138266	0.0398276	478258	3.45896	138266	0.0456282	581391	4.20486	138266
542310	3.28502	12	165086	0.0372028	451782	2.73665	165086	0.0565616	542310	3.28502	165086
613392	3.28392	14	186787	0.0183936	559964	2.99788	186787	0.0479222	613392	3.28392	186787
536476	4.09844	16	130898	0.0180197	490648	3.74833	130898	0.0391668	536476	4.09844	130898
733215	3.15439	6	232442	0.0322535	625604	2.69144	232442	0.0427468	733215	3.15439	232442
724382	4.46355	13	162288	0.0283942	629752	3.88045	162288	0.067118	724382	4.46355	162288
496190	4.32399	15	114753	0.0274854	433281	3.77578	114753	0.0399392	496190	4.32399	114753
432657	3.48341	8	124205	0.0235051	385207	3.10138	124205	0.0652551	432657	3.48341	124205
483673	3.60343	10	134226	0.0411326	395386	2.94568	134226	0.075304	483673	3.60343	134226
637356	4.34538	12	146674	0.0321795	544009	3.70896	146674	0.0783972	637356	4.34538	146674
573152	3.47966	20	164715	0.0339467	485042	2.94473	164715	0.0469945	573152	3.47966	164715
456225	3.44177	16	132555	0.0344395	385171	2.90574	132555	0.075559	456225	3.44177	132555
580031	3.48799	18	166294	0.0523748	449365	2.70223	166294	0.0547969	580031	3.48799	166294
695240	3.58281	15	194049	0.0211405	626192	3.22698	194049	0.0477618	695240	3.58281	194049
568667	3.09177	13	183930	0.04097	465230	2.52939	183930	0.0614999	568667	3.09177	183930
585469	3.39769	14	172314	0.0215649	526228	3.05389	172314	0.0793979	585469	3.39769	172314
624075	3.93055	7	158775	0.034986	525490	3.30964	158775	0.0635054	624075	3.93055	158775
636497	4.24456	14	149956	0.0213518	572690	3.81906	149956	0.0542422	636497	4.24456	149956
739093	3.11065	11	237601	0.036389	618137	2.60158	237601	0.0641672	739093	3.11065	237601
552582	4.68858	7	117857	0.0367199	461413	3.91502	117857	0.0562746	552582	4.68858	117857
582764	3.94094	8	147874	0.0255343	513738	3.47415	147874	0.0601786	582764	3.94094	147874
832523	2.57706	9	323051	0.0450443	667918	2.06753	323051	0.0767214	832523	2.57706	323051
167423	4.02573	15	41588.2	0.0131931	156803	3.77037	41588.2	0.0588668	167423	4.02573	41588.2
840734	3.57775	11	234990	0.0409905	687741	2.92668	234990	0.0877928	840734	3.57775	234990
575330	3.65464	13	157425	0.0349158	484610	3.07836	157425	0.0562923	575330	3.65464	157425
664263	4.3743	12	151856	0.0209659	598803	3.94324	151856	0.0434143	664263	4.3743	151856
679633	3.61267	18	188124	0.0334694	576482	3.06437	188124	0.0536436	679633	3.61267	188124
542565	4.53675	11	119593	0.0341067	458802	3.83635	119593	0.0534725	542565	4.53675	119593
630840	3.73963	13	168691	0.0385049	522248	3.09589	168691	0.0627628	630840	3.73963	168691
573538	3.80415	18	150767	0.0453016	459572	3.04824	150767	0.0778091	573538	3.80415	150767
462804	4.8845	9	94749.4	0.0265218	406028	4.28528	94749.4	0.0645255	462804	4.8845	94749.4
685343	3.63622	9	188477	0.0293036	593186	3.14726	188477	0.072739	685343	3.63622	188477
807466	3.1782	10	254064	0.0347878	680562	2.6787	254064	0.0579902	807466	3.1782	254064
322451	2.71889	12	118596	0.0381196	267440	2.25504	118596	0.0534029	322451	2.71889	118596
588442	3.98868	8	147528	0.0431774	476335	3.22878	147528	0.0531908	588442	3.98868	147528
475230	3.6205	14	131261	0.0282849	413368	3.14921	131261	0.0706788	475230	3.6205	131261
830082	3.24192	8	256047	0.0355047	697206	2.72296	256047	0.0466623	830082	3.24192	256047
604124	3.93805	14	153407	0.0354698	507504	3.30822	153407	0.045091	604124	3.93805	153407
613305	3.26065	21	188093	0.0315625	525048	2.79143	188093	0.0595522	613305	3.26065	188093
635621	3.98858	14	159361	0.0399314	522607	3.2794	159361	0.0563889	635621	3.98858	159361
670328	3.9981	10	167662	0.0331838	569377	3.39598	167662	0.0556132	670328	3.9981	167662
485667	3.93767	17	123339	0.0289042	421176	3.4148	123339	0.0546157	485667	3.93767	123339
475259	4.63938	15	102440	0.0241031	421902	4.11853	102440	0.0744881	475259	4.63938	102440
615624	4.21473	9	146065	0.0426008	499718	3.42121	146065	0.0695421	615624	4.21473	146065
603084	3.56814	13	169019	0.0551087	461203	2.7287	169019	0.0615862	603084	3.56814	169019
618955	2.37665	11	260432	0.0331112	525925	2.01943	260432	0.0703606	618955	2.37665	260432
340932	3.47298	16	98167.2	0.0215035	306527	3.1225	98167.2	0.0654286	340932	3.47298	98167.2
511893	3.70784	18	138057	0.0287274	444302	3.21824	138057	0.0555494	511893	3.70784	138057
489025	3.74864	17	130454	0.0388483	404176	3.09822	130454	0.0477707	489025	3.74864	130454
546034	3.74625	12	145755	0.0347036	460405	3.15876	145755	0.0473423	546034	3.74625	145755
685920	3.76582	6	182144	0.0382098	568654	3.122	182144	0.0598161	685920	3.76582	182144
683056	2.98464	12	228857	0.0387648	564768	2.46778	228857	0.0554237	683056	2.98464	228857
385695	3.8707	16	99644.8	0.0324557	328766	3.29938	99644.8	0.0556672	385695	3.8707	99644.8
574610	4.33939	16	132417	0.0281604	500114	3.7768	132417	0.0429874	574610	4.33939	132417
712032	2.88023	14	247213	0.0286722	618179	2.50059	247213	0.0515236	712032	2.88023	247213
582786	3.72277	11	156546	0.0150667	540799	3.45456	156546	0.0562678	582786	3.72277	156546
351546	3.66355	14	95957.5	0.0448486	282303	2.94195	95957.5	0.0689753	351546	3.66355	95957.5
618572	3.65698	9	169148	0.0240406	549294	3.24741	169148	0.042324	618572	3.65698	169148
547975	3.35799	14	163186	0.0304601	471634	2.89017	163186	0.0570493	547975	3.35799	163186
568602	2.75249	8	206577	0.0143413	529527	2.56334	206577	0.0620224	568602	2.75249	206577
606656	3.96075	5	153167	0.0214215	545654	3.56248	153167	0.0669034	606656	3.96075	153167
464260	2.83593	9	163707	0.0374427	386314	2.3598	163707	0.0794394	464260	2.83593	163707
505936	4.18409	11	120919	0.0216776	454492	3.75865	120919	0.0677971	505936	4.18409	120919
410649	4.33105	8	94815.2	0.0398706	337734	3.56202	94815.2	0.0699035	410649	4.33105	94815.2
497036	4.88423	10	101764	0.0337752	420976	4.13681	101764	0.0616524	497036	4.88423	101764
734953	3.10496	11	236702	0.0229028	656277	2.77258	236702	0.0551088	734953	3.10496	236702
462948	4.30493	12	107539	0.0465201	368803	3.42948	107539	0.0743479	462948	4.30493	107539
514507	4.15577	9	123805	0.0198379	466375	3.767	123805	0.0437959	514507	4.15577	123805
731400	4.05001	13	180592	0.0339723	618885	3.42698	180592	0.0557266	731400	4.05001	180592
493010	3.64419	12	135287	0.0220439	442088	3.26779	135287	0.0635412	493010	3.64419	135287
686846	3.28546	9	209056	0.037281	571975	2.73599	209056	0.0700787	686846	3.28546	209056
749023	4.22579	22	177250	0.0322434	639123	3.60577	177250	0.0721126	749023	4.22579	177250
678699	4.1736	10	162617	0.0306836	583513	3.58826	162617	0.0567067	678699	4.1736	162617
647050	4.6622	10	138786	0.0192376	588248	4.23851	138786	0.05701	647050	4.6622	138786
690524	4.0872	5	168948	0.0274051	603213	3.5704	168948	0.0443957	690524	4.0872	168948
359800	3.24669	13	110821	0.0223206	322200	2.9074	110821	0.0356754	359800	3.24669	110821
648287	2.8455	10	227829	0.0283639	563681	2.47414	227829	0.075475	648287	2.8455	227829
684601	2.76819	15	247310	0.0291194	593074	2.3981	247310	0.0689408	684601	2.76819	247310
654403	4.65095	13	140703	0.0372955	544920	3.87284	140703	0.0596067	654403	4.65095	140703
395768	3.95975	11	99947.8	0.037889	328614	3.28786	99947.8	0.0708223	395768	3.95975	99947.8
527779	3.78046	11	139607	0.0492305	415048	2.97297	139607	0.0758155	527779	3.78046	139607
719463	4.0061	10	179592	0.0122307	677035	3.76986	179592	0.0655074	719463	4.0061	179592
661296	3.89274	8	169879	0.0503261	517339	3.04533	169879	0.0670848	661296	3.89274	169879
819051	2.54952	16	321257	0.0252335	723098	2.25084	321257	0.0688884	819051	2.54952	321257
473425	2.67689	7	176856	0.039563	389939	2.20484	176856	0.0561723	473425	2.67689	176856
579840	3.93547	15	147337	0.0345932	489170	3.32008	147337	0.0629857	579840	3.93547	147337
465352	3.30344	9	140869	0.0279248	405485	2.87846	140869	0.0512183	465352	3.30344	140869
354723	3.89096	10	91165.9	0.0243511	314517	3.44995	91165.9	0.0651601	354723	3.89096	91165.9
498073	4.32759	13	115092	0.0471624	395569	3.43697	115092	0.0520142	498073	4.32759	115092
679987	4.10531	13	165636	0.024031	603859	3.64569	165636	0.0609562	679987	4.10531	165636
495745	3.39447	7	146045	0.0227761	442950	3.03298	146045	0.0723393	495745	3.39447	146045
578808	3.35917	8	172307	0.0323754	493567	2.86446	172307	0.0678759	578808	3.35917	172307
502483	3.87016	10	129835	0.00758353	483856	3.72669	129835	0.0509864	502483	3.87016	129835
603789	3.67071	14	164488	0.0267787	529055	3.21637	164488	0.0633643	603789	3.67071	164488
674019	3.75387	16	179553	0.0405123	552632	3.07782	179553	0.0669528	674019	3.75387	179553
595652	4.02153	12	148116	0.0428858	482847	3.25993	148116	0.0611607	595652	4.02153	148116
668946	3.80908	8	175619	0.0369949	557838	3.17641	175619	0.0658955	668946	3.80908	175619
398608	3.30348	10	120663	0.0240816	353894	2.93291	120663	0.0551257	398608	3.30348	120663
604510	3.88108	13	155758	0.0296486	522346	3.35357	155758	0.0637752	604510	3.88108	155758
551619	3.76151	9	146648	0.0297443	476422	3.24874	146648	0.0674817	551619	3.76151	146648
561970	3.25907	13	172433	0.0282067	489003	2.83591	172433	0.0772644	561970	3.25907	172433
599112	3.29718	7	181704	0.0224297	536217	2.95105	181704	0.0444293	599112	3.29718	181704
584456	4.07923	12	143276	0.0350455	491989	3.43385	143276	0.0629603	584456	4.07923	143276
651540	3.51064	17	185590	0.0216695	585314	3.1538	185590	0.0682835	651540	3.51064	185590
615226	4.17195	16	147467	0.032917	523248	3.54823	147467	0.0637406	615226	4.17195	147467
459805	3.82923	12	120078	0.0269163	402623	3.35302	120078	0.0598953	459805	3.82923	120078
475807	3.55116	9	133986	0.0157446	440056	3.28433	133986	0.0678735	475807	3.55116	133986
664804	5.33922	18	124513	0.0432463	537972	4.3206	124513	0.0650625	664804	5.33922	124513
616798	3.25718	17	189365	0.044087	497118	2.62518	189365	0.0575973	616798	3.25718	189365
441990	4.10856	16	107578	0.0190958	402103	3.73779	107578	0.0561325	441990	4.10856	107578
546809	3.4317	14	159341	0.0332966	464206	2.91329	159341	0.0651364	546809	3.4317	159341
343278	3.78305	10	90741.1	0.0254697	302714	3.33602	90741.1	0.0469393	343278	3.78305	90741.1
611878	3.80135	16	160963	0.0356928	513464	3.18995	160963	0.0731654	611878	3.80135	160963
664950	3.27353	10	203130	0.024492	589178	2.9005	203130	0.0615869	664950	3.27353	203130
605172	4.19596	12	144227	0.0112221	572329	3.96824	144227	0.0539381	605172	4.19596	144227
539589	4.19167	8	128729	0.045437	432089	3.35658	128729	0.0718788	539589	4.19167	128729
672834	3.68692	9	182492	0.0309773	577647	3.16533	182492	0.0638874	672834	3.68692	182492
564429	3.78257	12	149218	0.0337035	478222	3.20485	149218	0.0527448	564429	3.78257	149218
425110	3.31716	10	128155	0.0382109	352431	2.75004	128155	0.0516558	425110	3.31716	128155
478182	2.92445	9	163512	0.0271664	418205	2.55765	163512	0.0688253	478182	2.92445	163512
672396	3.83712	13	175234	0.0386506	556260	3.17438	175234	0.0606461	672396	3.83712	175234
336243	3.51189	14	95744.4	0.0237921	298948	3.12235	95744.4	0.0431554	336243	3.51189	95744.4
605034	3.57697	14	169147	0.0159596	558982	3.30471	169147	0.0662175	605034	3.57697	169147
432661	3.88307	8	111422	0.0283345	376249	3.37678	111422	0.0584042	432661	3.88307	111422
619035	3.88251	10	159442	0.0341317	523403	3.28272	159442	0.0591562	619035	3.88251	159442
517111	2.9468	15	175482	0.0289678	448306	2.55471	175482	0.0525344	517111	2.9468	175482
678847	3.35853	10	202126	0.0282177	590672	2.92229	202126	0.0612347	678847	3.35853	202126
691372	4.17456	9	165615	0.0368552	576927	3.48354	165615	0.0791383	691372	4.17456	165615
503218	3.85988	15	130371	0.0407201	412180	3.16158	130371	0.0821474	503218	3.85988	130371
446467	3.99077	9	111875	0.047813	353485	3.15964	111875	0.0520492	446467	3.99077	111875
565513	2.85962	16	197758	0.0347245	476781	2.41093	197758	0.0571261	565513	2.85962	197758
567305	3.46763	14	163600	0.00685852	548244	3.35113	163600	0.0748722	567305	3.46763	163600
360974	4.2953	15	84039.3	0.0363061	302020	3.59379	84039.3	0.0631567	360974	4.2953	84039.3
563929	4.06681	8	138666	0.0269575	493699	3.56034	138666	0.0604124	563929	4.06681	138666
671827	3.56973	11	188201	0.0311919	576183	3.06152	188201	0.0751461	671827	3.56973	188201
501556	4.07318	9	123136	0.0237964	445914	3.6213	123136	0.0623197	501556	4.07318	123136
606180	3.80452	5	159331	0.0309777	520421	3.26628	159331	0.0567101	606180	3.80452	159331
717541	3.60766	15	198894	0.029377	620832	3.12143	198894	0.0544611	717541	3.60766	198894
429391	3.80797	13	112761	0.0248314	379832	3.36846	112761	0.0501929	429391	3.80797	112761
561719	3.31389	16	169504	0.0277339	489910	2.89025	169504	0.0638336	561719	3.31389	169504
557940	3.42938	17	162694	0.0472937	442838	2.72191	162694	0.0513386	557940	3.42938	162694
557975	4.59189	12	121513	0.0188145	508323	4.18327	121513	0.0583471	557975	4.59189	121513
840869	3.76678	18	223233	0.0345028	709692	3.17915	223233	0.0578624	840869	3.76678	223233
547652	3.27223	18	167364	0.0332394	465050	2.77868	167364	0.0459799	547652	3.27223	167364
625795	3.93893	15	158874	0.0341131	529166	3.33072	158874	0.0570584	625795	3.93893	158874
625559	3.92341	12	159443	0.0428133	507265	3.18149	159443	0.0486822	625559	3.92341	159443
409728	3.29813	11	124231	0.0347283	345433	2.78058	124231	0.0774623	409728	3.29813	124231
548003	3.06995	12	178506	0.0297827	473211	2.65096	178506	0.0673929	548003	3.06995	178506
598630	3.29295	12	181791	0.0351156	503749	2.77103	181791	0.0686025	598630	3.29295	181791
348287	3.37874	18	103082	0.0271959	304558	2.95453	103082	0.0538006	348287	3.37874	103082
570523	4.29065	16	132969	0.0277464	497558	3.74191	132969	0.0641933	570523	4.29065	132969
577300	4.13551	12	139596	0.0251328	509918	3.65282	139596	0.0495791	577300	4.13551	139596
561787	4.35241	8	129075	0.0409958	459543	3.56029	129075	0.0541986	561787	4.35241	129075
654411	3.71399	13	176201	0.0502238	512202	2.90691	176201	0.0403463	654411	3.71399	176201
691669	4.68523	14	147628	0.0545531	530342	3.59243	147628	0.0699195	691669	4.68523	147628
637096	3.55401	14	179261	0.0340936	538773	3.00552	179261	0.0507394	637096	3.55401	179261
441838	4.55865	15	96922.9	0.038039	366602	3.7824	96922.9	0.0396705	441838	4.55865	96922.9
377949	3.2344	12	116853	0.0238707	335899	2.87454	116853	0.0362766	377949	3.2344	116853
652275	3.13968	9	207752	0.028328	567248	2.73041	207752	0.0472683	652275	3.13968	207752
891007	4.02095	7	221591	0.0299363	768828	3.46958	221591	0.0528339	891007	4.02095	221591
677187	3.2261	15	209909	0.0346578	571117	2.72078	209909	0.0578851	677187	3.2261	209909
392222	3.05645	19	128326	0.0363991	328017	2.55613	128326	0.0590873	392222	3.05645	128326
679778	3.3995	14	199964	0.023249	605983	3.03046	199964	0.0633893	679778	3.3995	199964
604145	3.18586	20	189634	0.0211121	544220	2.86985	189634	0.0572146	604145	3.18586	189634
590635	3.71724	11	158891	0.0264688	518311	3.26206	158891	0.0723761	590635	3.71724	158891
786013	3.22931	13	243399	0.0349397	661994	2.71979	243399	0.0343376	786013	3.22931	243399
653335	4.23196	12	154381	0.0418941	532130	3.44686	154381	0.0610242	653335	4.23196	154381
631668	3.57425	6	176727	0.0263857	554543	3.13785	176727	0.0383338	631668	3.57425	176727
558379	2.72782	8	204698	0.0406438	457529	2.23515	204698	0.0541613	558379	2.72782	204698
453950	3.67581	20	123496	0.0215946	407957	3.30339	123496	0.0536896	453950	3.67581	123496
515635	3.10893	8	165856	0.042439	418880	2.52556	165856	0.0548563	515635	3.10893	165856
632955	4.06621	7	155662	0.031959	540830	3.47438	155662	0.068508	632955	4.06621	155662
607197	2.499	9	242976	0.0427993	492409	2.02657	242976	0.0467338	607197	2.499	242976
651723	3.74024	9	174246	0.0356394	547041	3.13948	174246	0.0545551	651723	3.74024	174246
751992	3.59357	11	209260	0.0194121	683068	3.26421	209260	0.0519292	751992	3.59357	209260
761258	4.35295	14	174883	0.0279715	663172	3.79209	174883	0.0567096	761258	4.35295	174883
336816	2.63083	14	128026	0.0400439	276780	2.1619	128026	0.0566362	336816	2.63083	128026
584031	3.79875	13	153743	0.0421522	475095	3.09019	153743	0.0458605	584031	3.79875	153743
596542	3.06836	12	194417	0.0314399	511000	2.62837	194417	0.0430065	596542	3.06836	194417
503573	4.45687	10	112988	0.0286775	437186	3.86932	112988	0.0513823	503573	4.45687	112988
688721	4.21889	10	163247	0.0398325	566535	3.47041	163247	0.0619987	688721	4.21889	163247
522917	3.59988	16	145260	0.0336632	443136	3.05065	145260	0.0558107	522917	3.59988	145260
755362	4.01279	14	188239	0.0319055	645588	3.42963	188239	0.0759549	755362	4.01279	188239
412292	4.01793	13	102613	0.0227566	368420	3.59038	102613	0.0769017	412292	4.01793	102613
538786	3.18853	9	168976	0.0237964	479014	2.8348	168976	0.0635909	538786	3.18853	168976
691937	4.45355	10	155367	0.0328344	588726	3.78925	155367	0.0662704	691937	4.45355	155367
648056	4.15534	9	155957	0.0263573	569009	3.6485	155957	0.0481925	648056	4.15534	155957
532161	3.48958	16	152500	0.0515027	413991	2.7147	152500	0.0474756	532161	3.48958	152500
538413	4.11775	14	130754	0.0120438	507130	3.8785	130754	0.041952	538413	4.11775	130754
609193	4.02862	11	151216	0.0435607	492228	3.25512	151216	0.0658868	609193	4.02862	151216
436983	3.85659	17	113308	0.0168181	402021	3.54803	113308	0.0530036	436983	3.85659	113308
673710	3.63079	12	185555	0.0421041	548173	2.95424	185555	0.0653453	673710	3.63079	185555
468118	4.00656	9	116838	0.0327234	398506	3.41076	116838	0.0684704	468118	4.00656	116838
554734	3.99671	9	138798	0.0239589	492802	3.5505	138798	0.0638149	554734	3.99671	138798
600363	4.74061	16	126643	0.0248302	531073	4.19348	126643	0.0735511	600363	4.74061	126643
700941	4.52761	5	154815	0.018588	639276	4.1293	154815	0.0644766	700941	4.52761	154815
563519	4.27906	11	131692	0.0326636	479860	3.6438	131692	0.0466097	563519	4.27906	131692
638673	4.31801	8	147909	0.0460684	509892	3.44733	147909	0.0616859	638673	4.31801	147909
793597	3.78661	18	209580	0.0326462	675837	3.22473	209580	0.0581435	793597	3.78661	209580
642742	3.1688	6	202834	0.0370442	535859	2.64186	202834	0.0649247	642742	3.1688	202834
599394	2.21228	1	270939	0.0125539	563147	2.0785	270939	0.0486969	599394	2.21228	270939
297493	4.85904	13	61224.6	0.0181291	271933	4.44157	61224.6	0.0397921	297493	4.85904	61224.6
569262	4.07881	5	139566	0.0295288	492175	3.52647	139566	0.0669366	569262	4.07881	139566
530727	3.39803	11	156187	0.0355112	445756	2.854	156187	0.071043	530727	3.39803	156187
673197	4.11194	11	163718	0.0384343	557503	3.40527	163718	0.0695269	673197	4.11194	163718
456185	3.48627	8	130852	0.031565	390533	2.98454	130852	0.0816196	456185	3.48627	130852
771297	4.35491	12	177110	0.0249847	681765	3.84939	177110	0.051754	771297	4.35491	177110
435902	3.09987	18	140620	0.0343716	368134	2.61795	140620	0.05483	435902	3.09987	140620
711716	3.82706	2	185969	0.0342461	601433	3.23404	185969	0.0749367	711716	3.82706	185969
472651	3.55973	9	132777	0.0402732	387975	2.922	132777	0.038965	472651	3.55973	132777
649550	3.35999	18	193319	0.0370841	541430	2.80071	193319	0.0626668	649550	3.35999	193319
629375	3.23988	13	194259	0.0287195	546292	2.81219	194259	0.060453	629375	3.23988	194259
684679	3.55677	10	192500	0.00881616	655280	3.40405	192500	0.0687953	684679	3.55677	192500
694029	3.48306	10	199259	0.0329868	590071	2.96133	199259	0.0598855	694029	3.48306	199259
385850	3.55867	13	108425	0.0225287	345176	3.18354	108425	0.0394065	385850	3.55867	108425
557011	3.4509	11	161410	0.0348577	469311	2.90757	161410	0.0849608	557011	3.4509	161410
551683	3.8253	20	144220	0.0344326	465777	3.22964	144220	0.0583786	551683	3.8253	144220
622177	4.0888	5	152166	0.0206792	561652	3.69105	152166	0.0415521	622177	4.0888	152166
541285	3.26749	14	165658	0.0330199	460132	2.77761	165658	0.0557827	541285	3.26749	165658
653457	3.88189	4	168335	0.0381497	541897	3.21917	168335	0.0598009	653457	3.88189	168335
741114	3.47165	9	213476	0.0349941	624016	2.92312	213476	0.0651839	741114	3.47165	213476
597480	3.34478	7	178631	0.0350822	502863	2.8151	178631	0.060772	597480	3.34478	178631
532820	3.76008	8	141704	0.0425977	432510	3.0522	141704	0.0606057	532820	3.76008	141704
501071	3.80831	17	131573	0.00906449	478966	3.6403	131573	0.0695734	501071	3.80831	131573
473936	2.97408	10	159355	0.0340596	400859	2.51551	159355	0.0612548	473936	2.97408	159355
458003	3.10417	6	147544	0.0265458	401769	2.72304	147544	0.0641054	458003	3.10417	147544
410913	4.34449	8	94582.4	0.0230968	366578	3.87575	94582.4	0.0714742	410913	4.34449	94582.4
677825	3.91683	9	173055	0.014581	630499	3.64335	173055	0.063858	677825	3.91683	173055
737635	3.36453	14	219239	0.0339602	624199	2.84712	219239	0.0648159	737635	3.36453	219239
629922	3.48968	7	180510	0.0303412	542477	3.00524	180510	0.0633092	629922	3.48968	180510
521283	3.72361	11	139994	0.0197893	472630	3.37608	139994	0.0606779	521283	3.72361	139994
470959	4.11357	10	114489	0.0177904	431213	3.76641	114489	0.058215	470959	4.11357	114489
564879	4.18676	13	134920	0.0225736	505222	3.7446	134920	0.0774402	564879	4.18676	134920
578529	3.86877	17	149538	0.0326207	492744	3.2951	149538	0.0439598	578529	3.86877	149538
403796	3.72862	16	108296	0.00972957	384713	3.5524	108296	0.0555502	403796	3.72862	108296
719243	3.81822	7	188371	0.0361179	602323	3.19754	188371	0.0546871	719243	3.81822	188371
582034	4.10204	13	141889	0.0314087	498648	3.51436	141889	0.0645164	582034	4.10204	141889
681840	4.05035	15	168341	0.028282	593091	3.52315	168341	0.0673749	681840	4.05035	168341
504968	2.96999	11	170024	0.043837	407475	2.39657	170024	0.073332	504968	2.96999	170024
515097	4.27727	11	120427	0.035317	433034	3.59583	120427	0.0673331	515097	4.27727	120427
426237	3.80327	8	112071	0.0466358	339370	3.02817	112071	0.0611914	426237	3.80327	112071
758363	3.74008	8	202766	0.0167677	697860	3.44169	202766	0.0575231	758363	3.74008	202766
522030	3.21716	10	162264	0.0509876	407106	2.50891	162264	0.0557993	522030	3.21716	162264
451715	2.70392	12	167059	0.0478273	357615	2.14065	167059	0.0638644	451715	2.70392	167059
517808	3.33208	10	155401	0.0510748	403646	2.59745	155401	0.0673255	517808	3.33208	155401
716187	3.92718	14	182367	0.0164841	659969	3.61892	182367	0.0643653	716187	3.92718	182367
550992	3.63624	12	151528	0.0343083	465474	3.07187	151528	0.0780767	550992	3.63624	151528
665954	4.11089	14	161998	0.0389148	550230	3.39653	161998	0.0605482	665954	4.11089	161998
582308	2.72175	7	213946	0.0554504	444594	2.07806	213946	0.0621023	582308	2.72175	213946
528691	4.10138	11	128906	0.0524917	409363	3.17568	128906	0.074526	528691	4.10138	128906
553693	3.40146	17	162781	0.0274696	483531	2.97044	162781	0.0682963	553693	3.40146	162781
586706	2.97158	14	197439	0.0351037	493743	2.50074	197439	0.0590749	586706	2.97158	197439
726234	3.76948	11	192661	0.0374879	604173	3.13593	192661	0.0706546	726234	3.76948	192661
728741	3.9285	15	185501	0.0198342	660580	3.56106	185501	0.0369684	728741	3.9285	185501
671328	3.83233	9	175175	0.027623	585822	3.34421	175175	0.0802351	671328	3.83233	175175
318161	3.41295	13	93221.7	0.0479921	251684	2.69985	93221.7	0.0548109	318161	3.41295	93221.7
833065	3.07747	16	270698	0.0352918	700430	2.5875	270698	0.0589239	833065	3.07747	270698
584051	3.12977	7	186611	0.0038816	572847	3.06973	186611	0.0567655	584051	3.12977	186611
567995	2.9873	13	190137	0.0453283	455073	2.3934	190137	0.0705959	567995	2.9873	190137
565574	3.94321	12	143430	0.0335864	479463	3.34284	143430	0.036131	565574	3.94321	143430
582707	4.25478	6	136954	0.0236328	518477	3.78578	136954	0.0646711	582707	4.25478	136954
650280	3.30371	12	196833	0.0362292	544278	2.76518	196833	0.0433743	650280	3.30371	196833
706401	4.20136	14	168136	0.0182253	645404	3.83857	168136	0.0648256	706401	4.20136	168136
613069	3.75422	10	163301	0.0253321	540987	3.31282	163301	0.0639183	613069	3.75422	163301
580956	2.98698	11	194496	0.0217686	521652	2.68206	194496	0.0705563	580956	2.98698	194496
798382	4.11427	13	194052	0.0237841	709854	3.65806	194052	0.0745331	798382	4.11427	194052
651673	3.31181	11	196772	0.0189918	593166	3.01448	196772	0.0588095	651673	3.31181	196772
524250	3.1578	9	166018	0.0343466	442800	2.66719	166018	0.0660061	524250	3.1578	166018
386710	3.39205	8	114005	0.0168336	355743	3.12042	114005	0.0781271	386710	3.39205	114005
532602	4.45244	13	119620	0.0350957	448229	3.7471	119620	0.0530496	532602	4.45244	119620
554894	3.84601	11	144278	0.0370318	462647	3.20664	144278	0.0498035	554894	3.84601	144278
443818	3.65665	10	121373	0.0245102	393209	3.23968	121373	0.0603966	443818	3.65665	121373
588870	3.48566	11	168941	0.0259617	518041	3.0664	168941	0.0700726	588870	3.48566	168941
499987	3.69597	18	135279	0.0268819	437881	3.23687	135279	0.0530304	499987	3.69597	135279
608845	4.45472	14	136674	0.0306992	523416	3.82966	136674	0.0361846	608845	4.45472	136674
754325	5.29305	8	142512	0.0216472	677725	4.75555	142512	0.0681174	754325	5.29305	142512
617143	4.27479	11	144368	0.028987	534979	3.70566	144368	0.0509222	617143	4.27479	144368
670308	3.56596	14	187974	0.0203481	606083	3.2243	187974	0.0577803	670308	3.56596	187974
729313	3.56814	13	204396	0.0444595	586754	2.87068	204396	0.0642276	729313	3.56814	204396
579319	3.80883	6	152099	0.0361894	484978	3.18857	152099	0.0468269	579319	3.80883	152099
426972	2.8574	16	149427	0.0205786	385627	2.58071	149427	0.0779272	426972	2.8574	149427
599866	4.00362	11	149831	0.0557439	457363	3.05253	149831	0.0383508	599866	4.00362	149831
537880	4.21031	13	127753	0.0486449	424173	3.32026	127753	0.0535238	537880	4.21031	127753
535485	2.96924	18	180344	0.019256	486778	2.69916	180344	0.0645483	535485	2.96924	180344
655100	3.72884	11	175684	0.0277463	571318	3.25196	175684	0.051117	655100	3.72884	175684
508332	2.85382	7	178123	0.0391326	419558	2.35544	178123	0.0738404	508332	2.85382	178123
657349	3.3588	10	195710	0.0165582	605528	3.09402	195710	0.044109	657349	3.3588	195710
632738	4.37288	7	144696	0.0189971	575916	3.98018	144696	0.0719713	632738	4.37288	144696
598442	3.60635	13	165941	0.0465293	476722	2.87284	165941	0.0456549	598442	3.60635	165941
456347	4.03746	6	113028	0.0150242	423558	3.74737	113028	0.0725904	456347	4.03746	113028
428325	4.59912	10	93131.8	0.0243935	379699	4.077	93131.8	0.053018	428325	4.59912	93131.8
637725	3.36579	13	189473	0.0462269	508750	2.68508	189473	0.0739827	637725	3.36579	189473
587502	3.35558	9	175082	0.0365056	491079	2.80485	175082	0.0735944	587502	3.35558	175082
643487	4.29042	21	149982	0.0445129	517572	3.45089	149982	0.050983	643487	4.29042	149982
619990	3.79967	15	163169	0.0431431	501956	3.07629	163169	0.0755772	619990	3.79967	163169
534865	3.861	16	138530	0.0308111	459567	3.31745	138530	0.0598747	534865	3.861	138530
513589	3.33832	4	153846	0.0232656	457798	2.97568	153846	0.0548469	513589	3.33832	153846
506498	3.52149	15	143831	0.0407699	414767	2.88372	143831	0.0570095	506498	3.52149	143831
666413	2.80338	11	237718	0.0245923	590185	2.48271	237718	0.0623971	666413	2.80338	237718
960649	3.49879	17	274566	0.0174256	881153	3.20925	274566	0.0748023	960649	3.49879	274566
534485	3.52124	13	151789	0.0506896	417410	2.74994	151789	0.0785455	534485	3.52124	151789
707041	4.09648	10	172597	0.0253684	623799	3.61419	172597	0.0583127	707041	4.09648	172597
555390	4.01096	14	138468	0.0163455	512143	3.69864	138468	0.0800861	555390	4.01096	138468
634564	2.86829	11	221234	0.0383717	525668	2.37607	221234	0.0616114	634564	2.86829	221234
661230	3.85128	14	171691	0.0374875	550095	3.20398	171691	0.0635377	661230	3.85128	171691
638149	3.87342	9	164751	0.012376	600085	3.64238	164751	0.0626124	638149	3.87342	164751
652584	3.58429	10	182068	0.0355634	547965	3.00967	182068	0.0673549	652584	3.58429	182068
657881	3.67747	16	178895	0.0385606	544487	3.04361	178895	0.0528371	657881	3.67747	178895
470592	3.21462	11	146391	0.0402419	386343	2.63911	146391	0.0641627	470592	3.21462	146391
486749	4.27422	12	113880	0.0291723	421565	3.70183	113880	0.0562211	486749	4.27422	113880
610808	4.25748	13	143467	0.035193	513805	3.58134	143467	0.0660895	610808	4.25748	143467
564903	2.83408	13	199325	0.0357453	473924	2.37764	199325	0.0722671	564903	2.83408	199325
683724	4.16367	14	164212	0.0285454	593968	3.61709	164212	0.068731	683724	4.16367	164212
570709	3.6078	13	158187	0.0309462	490044	3.09787	158187	0.0531851	570709	3.6078	158187
634754	4.17738	12	151950	0.0353497	533544	3.5113	151950	0.038994	634754	4.17738	151950
466231	3.11289	19	149774	0.0376764	387518	2.58734	149774	0.0682405	466231	3.11289	149774
547649	2.88116	8	190079	0.0244218	485410	2.55372	190079	0.0701207	547649	2.88116	190079
349793	3.16981	16	110351	0.0276918	305138	2.76515	110351	0.0502867	349793	3.16981	110351
512769	4.45289	19	115154	0.0436151	414209	3.597	115154	0.0574761	512769	4.45289	115154
573147	4.60899	14	124354	0.0244498	507940	4.08462	124354	0.0574407	573147	4.60899	124354
731432	2.80239	10	261003	0.0570973	554114	2.12302	261003	0.0570381	731432	2.80239	261003
447815	3.85376	12	116202	0.0198443	405910	3.49313	116202	0.0543224	447815	3.85376	116202
577049	4.379	13	131776	0.023867	512855	3.89186	131776	0.059829	577049	4.379	131776
678100	4.31618	8	157106	0.026044	596298	3.79551	157106	0.0603948	678100	4.31618	157106
609159	4.00108	9	152249	0.0397389	501313	3.29273	152249	0.0401703	609159	4.00108	152249
910232	4.79905	12	189669	0.034255	769155	4.05524	189669	0.0541801	910232	4.79905	189669
635466	3.80627	10	166953	0.0221001	569673	3.41218	166953	0.0420999	635466	3.80627	166953
543020	3.53558	16	153587	0.0119497	511707	3.3317	153587	0.0519216	543020	3.53558	153587
470643	2.97301	12	158305	0.044391	378770	2.39266	158305	0.0388563	470643	2.97301	158305
535890	3.87942	13	138137	0.0299162	462451	3.34778	138137	0.0529846	535890	3.87942	138137
516790	3.44266	17	150113	0.0326006	440203	2.93246	150113	0.0585802	516790	3.44266	150113
566689	4.88589	12	115985	0.0456195	453395	3.90909	115985	0.0585836	566689	4.88589	115985
633803	4.56076	8	138969	0.0373633	527594	3.7965	138969	0.0834414	633803	4.56076	138969
662395	3.30556	7	200388	0.0192313	602218	3.00525	200388	0.0606973	662395	3.30556	200388
687050	3.82458	11	179641	0.0296322	593715	3.30501	179641	0.0660712	687050	3.82458	179641
652158	3.83216	15	170180	0.0361635	546023	3.2085	170180	0.0669943	652158	3.83216	170180
302427	3.73967	11	80869.9	0.0169461	278055	3.4383	80869.9	0.0588417	302427	3.73967	80869.9
542852	3.20864	18	169185	0.0138195	506849	2.99583	169185	0.0722238	542852	3.20864	169185
728060	4.23394	18	171958	0.0312851	624127	3.62954	171958	0.0508536	728060	4.23394	171958
404691	4.17062	14	97033.7	0.0313292	346846	3.57449	97033.7	0.0623778	404691	4.17062	97033.7
686194	3.63461	12	188795	0.0208151	619030	3.27885	188795	0.056771	686194	3.63461	188795
782896	3.71621	12	210670	0.0383518	648607	3.07878	210670	0.0667585	782896	3.71621	210670
500057	3.3603	9	148813	0.0338072	423469	2.84564	148813	0.0557024	500057	3.3603	148813
445076	3.66454	14	121455	0.0365764	371901	3.06206	121455	0.0518738	445076	3.66454	121455
605827	2.41699	11	250653	0.0172018	556305	2.21942	250653	0.0614567	605827	2.41699	250653
454086	4.25937	16	106609	0.0335196	385074	3.61203	106609	0.0551804	454086	4.25937	106609
551599	3.40905	11	161804	0.0397823	453849	2.80492	161804	0.0589569	551599	3.40905	161804
615548	3.30959	9	185989	0.0365415	514433	2.76592	185989	0.0508098	615548	3.30959	185989
469569	3.906	12	120217	0.016277	433150	3.60306	120217	0.0587827	469569	3.906	120217
625568	3.61584	4	173008	0.0346718	527548	3.04927	173008	0.0455451	625568	3.61584	173008
635706	4.5496	8	139728	0.0138999	593309	4.24617	139728	0.0550689	635706	4.5496	139728
666893	3.70892	18	179808	0.00925276	636878	3.54199	179808	0.0681303	666893	3.70892	179808
518333	3.13939	9	165106	0.0253517	457346	2.77001	165106	0.0681872	518333	3.13939	165106
469756	3.67446	14	127843	0.0195868	426336	3.33482	127843	0.0526204	469756	3.67446	127843
592383	4.69809	14	126090	0.0336493	502038	3.98158	126090	0.0746902	592383	4.69809	126090
340979	3.92805	21	86806.1	0.0416149	278094	3.20362	86806.1	0.0497597	340979	3.92805	86806.1
551528	4.32962	6	127385	0.0449906	442594	3.47446	127385	0.068645	551528	4.32962	127385
766326	4.43033	14	172973	0.0243285	679543	3.92862	172973	0.0597398	766326	4.43033	172973
400220	3.53809	12	113117	0.0488161	315357	2.78787	113117	0.0599132	400220	3.53809	113117
577948	4.12255	11	140192	0.0342069	488485	3.48441	140192	0.0711604	577948	4.12255	140192
354772	3.21956	6	110193	0.042256	288455	2.61773	110193	0.0692026	354772	3.21956	110193
356079	2.98462	19	119305	0.0300981	307011	2.57333	119305	0.0422464	356079	2.98462	119305
484313	3.6177	13	133873	0.0399083	398245	2.9748	133873	0.0654324	484313	3.6177	133873
267124	3.43889	11	77677.5	0.0388993	220722	2.84152	77677.5	0.066427	267124	3.43889	77677.5
536901	3.82736	11	140280	0.0303671	462311	3.29563	140280	0.054059	536901	3.82736	140280
506473	4.38139	10	115597	0.0483329	400000	3.46032	115597	0.0941467	506473	4.38139	115597
517607	4.37236	18	118382	0.015037	480386	4.05795	118382	0.0602334	517607	4.37236	118382
653936	3.62724	13	180285	0.0312464	560690	3.11003	180285	0.0777377	653936	3.62724	180285
636626	3.51241	11	181251	0.0342822	537884	2.96763	181251	0.0667958	636626	3.51241	181251
399396	3.36573	17	118666	0.0351739	335999	2.83147	118666	0.0625552	399396	3.36573	118666
564428	4.73974	8	119084	0.0172013	518291	4.35232	119084	0.053617	564428	4.73974	119084
476312	3.54357	5	134416	0.0250766	420833	3.13083	134416	0.082022	476312	3.54357	134416
508985	4.73709	12	107447	0.0194075	462344	4.30301	107447	0.0651705	508985	4.73709	107447
575653	3.73878	19	153968	0.0499198	451212	2.93055	153968	0.050333	575653	3.73878	153968
467363	3.59558	17	129983	0.0274205	408238	3.14071	129983	0.0695538	467363	3.59558	129983
680765	3.6808	8	184950	0.0294682	588752	3.1833	184950	0.0503955	680765	3.6808	184950
610713	2.47028	7	247224	0.0406788	500327	2.02378	247224	0.0688849	610713	2.47028	247224
894057	2.66701	10	335228	0.0316951	764907	2.28175	335228	0.0628618	894057	2.66701	335228
307716	3.44262	19	89384.3	0.0340682	260258	2.91167	89384.3	0.0549986	307716	3.44262	89384.3
530958	2.4611	12	215740	0.0279913	462501	2.14379	215740	0.0800164	530958	2.4611	215740
579526	3.83823	13	150988	0.0373437	482458	3.19535	150988	0.0578982	579526	3.83823	150988
855269	3.06394	11	279140	0.0289022	741707	2.65711	279140	0.0550344	855269	3.06394	279140
556308	4.04401	10	137564	0.039551	458233	3.33106	137564	0.0467459	556308	4.04401	137564
589998	3.52985	10	167145	0.0243144	523220	3.13033	167145	0.0640099	589998	3.52985	167145
626547	3.49792	17	179120	0.0315827	536332	2.99426	179120	0.0617286	626547	3.49792	179120
436495	3.27065	17	133458	0.0509523	340458	2.55105	133458	0.0728814	436495	3.27065	133458
923672	3.94088	14	234382	0.0184385	843032	3.59682	234382	0.049891	923672	3.94088	234382
906707	3.80772	9	238123	0.0314123	776793	3.26215	238123	0.0636809	906707	3.80772	238123
463302	3.44655	14	134425	0.0341827	391631	2.91339	134425	0.0706888	463302	3.44655	134425
611380	2.92794	10	208809	0.0376855	508139	2.43351	208809	0.0644986	611380	2.92794	208809
455249	4.18665	16	108738	0.0414225	371633	3.41768	108738	0.0434101	455249	4.18665	108738
476786	3.82002	13	124813	0.0318374	407631	3.26594	124813	0.0509005	476786	3.82002	124813
449901	3.23296	14	139161	0.0196705	408148	2.93293	139161	0.0697259	449901	3.23296	139161
598260	2.87167	15	208332	0.0409418	489505	2.34964	208332	0.0560235	598260	2.87167	208332
484151	3.13803	16	154285	0.0186903	441336	2.86053	154285	0.0666161	484151	3.13803	154285
686283	3.56797	15	192346	0.0282863	596943	3.10349	192346	0.0450412	686283	3.56797	192346
345234	4.06496	10	84929.2	0.0150333	320414	3.77272	84929.2	0.0577129	345234	4.06496	84929.2
644701	3.18162	11	202633	0.0204072	582762	2.87595	202633	0.0582876	644701	3.18162	202633
599593	4.14137	17	144781	0.0379499	497708	3.43766	144781	0.0750836	599593	4.14137	144781
538601	4.10526	9	131198	0.0362035	450860	3.43649	131198	0.0626073	538601	4.10526	131198
572725	3.73211	13	153459	0.0278671	499185	3.25289	153459	0.0800632	572725	3.73211	153459
609313	3.89084	23	156602	0.0372043	507597	3.24132	156602	0.0513904	609313	3.89084	156602
366680	3.77418	12	97154.9	0.0306662	315281	3.24513	97154.9	0.0625313	366680	3.77418	97154.9
642262	3.43611	11	186916	0.0312061	550789	2.94672	186916	0.0734968	642262	3.43611	186916
520623	3.34833	14	155487	0.0281913	453058	2.91379	155487	0.0469771	520623	3.34833	155487
515759	3.30403	11	156100	0.0326793	439157	2.8133	156100	0.0568694	515759	3.30403	156100
599106	3.46477	16	172914	0.0398786	492709	2.84945	172914	0.064916	599106	3.46477	172914
607787	3.63503	9	167203	0.0229687	542550	3.24487	167203	0.0609598	607787	3.63503	167203
505750	3.3681	15	150159	0.0209486	455949	3.03645	150159	0.0711197	505750	3.3681	150159
737045	4.16635	8	176904	0.0378337	612147	3.46033	176904	0.0467229	737045	4.16635	176904
675067	3.34848	12	201604	0.0264762	592383	2.93835	201604	0.0514251	675067	3.34848	201604
687970	4.35792	12	157867	0.0589176	516724	3.27317	157867	0.0455149	687970	4.35792	157867
577431	4.38702	8	131623	0.0282813	502274	3.81601	131623	0.0300429	577431	4.38702	131623
574673	4.40389	8	130492	0.0357101	482203	3.69526	130492	0.0749972	574673	4.40389	130492
511840	3.28086	15	156008	0.026226	449696	2.88252	156008	0.0561879	511840	3.28086	156008
755952	4.44711	13	169987	0.0214685	679782	3.99901	169987	0.0587578	755952	4.44711	169987
595847	3.38794	11	175873	0.0174055	546593	3.10788	175873	0.0634016	595847	3.38794	175873
643311	3.61122	12	178142	0.0288252	558101	3.1329	178142	0.0523603	643311	3.61122	178142
586412	3.46228	22	169372	0.0316621	501782	2.96261	169372	0.0721288	586412	3.46228	169372
444580	3.51516	14	126475	0.0321689	379486	3.00048	126475	0.0434806	444580	3.51516	126475
655129	3.29851	14	198614	0.0384016	542625	2.73206	198614	0.0575929	655129	3.29851	198614
656539	3.21062	10	204490	0.0239372	583303	2.85248	204490	0.0678338	656539	3.21062	204490
506791	3.87669	15	130728	0.0383382	419889	3.21194	130728	0.0607306	506791	3.87669	130728
704371	3.48646	16	202031	0.0473072	559025	2.76703	202031	0.0714306	704371	3.48646	202031
603142	3.51786	13	171451	0.0239886	535727	3.12466	171451	0.0642087	603142	3.51786	171451
479485	3.34448	15	143366	0.027467	418731	2.92071	143366	0.042693	479485	3.34448	143366
422808	4.21837	15	100230	0.0302633	364252	3.63415	100230	0.055259	422808	4.21837	100230
480986	3.20204	17	150212	0.0301196	414662	2.76051	150212	0.0611278	480986	3.20204	150212
544747	3.00266	13	181421	0.0443441	438507	2.41707	181421	0.0549922	544747	3.00266	181421
390377	3.93507	12	99204.7	0.0245945	345720	3.48492	99204.7	0.0498209	390377	3.93507	99204.7
536173	4.01467	9	133554	0.0380819	444782	3.33036	133554	0.0706928	536173	4.01467	133554
566179	3.56202	14	158949	0.0398474	465699	2.92987	158949	0.0484941	566179	3.56202	158949
360306	4.25546	8	84669.1	0.0391505	297358	3.512	84669.1	0.0723346	360306	4.25546	84669.1
705299	3.81914	7	184675	0.0273254	616358	3.33753	184675	0.0469104	705299	3.81914	184675
827017	3.92768	16	210561	0.046187	659884	3.13393	210561	0.0531098	827017	3.92768	210561
703099	4.61429	11	152374	0.0344244	593639	3.89593	152374	0.0593558	703099	4.61429	152374
399644	4.07069	13	98176	0.00878799	382537	3.89644	98176	0.0514507	399644	4.07069	98176
490104	3.39576	10	144328	0.0190565	445961	3.08991	144328	0.0644596	490104	3.39576	144328
382047	3.49902	17	109187	0.0264202	335344	3.07128	109187	0.0504879	382047	3.49902	109187
349269	4.18577	8	83442	0.0258572	307415	3.68418	83442	0.057651	349269	4.18577	83442
440375	3.69754	10	119099	0.030403	379129	3.1833	119099	0.0548173	440375	3.69754	119099
587354	3.48125	8	168719	0.0402361	482215	2.85809	168719	0.0614559	587354	3.48125	168719
717401	3.29088	9	217997	0.0299045	619124	2.84006	217997	0.0564757	717401	3.29088	217997
636145	4.02151	11	158186	0.053054	491250	3.10553	158186	0.0539272	636145	4.02151	158186
651645	3.99277	10	163206	0.0269267	570576	3.49604	163206	0.0564486	651645	3.99277	163206
727050	4.27448	17	170091	0.0328995	618406	3.63574	170091	0.0600137	727050	4.27448	170091
532054	3.64943	10	145791	0.00578522	516927	3.54567	145791	0.0761295	532054	3.64943	145791
564955	3.89717	16	144965	0.0201298	511371	3.52754	144965	0.0683189	564955	3.89717	144965
615881	2.9932	10	205760	0.0298832	531566	2.58342	205760	0.0590367	615881	2.9932	205760
679172	4.13303	14	164328	0.029045	588584	3.58177	164328	0.0760433	679172	4.13303	164328
335331	4.28185	22	78314.4	0.0265963	294086	3.7552	78314.4	0.0618446	335331	4.28185	78314.4
578048	4.04908	10	142760	0.0345356	487794	3.41688	142760	0.0671164	578048	4.04908	142760
578881	3.11076	18	186090	0.0340201	489716	2.63161	186090	0.0530018	578881	3.11076	186090
623683	4.72987	16	131861	0.0198853	565207	4.2864	131861	0.0823464	623683	4.72987	131861
661101	3.12354	17	211651	0.0255652	582709	2.75316	211651	0.0406846	661101	3.12354	211651
428622	3.29945	5	129907	0.0375072	356549	2.74464	129907	0.0530476	428622	3.29945	129907
649495	3.54871	13	183023	0.0334023	551098	3.01109	183023	0.0568835	649495	3.54871	183023
698213	3.17525	14	219892	0.0112454	660245	3.00258	219892	0.0586823	698213	3.17525	219892
839016	4.11787	6	203750	0.0292918	726236	3.56435	203750	0.0497849	839016	4.11787	203750
518512	3.19054	14	162515	0.0447376	416603	2.56347	162515	0.0470765	518512	3.19054	162515
516213	2.50968	19	205689	0.0293824	446627	2.17138	205689	0.0489246	516213	2.50968	205689
452416	3.57479	13	126557	0.0206312	408501	3.2278	126557	0.062506	452416	3.57479	126557
718237	3.95295	10	181697	0.0322884	612721	3.37222	181697	0.0535241	718237	3.95295	181697
640166	4.61022	14	138858	0.0312491	548876	3.95279	138858	0.0495803	640166	4.61022	138858
546244	4.11592	8	132715	0.0251173	482524	3.63579	132715	0.0637043	546244	4.11592	132715
570033	3.33021	11	171170	0.0289576	494211	2.88725	171170	0.063101	570033	3.33021	171170
578861	3.57476	10	161930	0.0390303	478006	2.95193	161930	0.069186	578861	3.57476	161930
787264	4.54801	13	173101	0.0348545	663321	3.83199	173101	0.0419868	787264	4.54801	173101
576545	4.09971	16	140631	0.0378037	478913	3.40547	140631	0.0629218	576545	4.09971	140631
723453	3.32939	18	217293	0.0170366	664856	3.05972	217293	0.0729985	723453	3.32939	217293
322569	3.86108	10	83543.9	0.0162271	297625	3.5625	83543.9	0.0570177	322569	3.86108	83543.9
605359	3.44006	13	175973	0.0207025	546408	3.10506	175973	0.0563244	605359	3.44006	175973
677718	2.54381	15	266418	0.0375564	563625	2.11557	266418	0.0766739	677718	2.54381	266418
656738	3.04667	10	215559	0.0103969	623637	2.89312	215559	0.0553349	656738	3.04667	215559
447987	4.09891	10	109294	0.0336222	379714	3.47424	109294	0.0327171	447987	4.09891	109294
575875	3.75611	16	153317	0.0228542	514351	3.35482	153317	0.0527587	575875	3.75611	153317
691683	3.95946	12	174691	0.0233813	616197	3.52735	174691	0.0552372	691683	3.95946	174691
647403	3.62201	9	178741	0.0240305	574924	3.21651	178741	0.0442754	647403	3.62201	178741
562923	2.93705	13	191663	0.0264729	493982	2.57735	191663	0.0540474	562923	2.93705	191663
798414	3.75026	13	212896	0.0406224	654278	3.07323	212896	0.052569	798414	3.75026	212896
463761	3.88224	15	119457	0.0436146	374622	3.13604	119457	0.054626	463761	3.88224	119457
506510	3.78176	13	133935	0.0247935	448132	3.34589	133935	0.0629379	506510	3.78176	133935
483231	4.36901	16	110604	0.0149869	448593	4.05584	110604	0.0415464	483231	4.36901	110604
433402	3.71277	10	116733	0.0424933	351985	3.01531	116733	0.0625356	433402	3.71277	116733
429671	3.83205	4	112126	0.028891	372640	3.32341	112126	0.0769473	429671	3.83205	112126
534909	2.63235	6	203206	0.0353762	449561	2.21234	203206	0.043853	534909	2.63235	203206
660990	4.30838	13	153420	0.0364669	552609	3.60194	153420	0.0568961	660990	4.30838	153420
560925	4.43485	12	126481	0.0334962	475730	3.76127	126481	0.0584383	560925	4.43485	126481
616043	4.15774	10	148168	0.0298966	531671	3.58831	148168	0.0539758	616043	4.15774	148168
634660	4.162	10	152489	0.0307113	545577	3.57781	152489	0.0613804	634660	4.162	152489
572141	3.95386	10	144704	0.0256676	504046	3.48328	144704	0.0612012	572141	3.95386	144704
435700	3.66464	15	118893	0.0341243	368404	3.09862	118893	0.0496188	435700	3.66464	118893
412412	4.53867	13	90866.2	0.0418511	335972	3.69743	90866.2	0.0516276	412412	4.53867	90866.2
548779	3.52484	15	155689	0.0330179	466507	2.99641	155689	0.0657716	548779	3.52484	155689
704334	3.14665	15	223837	0.0337551	596610	2.66538	223837	0.066077	704334	3.14665	223837
582102	3.86531	12	150597	0.0404659	477375	3.16989	150597	0.0662101	582102	3.86531	150597
604273	3.91164	15	154481	0.0292521	523148	3.3865	154481	0.0703942	604273	3.91164	154481
530873	3.96733	17	133811	0.0244634	470444	3.51573	133811	0.0685469	530873	3.96733	133811
578591	3.67142	12	157593	0.0133809	541388	3.43535	157593	0.0699076	578591	3.67142	157593
483378	4.29145	20	112637	0.0188192	440353	3.90948	112637	0.0556422	483378	4.29145	112637
705035	4.2912	8	164298	0.0362537	590039	3.59127	164298	0.0764957	705035	4.2912	164298
389579	3.29525	7	118224	0.0421519	316913	2.68061	118224	0.0754096	389579	3.29525	118224
600957	3.98967	9	150628	0.0125561	564609	3.74836	150628	0.0531938	600957	3.98967	150628
748842	3.52145	16	212652	0.0272739	654575	3.07815	212652	0.0477875	748842	3.52145	212652
715399	3.47673	11	205768	0.0414405	583951	2.83791	205768	0.0585363	715399	3.47673	205768
467653	4.04326	12	115662	0.0146168	434924	3.7603	115662	0.0462012	467653	4.04326	115662
430535	3.92873	9	109586	0.0106799	408263	3.7255	109586	0.055062	430535	3.92873	109586
615661	4.14866	9	148400	0.0198054	558155	3.76115	148400	0.0446571	615661	4.14866	148400
533333	3.72356	14	143232	0.0477034	422481	2.94962	143232	0.0631774	533333	3.72356	143232
703921	3.98368	10	176701	0.0382423	583486	3.3021	176701	0.0637672	703921	3.98368	176701
603988	3.86614	15	156225	0.0233028	538279	3.44554	156225	0.0598065	603988	3.86614	156225
390017	3.79399	16	102799	0.022317	349265	3.39756	102799	0.0454212	390017	3.79399	102799
783441	3.4721	11	225639	0.0406364	641965	2.8451	225639	0.0657045	783441	3.4721	225639
551621	3.6078	12	152897	0.0387013	456234	2.98393	152897	0.0636532	551621	3.6078	152897
350201	2.76953	13	126448	0.0322014	298879	2.36365	126448	0.0583086	350201	2.76953	126448
428039	3.75425	15	114014	0.029237	370601	3.25047	114014	0.0601704	428039	3.75425	114014
292164	3.8976	12	74960	0.0176989	267627	3.57026	74960	0.0435012	292164	3.8976	74960
721769	4.43873	8	162607	0.0116835	681044	4.18828	162607	0.0571805	721769	4.43873	162607
513910	3.29015	12	156197	0.0379518	426581	2.73105	156197	0.0547994	513910	3.29015	156197
748410	4.04569	10	184990	0.040759	612899	3.31315	184990	0.0687331	748410	4.04569	184990
546159	3.93042	10	138957	0.00673432	528135	3.8007	138957	0.0729157	546159	3.93042	138957
585189	3.84971	12	152008	0.0314595	501228	3.29737	152008	0.0402196	585189	3.84971	152008
560520	3.39569	7	165068	0.0204108	506660	3.06939	165068	0.0502766	560520	3.39569	165068
992398	4.14902	12	239189	0.0205987	896212	3.74689	239189	0.0536166	992398	4.14902	239189
726064	4.38017	10	165762	0.0521787	563025	3.39659	165762	0.0539098	726064	4.38017	165762
625798	4.27353	11	146436	0.00787154	601740	4.10923	146436	0.0720976	625798	4.27353	146436
338117	4.07472	11	82979.1	0.0248883	299009	3.60342	82979.1	0.072441	338117	4.07472	82979.1
729411	3.39148	17	215072	0.0255826	642864	2.98907	215072	0.0847135	729411	3.39148	215072
665515	3.20083	14	207920	0.0336914	563902	2.71212	207920	0.0668137	665515	3.20083	207920
472486	5.03628	15	93816.5	0.0416575	385269	4.10662	93816.5	0.0543593	472486	5.03628	93816.5
479660	3.47763	9	137927	0.0355505	402788	2.9203	137927	0.0636727	479660	3.47763	137927
574486	3.37249	10	170345	0.0431935	465002	2.72977	170345	0.0545502	574486	3.37249	170345
692269	2.43741	13	284019	0.023083	617619	2.17457	284019	0.0499072	692269	2.43741	284019
743783	3.03204	10	245308	0.0187209	677907	2.76349	245308	0.0600956	743783	3.03204	245308
532366	3.30831	13	160918	0.0294376	460479	2.86158	160918	0.0597148	532366	3.30831	160918
539330	3.27975	11	164442	0.0229004	481601	2.92869	164442	0.0506	539330	3.27975	164442
451120	3.10263	15	145399	0.0280887	392771	2.70133	145399	0.0274128	451120	3.10263	145399
455091	3.94902	14	115242	0.00569563	442350	3.83845	115242	0.0774492	455091	3.94902	115242
612916	3.76488	16	162798	0.0313016	525379	3.22718	162798	0.0718852	612916	3.76488	162798
704281	4.21184	9	167215	0.0132036	659572	3.94447	167215	0.0494946	704281	4.21184	167215
647148	4.09877	10	157888	0.0184305	590673	3.74108	157888	0.0851192	647148	4.09877	157888
564889	3.22857	13	174966	0.0402024	463846	2.65107	174966	0.0454904	564889	3.22857	174966
672120	3.96416	13	169549	0.0346686	566814	3.34307	169549	0.0439051	672120	3.96416	169549
813116	3.65039	15	222748	0.0252497	717801	3.22249	222748	0.053919	813116	3.65039	222748
505530	4.57771	12	110433	0.039418	416674	3.77309	110433	0.0518499	505530	4.57771	110433
507173	3.97965	15	127441	0.0375081	421890	3.31046	127441	0.0571162	507173	3.97965	127441
371932	3.7493	11	99200.5	0.0224089	332920	3.35604	99200.5	0.0626667	371932	3.7493	99200.5
594976	5.17299	8	115016	0.0306688	511569	4.4478	115016	0.0749891	594976	5.17299	115016
493641	4.20313	16	117446	0.0254595	435330	3.70664	117446	0.0688278	493641	4.20313	117446
449686	3.82949	12	117427	0.0480939	355556	3.02789	117427	0.0531782	449686	3.82949	117427
613909	2.80488	15	218872	0.0121484	577940	2.64054	218872	0.0699366	613909	2.80488	218872
427537	2.96179	14	144351	0.0203039	386657	2.67859	144351	0.0666055	427537	2.96179	144351
647625	2.75636	10	234956	0.0311285	555597	2.36468	234956	0.060707	647625	2.75636	234956
582137	3.8808	13	150004	0.0222045	521598	3.47722	150004	0.0481622	582137	3.8808	150004
435761	5.07912	13	85794.6	0.0306905	374634	4.36664	85794.6	0.0496286	435761	5.07912	85794.6
409913	3.25288	13	126015	0.0270581	358688	2.84638	126015	0.0708587	409913	3.25288	126015
465901	3.15486	11	147677	0.0297988	402283	2.72407	147677	0.0622808	465901	3.15486	147677
520562	4.25474	15	122349	0.0228192	465027	3.80083	122349	0.0600263	520562	4.25474	122349
450434	4.5085	9	99907.7	0.0274761	393344	3.93707	99907.7	0.0483263	450434	4.5085	99907.7
582295	3.59702	12	161883	0.039964	478687	2.957	161883	0.0538097	582295	3.59702	161883
596824	2.99917	18	198997	0.0248965	527772	2.65217	198997	0.0624585	596824	2.99917	198997
592813	2.62511	13	225824	0.0379728	492026	2.1788	225824	0.0613885	592813	2.62511	225824
480114	3.77203	16	127283	0.0315876	410973	3.22883	127283	0.0842796	480114	3.77203	127283
575035	4.95207	11	116120	0.0240239	510674	4.39781	116120	0.0569971	575035	4.95207	116120
612662	3.64953	13	167874	0.0339082	518575	3.08906	167874	0.0483426	612662	3.64953	167874
712389	4.18683	14	170150	0.0436861	575265	3.38093	170150	0.0614671	712389	4.18683	170150
521651	3.54357	13	147211	0.0202795	471829	3.20512	147211	0.052756	521651	3.54357	147211
747634	4.2924	10	174176	0.0403267	613536	3.52251	174176	0.0647327	747634	4.2924	174176
640005	3.37168	10	189818	0.0246745	566570	2.98481	189818	0.0752212	640005	3.37168	189818
605179	3.36037	12	180093	0.0347065	510268	2.83335	180093	0.0578903	605179	3.36037	180093
634044	3.5285	8	179692	0.0274	553887	3.08242	179692	0.0697655	634044	3.5285	179692
513314	3.42961	15	149671	0.0182026	469042	3.13381	149671	0.0763302	513314	3.42961	149671
934436	3.06785	11	304590	0.0292166	809125	2.65644	304590	0.0557395	934436	3.06785	304590
826544	3.32504	14	248582	0.0233363	736502	2.96281	248582	0.0559892	826544	3.32504	248582
559348	3.67198	11	152329	0.00941516	533744	3.5039	152329	0.0634833	559348	3.67198	152329
539546	3.47723	15	155165	0.0349359	454424	2.92864	155165	0.0645281	539546	3.47723	155165
626096	4.35942	13	143619	0.0339372	529871	3.68942	143619	0.0601576	626096	4.35942	143619
467380	3.95328	18	118226	0.029348	404445	3.42095	118226	0.054504	467380	3.95328	118226
368505	3.21936	9	114465	0.025473	324954	2.83889	114465	0.0512088	368505	3.21936	114465
644392	3.50791	11	183697	0.0225812	576316	3.13732	183697	0.0583047	644392	3.50791	183697
592348	4.40554	10	134455	0.0304633	509817	3.79172	134455	0.044705	592348	4.40554	134455
466813	3.36443	12	138750	0.0186774	425559	3.0671	138750	0.0597184	466813	3.36443	138750
733368	3.54317	11	206981	0.0290834	635432	3.07	206981	0.0567769	733368	3.54317	206981
676117	3.97861	27	169938	0.026606	592930	3.4891	169938	0.0553038	676117	3.97861	169938
525473	3.53413	11	148685	0.0206869	474338	3.19022	148685	0.0738743	525473	3.53413	148685
603371	4.19483	8	143837	0.0193113	548340	3.81224	143837	0.0612078	603371	4.19483	143837
515594	4.3058	7	119744	0.0121418	485402	4.05366	119744	0.0661136	515594	4.3058	119744
572020	4.3958	15	130129	0.0176444	524120	4.0277	130129	0.0555099	572020	4.3958	130129
525072	3.71405	12	141374	0.0158966	485256	3.43242	141374	0.0439509	525072	3.71405	141374
670154	3.13723	10	213613	0.0310422	575164	2.69255	213613	0.078353	670154	3.13723	213613
490884	3.74329	16	131137	0.00711935	473778	3.61284	131137	0.0739369	490884	3.74329	131137
606698	4.12284	13	147155	0.0338045	513784	3.49144	147155	0.0474946	606698	4.12284	147155
757952	4.07234	11	186122	0.0244404	671751	3.6092	186122	0.0725113	757952	4.07234	186122
653935	4.40721	11	148378	0.0268995	572657	3.85944	148378	0.0704689	653935	4.40721	148378
810995	4.06077	14	199714	0.0315369	694375	3.47684	199714	0.0644183	810995	4.06077	199714
629178	3.80075	11	165540	0.0506601	491430	2.96864	165540	0.0495561	629178	3.80075	165540
791836	3.46764	16	228350	0.0227138	707725	3.09929	228350	0.056724	791836	3.46764	228350
627005	4.28988	8	146159	0.0157227	579956	3.96798	146159	0.0671785	627005	4.28988	146159
482343	3.31519	11	145495	0.0408553	394825	2.71367	145495	0.0601157	482343	3.31519	145495
583163	3.37306	19	172889	0.0430695	472307	2.73185	172889	0.0677061	583163	3.37306	172889
387856	3.67064	14	105665	0.036826	323699	3.06346	105665	0.0553739	387856	3.67064	105665
428941	3.54404	12	121032	0.0203243	387888	3.20485	121032	0.0587458	428941	3.54404	121032
574833	3.77323	10	152345	0.0239535	510670	3.35207	152345	0.0670897	574833	3.77323	152345
736751	3.34503	16	220252	0.0211103	663678	3.01326	220252	0.0450814	736751	3.34503	220252
586356	3.71863	19	157680	0.0266217	514173	3.26085	157680	0.0457666	586356	3.71863	157680
614150	4.24474	15	144685	0.0244083	544388	3.76258	144685	0.0579547	614150	4.24474	144685
667192	3.3305	5	200328	0.0278315	581622	2.90335	200328	0.0674128	667192	3.3305	200328
529552	3.37013	14	157131	0.0160052	489135	3.11291	157131	0.0453894	529552	3.37013	157131
553905	3.14429	12	176162	0.0168819	509428	2.89181	176162	0.0607043	553905	3.14429	176162
750566	3.7491	14	200199	0.0143844	698837	3.49071	200199	0.0682018	750566	3.7491	200199
551363	2.7808	5	198275	0.0120645	519274	2.61896	198275	0.0513387	551363	2.7808	198275
580612	3.44333	11	168619	0.0267856	508730	3.01703	168619	0.0538859	580612	3.44333	168619
478862	3.67514	8	130297	0.0261951	420785	3.22942	130297	0.0780786	478862	3.67514	130297
548117	4.26892	14	128397	0.0183476	500487	3.89796	128397	0.0686027	548117	4.26892	128397
419934	4.01328	10	104636	0.0326627	357593	3.41749	104636	0.050743	419934	4.01328	104636
462839	4.017	10	115220	0.0330822	393329	3.41372	115220	0.0604792	462839	4.017	115220
648516	2.70172	10	240038	0.0410345	530389	2.20961	240038	0.0559919	648516	2.70172	240038
501708	3.66568	18	136866	0.0298748	433041	3.16397	136866	0.0681489	501708	3.66568	136866
593708	4.59488	13	129211	0.0149865	551152	4.26553	129211	0.0599499	593708	4.59488	129211
640514	4.18093	13	153199	0.0364193	535613	3.49619	153199	0.0660942	640514	4.18093	153199
629903	4.04251	9	155820	0.0493599	495053	3.17709	155820	0.0652029	629903	4.04251	155820
485174	3.6569	11	132674	0.0307279	417040	3.14335	132674	0.0569486	485174	3.6569	132674
457032	4.01557	15	113815	0.0357825	383357	3.36825	113815	0.0418605	457032	4.01557	113815
517478	3.57263	13	144845	0.0333406	439212	3.03229	144845	0.055983	517478	3.57263	144845
712893	3.11314	14	228995	0.0370689	594274	2.59514	228995	0.0715984	712893	3.11314	228995
537912	3.7104	14	144974	0.0205996	485774	3.35077	144974	0.060539	537912	3.7104	144974
400884	3.75233	14	106836	0.0264188	351881	3.29365	106836	0.0661721	400884	3.75233	106836
548975	3.03547	12	180853	0.0284125	477217	2.6387	180853	0.0460253	548975	3.03547	180853
616982	2.46553	16	250243	0.0429254	500042	1.99823	250243	0.0675831	616982	2.46553	250243
444586	3.56115	11	124843	0.0283782	386538	3.09618	124843	0.0551435	444586	3.56115	124843
739790	4.29801	9	172124	0.0383276	612966	3.56119	172124	0.0628842	739790	4.29801	172124
519918	3.80876	8	136506	0.0314235	445399	3.26286	136506	0.0552409	519918	3.80876	136506
465052	3.97009	10	117139	0.0313215	398594	3.40275	117139	0.067175	465052	3.97009	117139
500402	3.39017	15	147604	0.0172034	459494	3.11302	147604	0.0585869	500402	3.39017	147604
670978	3.54193	9	189438	0.0205862	605982	3.19884	189438	0.0597474	670978	3.54193	189438
356248	4.05527	8	87848.2	0.0323025	303891	3.45928	87848.2	0.0639309	356248	4.05527	87848.2
554015	4.55786	19	121552	0.0296892	478620	3.93759	121552	0.063364	554015	4.55786	121552
411186	3.89308	14	105620	0.0420544	334647	3.16841	105620	0.0493889	411186	3.89308	105620
514173	3.76152	12	136693	0.0283406	447120	3.27099	136693	0.0608423	514173	3.76152	136693
678825	3.92832	17	172803	0.033991	574347	3.32371	172803	0.0693087	678825	3.92832	172803
538489	4.27353	12	126006	0.0483235	425305	3.37528	126006	0.0632331	538489	4.27353	126006
597891	5.04274	10	118565	0.0289055	518496	4.3731	118565	0.0684781	597891	5.04274	118565
666725	4.45298	13	149726	0.0213902	599775	4.00583	149726	0.059382	666725	4.45298	149726
610473	3.54689	10	172115	0.0244247	541086	3.14375	172115	0.0474199	610473	3.54689	172115
488027	3.8865	13	125570	0.0390928	402877	3.20839	125570	0.0532773	488027	3.8865	125570
434717	3.0175	11	144065	0.0308947	373366	2.59165	144065	0.0579019	434717	3.0175	144065
741423	3.67009	11	202018	0.0248467	655800	3.24625	202018	0.059418	741423	3.67009	202018
706311	3.16601	12	223092	0.0269133	618482	2.77232	223092	0.0604293	706311	3.16601	223092
608428	3.82508	8	159063	0.0299426	524982	3.30046	159063	0.0617695	608428	3.82508	159063
447181	3.4665	8	129001	0.0246918	395838	3.0685	129001	0.0619746	447181	3.4665	129001
642477	4.36014	14	147352	0.0377441	533834	3.62284	147352	0.0753861	642477	4.36014	147352
880378	3.76744	6	233681	0.0234896	783884	3.35451	233681	0.0656455	880378	3.76744	233681
610677	4.78258	13	127688	0.0165795	562477	4.4051	127688	0.0406691	610677	4.78258	127688
642050	4.1702	11	153961	0.0343378	542321	3.52245	153961	0.0627232	642050	4.1702	153961
530014	4.75191	6	111537	0.0337369	448991	4.02549	111537	0.0604156	530014	4.75191	111537
644198	4.04057	10	159432	0.0379538	534723	3.35392	159432	0.0628044	644198	4.04057	159432
483765	4.05484	18	119306	0.033129	411019	3.4451	119306	0.0602887	483765	4.05484	119306
698819	4.56975	14	152923	0.0229432	623889	4.07976	152923	0.0579872	698819	4.56975	152923
324127	2.47972	9	130711	0.0390535	267624	2.04745	130711	0.0429113	324127	2.47972	130711
678913	4.20169	10	161581	0.0311052	582504	3.60503	161581	0.079336	678913	4.20169	161581
522716	3.40065	14	153711	0.0457703	417911	2.71882	153711	0.0754869	522716	3.40065	153711
425752	3.78334	12	112533	0.0177194	389956	3.46525	112533	0.0691101	425752	3.78334	112533
691140	3.43797	11	201031	0.0194044	627818	3.12299	201031	0.0637279	691140	3.43797	201031
626969	4.22194	17	148503	0.0101136	596204	4.01477	148503	0.0745059	626969	4.22194	148503
621423	3.11116	11	199740	0.0228972	554916	2.77819	199740	0.0581822	621423	3.11116	199740
729764	3.15945	10	230978	0.028025	635571	2.75165	230978	0.0576631	729764	3.15945	230978
548395	4.49647	19	121961	0.0252278	484163	3.96981	121961	0.0602382	548395	4.49647	121961
534699	3.1223	15	171251	0.0288565	463805	2.70833	171251	0.080093	534699	3.1223	171251
468858	4.79563	10	97767.8	0.0364548	392003	4.00953	97767.8	0.0699031	468858	4.79563	97767.8
857516	3.2069	8	267398	0.0393566	707000	2.644	267398	0.064435	857516	3.2069	267398
591797	3.56184	10	166149	0.0217931	531322	3.19786	166149	0.0518005	591797	3.56184	166149
631053	4.14007	17	152426	0.0293003	546205	3.58342	152426	0.0714017	631053	4.14007	152426
347174	4.49164	12	77293.4	0.0233912	309270	4.00125	77293.4	0.0635778	347174	4.49164	77293.4
561073	3.78703	14	148157	0.0234001	499795	3.37343	148157	0.0469738	561073	3.78703	148157
709919	3.66889	11	193497	0.039138	585926	3.02809	193497	0.0587448	709919	3.66889	193497
561659	2.97224	15	188968	0.0200785	508516	2.69102	188968	0.059789	561659	2.97224	188968
542192	4.05821	14	133604	0.0234073	482959	3.61486	133604	0.0493324	542192	4.05821	133604
603710	3.56058	9	169554	0.0304314	519676	3.06496	169554	0.0676376	603710	3.56058	169554
700261	3.68882	13	189833	0.0157963	647480	3.41079	189833	0.0596873	700261	3.68882	189833
571863	3.4912	6	163801	0.0289507	495814	3.02692	163801	0.0585741	571863	3.4912	163801
697527	3.26295	13	213772	0.0494255	548029	2.56362	213772	0.0677875	697527	3.26295	213772
709068	3.83007	10	185132	0.0313652	607611	3.28205	185132	0.0455806	709068	3.83007	185132
223858	4.18446	11	53497.4	0.0181881	204565	3.82384	53497.4	0.0578807	223858	4.18446	53497.4
647427	4.29413	12	150770	0.0376388	538220	3.5698	150770	0.059656	647427	4.29413	150770
476359	2.53494	6	187917	0.0525972	368658	1.96181	187917	0.0463899	476359	2.53494	187917
586539	3.19042	10	183844	0.0481123	463722	2.52237	183844	0.0533409	586539	3.19042	183844
447655	3.84437	12	116444	0.0299859	386177	3.31641	116444	0.0571124	447655	3.84437	116444
419796	4.63234	16	90622.8	0.0342879	354676	3.91375	90622.8	0.0658024	419796	4.63234	90622.8
583354	3.36189	6	173520	0.0263826	512137	2.95146	173520	0.0600426	583354	3.36189	173520
687541	4.02196	18	170947	0.0384236	569411	3.33092	170947	0.0500829	687541	4.02196	170947
656798	3.72363	9	176387	0.0274028	573757	3.25284	176387	0.0463113	656798	3.72363	176387
690395	3.3849	12	203963	0.0150472	640718	3.14134	203963	0.0703872	690395	3.3849	203963
495000	3.32847	10	148717	0.029843	427317	2.87336	148717	0.0458553	495000	3.32847	148717
499092	3.55241	18	140494	0.0284445	433786	3.08758	140494	0.0700909	499092	3.55241	140494
560067	3.49087	12	160438	0.0364198	468340	2.91914	160438	0.0599535	560067	3.49087	160438
446854	4.58417	12	97477.6	0.0478719	353691	3.62844	97477.6	0.0537622	446854	4.58417	97477.6
652846	3.9156	8	166730	0.0360917	546789	3.2795	166730	0.0462474	652846	3.9156	166730
666375	4.01375	9	166023	0.0402934	546940	3.29436	166023	0.0701526	666375	4.01375	166023
548968	3.2914	10	166788	0.023212	489462	2.93463	166788	0.0514923	548968	3.2914	166788
401537	4.17495	4	96177.7	0.0285327	348847	3.62711	96177.7	0.0604782	401537	4.17495	96177.7
766045	4.60327	8	166413	0.00652283	741543	4.45604	166413	0.0751282	766045	4.60327	166413
533819	4.40341	11	121229	0.0393935	440042	3.62986	121229	0.0609097	533819	4.40341	121229
679038	4.07367	9	166690	0.029972	585824	3.51446	166690	0.0526474	679038	4.07367	166690
497405	3.02925	10	164201	0.025057	439511	2.67667	164201	0.0669801	497405	3.02925	164201
726649	4.46338	13	162803	0.0354679	610438	3.74956	162803	0.0535238	726649	4.46338	162803
612190	4.11019	12	148945	0.027679	534071	3.5857	148945	0.0586451	612190	4.11019	148945
566898	3.88892	13	145772	0.0185739	517061	3.54705	145772	0.0565661	566898	3.88892	145772
624352	4.00933	12	155725	0.029057	541043	3.47435	155725	0.0462088	624352	4.00933	155725
715014	4.30108	12	166240	0.02327	637328	3.83377	166240	0.0532963	715014	4.30108	166240
593147	4.64536	9	127686	0.0196636	538119	4.21439	127686	0.0610146	593147	4.64536	127686
797152	4.72526	8	168700	0.0124729	749246	4.44129	168700	0.058297	797152	4.72526	168700
683976	3.53242	9	193628	0.0276562	596762	3.082	193628	0.0655127	683976	3.53242	193628
607792	3.56618	14	170432	0.0376447	505256	2.96456	170432	0.0512789	607792	3.56618	170432
607021	3.6271	13	167357	0.0261672	533474	3.18764	167357	0.0537916	607021	3.6271	167357
524611	2.71244	11	193410	0.0254749	462607	2.39185	193410	0.0704413	524611	2.71244	193410
661966	3.66249	13	180742	0.0234826	589431	3.26117	180742	0.0555722	661966	3.66249	180742
658505	3.77472	12	174451	0.0255695	580408	3.32705	174451	0.0602424	658505	3.77472	174451
880779	3.46303	8	254338	0.0220768	789676	3.10484	254338	0.0661134	880779	3.46303	254338
480613	4.28752	13	112096	0.0296677	415251	3.70443	112096	0.0531059	480613	4.28752	112096
586969	3.16127	13	185675	0.0418782	478113	2.575	185675	0.0639738	586969	3.16127	185675
719229	4.39854	8	163516	0.06	537450	3.28684	163516	0.0487308	719229	4.39854	163516
557111	3.92896	10	141796	0.0186898	507846	3.58152	141796	0.0615019	557111	3.92896	141796
887671	3.01447	10	294470	0.0410221	726026	2.46554	294470	0.0670953	887671	3.01447	294470
594448	3.41088	8	174280	0.0279001	518036	2.97243	174280	0.0541065	594448	3.41088	174280
519410	4.58086	16	113387	0.0239159	461518	4.07029	113387	0.0367713	519410	4.58086	113387
603342	3.72886	10	161803	0.0413914	492599	3.04443	161803	0.0789298	603342	3.72886	161803
581612	4.42343	15	131484	0.00693569	561855	4.27318	131484	0.0668074	581612	4.42343	131484
558148	3.55344	9	157073	0.0325107	475638	3.02814	157073	0.070753	558148	3.55344	157073
538502	3.93092	18	136991	0.046787	428446	3.12754	136991	0.0729093	538502	3.93092	136991
571302	2.83011	11	201866	0.03974	470156	2.32905	201866	0.0504031	571302	2.83011	201866
661555	4.51186	9	146626	0.0394759	545122	3.71778	146626	0.0586346	661555	4.51186	146626
826336	3.6475	14	226548	0.0471746	656237	2.89668	226548	0.0561335	826336	3.6475	226548
726982	3.18076	15	228556	0.0182081	664264	2.90635	228556	0.0483976	726982	3.18076	228556
828562	3.47221	11	238627	0.019512	752251	3.15242	238627	0.0492899	828562	3.47221	238627
690946	3.56084	10	194040	0.0415386	563725	2.9052	194040	0.0422628	690946	3.56084	194040
390582	4.08756	17	95553.8	0.0293214	338032	3.53761	95553.8	0.0474641	390582	4.08756	95553.8
580410	4.15219	13	139784	0.0450689	465597	3.33083	139784	0.059515	580410	4.15219	139784
630931	3.74681	15	168392	0.0283669	548582	3.25778	168392	0.0744024	630931	3.74681	168392
428290	3.52839	14	121384	0.0288581	371502	3.06055	121384	0.0759025	428290	3.52839	121384
664776	4.69493	16	141594	0.0145917	618328	4.36689	141594	0.0501762	664776	4.69493	141594
683903	3.51902	7	194345	0.0411367	559056	2.87662	194345	0.0668305	683903	3.51902	194345
599505	3.96586	9	151167	0.0234998	533770	3.53101	151167	0.0724613	599505	3.96586	151167
566826	3.58419	16	158146	0.0358737	475243	3.00508	158146	0.0761957	566826	3.58419	158146
561123	3.27422	12	171376	0.0410303	458925	2.67788	171376	0.0570705	561123	3.27422	171376
565992	3.85126	15	146963	0.0278244	493419	3.35744	146963	0.0451635	565992	3.85126	146963
476391	3.5543	10	134032	0.0295962	411745	3.07198	134032	0.0521843	476391	3.5543	134032
460565	3.10221	15	148464	0.0251418	406791	2.74001	148464	0.051731	460565	3.10221	148464
508496	3.91607	10	129849	0.0425242	412912	3.17995	129849	0.0733812	508496	3.91607	129849
553784	3.46577	15	159787	0.0341033	468296	2.93076	159787	0.0485617	553784	3.46577	159787
543929	3.23101	18	168346	0.0248851	481024	2.85735	168346	0.075439	543929	3.23101	168346
419463	3.55601	12	117959	0.0233252	373788	3.1688	117959	0.0604255	419463	3.55601	117959
670949	2.76288	10	242844	0.0209528	604869	2.49077	242844	0.0670341	670949	2.76288	242844
698298	3.9117	11	178515	0.0306411	600487	3.36379	178515	0.0558772	698298	3.9117	178515
471806	3.84679	16	122649	0.0429123	382406	3.11788	122649	0.0474238	471806	3.84679	122649
600295	3.02085	16	198717	0.0309779	515368	2.59348	198717	0.0645917	600295	3.02085	198717
501169	3.48741	9	143708	0.0296672	433011	3.01313	143708	0.0558785	501169	3.48741	143708
752716	3.95681	8	190233	0.025396	664008	3.4905	190233	0.0451121	752716	3.95681	190233
447957	4.05777	11	110395	0.0268299	392413	3.55463	110395	0.0670713	447957	4.05777	110395
712461	2.30415	6	309208	0.0193886	647236	2.0932	309208	0.0687252	712461	2.30415	309208
445626	3.77659	13	117997	0.00970457	424618	3.59856	117997	0.0401226	445626	3.77659	117997
566791	3.81174	10	148696	0.0329967	481868	3.24063	148696	0.0594877	566791	3.81174	148696
535304	3.28601	18	162904	0.021642	480957	2.9524	162904	0.0531143	535304	3.28601	162904
756289	3.98062	14	189993	0.017306	694112	3.65336	189993	0.0484545	756289	3.98062	189993
509096	3.8083	5	133681	0.0412337	415967	3.11164	133681	0.0588044	509096	3.8083	133681
770591	2.56521	11	300401	0.0266434	675656	2.24918	300401	0.0697913	770591	2.56521	300401
616670	2.48724	11	247934	0.0215491	554315	2.23574	247934	0.043406	616670	2.48724	247934
427958	2.38538	19	179409	0.0225889	382733	2.1333	179409	0.0490795	427958	2.38538	179409
906160	3.56971	7	253847	0.0327203	771421	3.03892	253847	0.053798	906160	3.56971	253847
564518	4.38416	7	128763	0.06	421841	3.2761	128763	0.0683334	564518	4.38416	128763
715973	3.04396	12	235211	0.0191424	651212	2.76863	235211	0.0654716	715973	3.04396	235211
703098	3.17723	9	221293	0.0255	619923	2.80137	221293	0.0534818	703098	3.17723	221293
352924	3.65414	21	96581.9	0.011691	332998	3.44783	96581.9	0.0631819	352924	3.65414	96581.9
723443	3.8147	16	189646	0.0294262	625790	3.29978	189646	0.0602279	723443	3.8147	189646
581847	4.12882	15	140923	0.0333927	493722	3.50348	140923	0.070624	581847	4.12882	140923
365196	3.41572	15	106916	0.0296927	315492	2.95083	106916	0.0615466	365196	3.41572	106916
508012	3.48029	12	145968	0.025039	448923	3.07549	145968	0.0489769	508012	3.48029	145968
629603	2.31434	14	272045	0.030034	543012	1.99604	272045	0.0507866	629603	2.31434	272045
715112	2.94659	12	242691	0.0123988	672382	2.77052	242691	0.0664924	715112	2.94659	242691
723739	3.18887	21	226958	0.0143944	673826	2.96895	226958	0.0683243	723739	3.18887	226958
631515	2.94835	12	214193	0.0316117	540508	2.52346	214193	0.072176	631515	2.94835	214193
721679	3.85015	14	187442	0.0341033	610274	3.2558	187442	0.0635989	721679	3.85015	187442
496163	4.20305	13	118048	0.0352961	417159	3.5338	118048	0.0726096	496163	4.20305	118048
513279	4.64058	17	110607	0.0376254	426728	3.85806	110607	0.068956	513279	4.64058	110607
610457	4.54266	11	134383	0.0284182	530648	3.94877	134383	0.0666542	610457	4.54266	134383
601334	4.25049	16	141474	0.0259133	529130	3.74012	141474	0.060374	601334	4.25049	141474
625851	3.9656	10	157820	0.0455069	500998	3.17449	157820	0.0453992	625851	3.9656	157820
721441	4.05068	14	178104	0.0291447	624912	3.50869	178104	0.0656991	721441	4.05068	178104
391582	4.10218	12	95457.2	0.0363387	327578	3.43167	95457.2	0.0803297	391582	4.10218	95457.2
457887	3.63572	24	125941	0.0236837	407314	3.23416	125941	0.0340535	457887	3.63572	125941
647028	3.10151	8	208617	0.0539042	497642	2.38543	208617	0.0479932	647028	3.10151	208617
561411	3.72382	12	150762	0.0434738	453809	3.0101	150762	0.0493133	561411	3.72382	150762
610396	3.65067	18	167201	0.0285179	530338	3.17186	167201	0.0760246	610396	3.65067	167201
745712	3.66373	8	203539	0.011044	705864	3.46796	203539	0.064915	745712	3.66373	203539
588524	2.90147	20	202836	0.0334514	499245	2.46132	202836	0.0601082	588524	2.90147	202836
534469	3.88632	14	137526	0.0394602	440437	3.20257	137526	0.059255	534469	3.88632	137526
482795	4.1241	10	117067	0.0366922	403193	3.44414	117067	0.0645244	482795	4.1241	117067
677010	3.40124	9	199048	0.0477939	536063	2.69314	199048	0.0600218	677010	3.40124	199048
629756	3.8549	10	163365	0.0458918	503197	3.08021	163365	0.0707514	629756	3.8549	163365
736527	4.41321	11	166892	0.024421	652824	3.91167	166892	0.0605352	736527	4.41321	166892
693705	4.23253	6	163898	0.0449369	556832	3.39743	163898	0.0548289	693705	4.23253	163898
396730	4.28375	12	92612.7	0.0260437	348872	3.767	92612.7	0.0802456	396730	4.28375	92612.7
420814	3.48583	10	120721	0.0297952	363359	3.0099	120721	0.0789291	420814	3.48583	120721
792954	2.68511	15	295315	0.0184551	723666	2.45049	295315	0.0659811	792954	2.68511	295315
616256	4.27128	9	144279	0.00976693	587023	4.06867	144279	0.0512703	616256	4.27128	144279
389210	3.04685	19	127742	0.0443225	313337	2.45289	127742	0.0951846	389210	3.04685	127742
602265	3.76304	14	160048	0.0346418	507970	3.17387	160048	0.0504613	602265	3.76304	160048
499231	4.00804	12	124557	0.0181875	456208	3.66263	124557	0.0381937	499231	4.00804	124557
643558	4.17437	17	154169	0.0345423	543058	3.52249	154169	0.0577415	643558	4.17437	154169
558770	3.38815	16	164919	0.0461718	445880	2.70363	164919	0.0652749	558770	3.38815	164919
729408	2.95388	13	246932	0.0317847	623771	2.52608	246932	0.0630131	729408	2.95388	246932
628133	4.19351	17	149787	0.045379	503133	3.35899	149787	0.0628513	628133	4.19351	149787
702936	3.56283	11	197297	0.0285057	610777	3.09572	197297	0.0606659	702936	3.56283	197297
663773	5.51297	21	120402	0.0237977	590132	4.90134	120402	0.0651393	663773	5.51297	120402
852376	3.40749	12	250148	0.0382596	706483	2.82426	250148	0.0696515	852376	3.40749	250148
689555	3.33657	13	206666	0.0337183	584195	2.82676	206666	0.0696467	689555	3.33657	206666
481470	3.77435	11	127564	0.0386056	398397	3.12312	127564	0.0570092	481470	3.77435	127564
711016	3.92293	18	181246	0.0226336	635739	3.5076	181246	0.0624078	711016	3.92293	181246
416437	3.59266	12	115913	0.0229282	371812	3.20767	115913	0.0610433	416437	3.59266	115913
513805	3.99741	19	128534	0.0260659	451775	3.51481	128534	0.043589	513805	3.99741	128534
717081	3.59009	14	199739	0.01976	650247	3.25548	199739	0.0469621	717081	3.59009	199739
580235	3.95175	12	146830	0.0314755	496946	3.38451	146830	0.0640994	580235	3.95175	146830
580957	3.48123	9	166882	0.025604	511971	3.06785	166882	0.0663926	580957	3.48123	166882
637169	2.80808	15	226905	0.0291577	551881	2.43221	226905	0.0440919	637169	2.80808	226905
544425	3.7299	6	145962	0.0351766	458000	3.1378	145962	0.0815296	544425	3.7299	145962
388821	2.64173	7	147184	0.0215741	349462	2.37432	147184	0.0592536	388821	2.64173	147184
380229	3.40188	13	111771	0.0469258	302320	2.70482	111771	0.0634389	380229	3.40188	111771
525418	3.85178	15	136409	0.0186989	478934	3.51101	136409	0.070113	525418	3.85178	136409
496623	3.40512	12	145846	0.00879687	475345	3.25922	145846	0.0649727	496623	3.40512	145846
493615	3.92377	17	125801	0.0283825	429156	3.41138	125801	0.0623112	493615	3.92377	125801
532344	3.26487	14	163052	0.0343637	449600	2.7574	163052	0.0729178	532344	3.26487	163052
432905	3.58198	14	120856	0.0307521	372068	3.07859	120856	0.0587133	432905	3.58198	120856
701538	3.55885	13	197125	0.0342605	592791	3.00719	197125	0.0416007	701538	3.55885	197125
483949	3.44798	17	140357	0.0386869	400291	2.85195	140357	0.0425802	483949	3.44798	140357
691194	4.05391	9	170501	0.0418889	562980	3.30192	170501	0.049863	691194	4.05391	170501
674108	2.95742	14	227938	0.0316109	576965	2.53124	227938	0.0465554	674108	2.95742	227938
602569	3.02895	9	198937	0.0335484	510919	2.56825	198937	0.0506203	602569	3.02895	198937
491648	3.39061	8	145003	0.033757	416449	2.87201	145003	0.0557769	491648	3.39061	145003
766196	3.86072	15	198459	0.0150278	711132	3.58326	198459	0.0618603	766196	3.86072	198459
444897	3.53097	19	125998	0.0517589	345683	2.74355	125998	0.0584158	444897	3.53097	125998
643212	2.75335	11	233611	0.0333885	545804	2.33638	233611	0.0684359	643212	2.75335	233611
765608	3.97097	10	192801	0.0299717	660511	3.42587	192801	0.0736293	765608	3.97097	192801
702618	4.04315	13	173780	0.0101784	667927	3.84352	173780	0.0635981	702618	4.04315	173780
680068	2.87808	10	236293	0.0252218	600431	2.54105	236293	0.0627786	680068	2.87808	236293
435505	3.43431	14	126810	0.0402055	357600	2.81996	126810	0.0701879	435505	3.43431	126810
825185	3.28992	11	250822	0.0379536	684954	2.73084	250822	0.0818514	825185	3.28992	250822
549686	3.6326	14	151320	0.0326611	468086	3.09334	151320	0.0605977	549686	3.6326	151320
636637	2.92626	13	217560	0.0308767	546837	2.5135	217560	0.0617287	636637	2.92626	217560
713569	3.11114	12	229359	0.0303	614636	2.6798	229359	0.0548408	713569	3.11114	229359
640214	4.06794	11	157380	0.0394746	527540	3.35201	157380	0.0580051	640214	4.06794	157380
575252	4.2088	12	136678	0.0225132	514652	3.76542	136678	0.0603407	575252	4.2088	136678
580030	3.1302	9	185301	0.0299123	500552	2.70129	185301	0.0600739	580030	3.1302	185301
524070	4.27826	8	122496	0.0397805	431202	3.52013	122496	0.062203	524070	4.27826	122496
634527	2.82497	8	224613	0.01562	587210	2.61432	224613	0.0526533	634527	2.82497	224613
485723	3.55044	11	136806	0.0288831	421268	3.0793	136806	0.0570458	485723	3.55044	136806
524939	4.48508	14	117041	0.0346687	442692	3.78237	117041	0.0627198	524939	4.48508	117041
583266	2.69928	9	216082	0.0385391	482784	2.23426	216082	0.0577504	583266	2.69928	216082
533497	3.92381	10	135964	0.0338543	451684	3.32209	135964	0.0638499	533497	3.92381	135964
773108	3.47879	13	222235	0.0339223	654336	2.94435	222235	0.0666198	773108	3.47879	222235
367516	3.57989	10	102661	0.0534912	283218	2.75877	102661	0.0665432	367516	3.57989	102661
715433	3.70749	9	192970	0.0216632	642732	3.33074	192970	0.0488796	715433	3.70749	192970
465894	4.03418	12	115487	0.0350346	392205	3.39611	115487	0.0696343	465894	4.03418	115487
478737	3.72935	12	128370	0.0221558	429054	3.34231	128370	0.0688562	478737	3.72935	128370
494162	4.68706	10	105431	0.0267258	433108	4.10798	105431	0.0505709	494162	4.68706	105431
725383	3.09232	8	234576	0.0420298	590428	2.51701	234576	0.0594177	725383	3.09232	234576
518207	4.22455	12	122666	0.0312993	444201	3.62123	122666	0.0691919	518207	4.22455	122666
615351	4.12686	15	149109	0.0414698	502215	3.36811	149109	0.0753462	615351	4.12686	149109
623589	3.46691	14	179869	0.0422227	507102	2.81929	179869	0.0727919	623589	3.46691	179869
643985	3.59248	11	179259	0.0554402	491708	2.743	179259	0.0646104	643985	3.59248	179259
520095	2.81186	16	184965	0.0143437	484347	2.61859	184965	0.0616346	520095	2.81186	184965
676533	4.11092	13	164570	0.046886	538012	3.26921	164570	0.0449982	676533	4.11092	164570
657028	3.07341	11	213778	0.0352791	552455	2.58424	213778	0.0532785	657028	3.07341	213778
603798	2.60265	8	231994	0.0210983	543944	2.34465	231994	0.0698343	603798	2.60265	231994
723289	3.16552	15	228490	0.0327567	615632	2.69435	228490	0.0753135	723289	3.16552	228490
316041	4.17532	9	75692.7	0.0438352	255026	3.36922	75692.7	0.057766	316041	4.17532	75692.7
677135	4.13611	9	163713	0.0145855	629843	3.84724	163713	0.0697512	677135	4.13611	163713
667245	3.71383	11	179665	0.0349283	561997	3.12803	179665	0.065502	667245	3.71383	179665
548918	3.87045	8	141823	0.0245977	486117	3.42763	141823	0.0646305	548918	3.87045	141823
479546	4.0531	9	118316	0.0305725	412513	3.48654	118316	0.0450661	479546	4.0531	118316
474743	4.19687	16	113118	0.0393008	391518	3.46114	113118	0.0600618	474743	4.19687	113118
386701	4.56945	16	84627.6	0.0173901	354763	4.19204	84627.6	0.0665223	386701	4.56945	84627.6
555589	2.8994	16	191622	0.0307107	477606	2.49243	191622	0.047148	555589	2.8994	191622
577138	2.79048	11	206824	0.0314295	494404	2.39046	206824	0.0700288	577138	2.79048	206824
567950	3.89369	14	145864	0.058472	427477	2.93065	145864	0.0556248	567950	3.89369	145864
678903	3.43776	10	197484	0.0299829	585676	2.96569	197484	0.0709543	678903	3.43776	197484
284993	4.41896	11	64493.3	0.0195683	258674	4.01087	64493.3	0.0519628	284993	4.41896	64493.3
407989	3.21171	12	127032	0.0170011	375009	2.95209	127032	0.0581338	407989	3.21171	127032
528002	4.07194	13	129668	0.0395402	434940	3.35425	129668	0.060334	528002	4.07194	129668
673439	3.71957	9	181053	0.0233801	599948	3.31366	181053	0.0725574	673439	3.71957	181053
572467	3.84941	13	148716	0.0312642	490796	3.30023	148716	0.0686401	572467	3.84941	148716
596387	3.7472	7	159155	0.0411223	487550	3.06336	159155	0.0506214	596387	3.7472	159155
523241	3.56884	13	146614	0.0185999	477182	3.25468	146614	0.0528079	523241	3.56884	146614
682959	4.65372	10	146756	0.0375617	567969	3.87017	146756	0.0533773	682959	4.65372	146756
477510	3.47754	15	137313	0.0290472	413815	3.01367	137313	0.061478	477510	3.47754	137313
644441	4.21271	9	152975	0.0327132	548637	3.58644	152975	0.0709422	644441	4.21271	152975
686552	4.34306	15	158080	0.0318334	586983	3.7132	158080	0.061897	686552	4.34306	158080
572826	3.84072	17	149146	0.0437394	462448	3.10065	149146	0.0534513	572826	3.84072	149146
485555	4.16353	8	116621	0.0386304	401729	3.44474	116621	0.0661782	485555	4.16353	116621
841671	3.02087	22	278619	0.0270907	736374	2.64295	278619	0.059157	841671	3.02087	278619
726874	3.80994	13	190783	0.0299767	627079	3.28686	190783	0.0660333	726874	3.80994	190783
631639	2.93234	16	215404	0.0387023	522412	2.42527	215404	0.0451802	631639	2.93234	215404
720265	3.82893	11	188112	0.0183954	657522	3.49538	188112	0.0500724	720265	3.82893	188112
339281	3.52522	9	96243.9	0.0190861	308677	3.20724	96243.9	0.0559289	339281	3.52522	96243.9
376007	2.76702	11	135889	0.039678	309529	2.27781	135889	0.0709396	376007	2.76702	135889
528411	3.87011	11	136537	0.0406997	432857	3.17027	136537	0.0464752	528411	3.87011	136537
472598	3.66283	5	129026	0.0490489	371975	2.88295	129026	0.0655071	472598	3.66283	129026
607436	4.7489	9	127911	0.0369592	506632	3.96081	127911	0.0517033	607436	4.7489	127911
452234	2.89404	8	156264	0.0213544	406893	2.60389	156264	0.0543168	452234	2.89404	156264
670148	3.51652	12	190571	0.0245516	593610	3.1149	190571	0.0556212	670148	3.51652	190571
559695	3.23229	19	173157	0.0399533	460132	2.6573	173157	0.066911	559695	3.23229	173157
714207	3.78589	14	188650	0.018735	650906	3.45034	188650	0.0588025	714207	3.78589	188650
834378	4.04148	14	206453	0.0117324	787108	3.81252	206453	0.0479371	834378	4.04148	206453
784390	3.79892	10	206477	0.0321488	669608	3.24301	206477	0.0665438	784390	3.79892	206477
547141	4.09131	13	133732	0.0173242	502114	3.75462	133732	0.0643316	547141	4.09131	133732
553798	3.99571	7	138598	0.0248631	489804	3.53399	138598	0.0362972	553798	3.99571	138598
736278	3.09172	12	238145	0.0264122	646298	2.71389	238145	0.0727385	736278	3.09172	238145
495929	4.35612	7	113846	0.0436382	400562	3.51844	113846	0.0521466	495929	4.35612	113846
767395	3.13605	7	244701	0.0401641	630245	2.57557	244701	0.0421766	767395	3.13605	244701
552519	3.84448	13	143718	0.0360144	462933	3.22113	143718	0.0598325	552519	3.84448	143718
331924	3.56828	14	93020.6	0.0291908	287448	3.09015	93020.6	0.0599573	331924	3.56828	93020.6
530756	4.06912	7	130435	0.033051	451114	3.45853	130435	0.0537409	530756	4.06912	130435
629208	4.70027	8	133866	0.0304155	541667	4.04633	133866	0.069357	629208	4.70027	133866
565215	3.49933	17	161521	0.0215723	508005	3.14514	161521	0.0604725	565215	3.49933	161521
614282	4.10347	14	149698	0.027774	535648	3.57819	149698	0.0547787	614282	4.10347	149698
622670	4.34967	11	143153	0.0158972	575452	4.01983	143153	0.0534492	622670	4.34967	143153
484221	3.70989	11	130522	0.0276839	422421	3.23641	130522	0.0513454	484221	3.70989	130522
591413	4.58534	15	128979	0.0406268	484636	3.75748	128979	0.0547276	591413	4.58534	128979
553611	3.49741	14	158292	0.020603	499943	3.15836	158292	0.0466758	553611	3.49741	158292
544688	2.68654	16	202747	0.0323309	464572	2.29139	202747	0.0674135	544688	2.68654	202747
571421	3.80929	11	150007	0.0238813	507818	3.38529	150007	0.0707275	571421	3.80929	150007
613503	3.77364	14	162576	0.0287693	532386	3.27469	162576	0.057254	613503	3.77364	162576
753719	3.37974	13	223011	0.0292166	652643	2.9265	223011	0.0630447	753719	3.37974	223011
431003	3.89798	13	110571	0.0198353	390688	3.53337	110571	0.0548986	431003	3.89798	110571
543410	3.61379	12	150371	0.0238485	483002	3.21207	150371	0.0620625	543410	3.61379	150371
507367	3.36842	7	150624	0.0455721	406025	2.69561	150624	0.0581313	507367	3.36842	150624
538370	4.02664	16	133702	0.0353761	452470	3.38417	133702	0.0600186	538370	4.02664	133702
542199	3.69371	14	146790	0.0253113	478498	3.25975	146790	0.0746895	542199	3.69371	146790
606662	3.9416	14	153912	0.0464134	483537	3.14164	153912	0.049583	606662	3.9416	153912
620081	3.08338	15	201104	0.0329088	527398	2.62251	201104	0.0492695	620081	3.08338	201104
811950	2.7328	9	297113	0.0292766	702861	2.36563	297113	0.0612659	811950	2.7328	297113
565400	4.42622	14	127739	0.0421137	460024	3.60129	127739	0.0662878	565400	4.42622	127739
410506	3.8669	7	106159	0.0365138	343119	3.23212	106159	0.0643564	410506	3.8669	106159
532900	2.67552	14	199176	0.011168	504114	2.531	199176	0.0380578	532900	2.67552	199176
426104	4.59467	20	92738.7	0.0117579	401914	4.33383	92738.7	0.0620495	426104	4.59467	92738.7
580601	2.94383	10	197226	0.0232077	517677	2.62479	197226	0.0528196	580601	2.94383	197226
608265	4.11641	14	147766	0.0239833	540292	3.6564	147766	0.0632908	608265	4.11641	147766
525014	3.25751	9	161170	0.0374935	436761	2.70993	161170	0.0422387	525014	3.25751	161170
512566	3.29575	8	155524	0.0257293	451426	2.90262	155524	0.0727174	512566	3.29575	155524
433658	3.25361	11	133285	0.04253	352131	2.64194	133285	0.0749073	433658	3.25361	133285
479970	3.31553	7	144764	0.0293884	415258	2.86851	144764	0.0679242	479970	3.31553	144764
604273	4.16845	15	144964	0.0295157	522479	3.6042	144964	0.0443935	604273	4.16845	144964
604334	3.6909	13	163736	0.0377298	502176	3.06698	163736	0.0703802	604334	3.6909	163736
591067	3.52064	12	167886	0.0303078	509098	3.0324	167886	0.0636813	591067	3.52064	167886
456847	4.42564	11	103227	0.0195886	414615	4.01653	103227	0.0522289	456847	4.42564	103227
645773	3.99494	11	161648	0.0316133	552708	3.41921	161648	0.0561141	645773	3.99494	161648
781201	3.41778	14	228570	0.0264716	685532	2.99922	228570	0.0579863	781201	3.41778	228570
459018	4.23347	11	108426	0.0238723	407944	3.76242	108426	0.0590631	459018	4.23347	108426
442079	3.89583	7	113475	0.0244833	391720	3.45204	113475	0.0525756	442079	3.89583	113475
584887	3.89204	13	150278	0.0317896	500169	3.32829	150278	0.0826679	584887	3.89204	150278
863852	4.72028	8	183009	0.0208756	779068	4.257	183009	0.0532598	863852	4.72028	183009
472715	3.98927	11	118497	0.0398053	388901	3.28196	118497	0.0561583	472715	3.98927	118497
537425	3.11726	11	172403	0.0263499	471890	2.73714	172403	0.0629051	537425	3.11726	172403
562619	4.6545	14	120876	0.0191509	511708	4.23332	120876	0.0580854	562619	4.6545	120876
575924	2.58879	15	222469	0.00458659	562896	2.53023	222469	0.0560529	575924	2.58879	222469
782515	2.29236	17	341358	0.0370276	652440	1.91131	341358	0.0795987	782515	2.29236	341358
620878	2.85992	12	217096	0.0361784	519797	2.39432	217096	0.0615367	620878	2.85992	217096
534666	3.7747	14	141645	0.0303193	460493	3.25105	141645	0.0621646	534666	3.7747	141645
501509	3.4378	17	145881	0.0325908	427206	2.92846	145881	0.0626847	501509	3.4378	145881
552278	3.16734	13	174367	0.0246332	489008	2.80448	174367	0.0558565	552278	3.16734	174367
795325	3.76312	7	211347	0.0348018	670284	3.17148	211347	0.0513817	795325	3.76312	211347
732993	3.64155	10	201286	0.0185968	668480	3.32104	201286	0.055137	732993	3.64155	201286
695753	2.99065	15	232643	0.0144415	647620	2.78375	232643	0.0544791	695753	2.99065	232643
521523	3.4418	9	151526	0.027005	456469	3.01247	151526	0.0676185	521523	3.4418	151526
854010	3.11974	8	273744	0.00467816	834311	3.04778	273744	0.0746077	854010	3.11974	273744
443664	3.45557	13	128391	0.0270284	388277	3.02418	128391	0.0405048	443664	3.45557	128391
439042	3.58745	14	122383	0.0292881	380033	3.10528	122383	0.0619254	439042	3.58745	122383
677790	4.01543	18	168796	0.034913	570921	3.38231	168796	0.0589881	677790	4.01543	168796
764678	4.04197	10	189185	0.0317182	654144	3.4577	189185	0.0694741	764678	4.04197	189185
647090	3.36124	14	192515	0.0344622	546250	2.83744	192515	0.0586089	647090	3.36124	192515
584210	3.35451	15	174157	0.0313547	500643	2.87467	174157	0.0776544	584210	3.35451	174157
537527	4.34645	10	123670	0.0328705	457268	3.69747	123670	0.0509525	537527	4.34645	123670
590983	2.98433	12	198029	0.0456455	472773	2.3874	198029	0.0682525	590983	2.98433	198029
738618	3.66857	10	201337	0.0287046	641160	3.18452	201337	0.0678432	738618	3.66857	201337
463264	3.33074	9	139087	0.0156699	428614	3.08161	139087	0.0741925	463264	3.33074	139087
608271	3.29646	14	184523	0.029058	527106	2.85659	184523	0.0697927	608271	3.29646	184523
766060	3.50363	17	218648	0.0320259	654350	2.99272	218648	0.053374	766060	3.50363	218648
449789	3.55561	18	126501	0.0290883	389714	3.08071	126501	0.0823951	449789	3.55561	126501
747034	3.05996	8	244131	0.0376423	621015	2.54377	244131	0.0595785	747034	3.05996	244131
485393	2.77906	8	174661	0.0387548	401355	2.29791	174661	0.0544761	485393	2.77906	174661
648643	3.51259	6	184662	0.0273497	566780	3.06928	184662	0.0706641	648643	3.51259	184662
835972	3.98819	6	209612	0.0192724	759872	3.62514	209612	0.0589073	835972	3.98819	209612
458785	3.74064	12	122649	0.0318444	392228	3.19797	122649	0.0649237	458785	3.74064	122649
675485	4.15949	10	162396	0.0520515	524120	3.22741	162396	0.05312	675485	4.15949	162396
481524	3.86087	10	124719	0.0262659	422978	3.39146	124719	0.050528	481524	3.86087	124719
625290	3.31588	8	188574	0.0455882	500355	2.65336	188574	0.0692156	625290	3.31588	188574
600668	4.21672	10	142449	0.0490969	472668	3.31815	142449	0.0616393	600668	4.21672	142449
719336	3.23279	18	222512	0.02532	634797	2.85286	222512	0.0580552	719336	3.23279	222512
558288	3.41212	11	163619	0.0229973	498294	3.04546	163619	0.0497225	558288	3.41212	163619
447811	3.76618	10	118903	0.0443242	360511	3.03196	118903	0.0681859	447811	3.76618	118903
604726	4.28886	11	140999	0.0320445	516496	3.66311	140999	0.0523886	604726	4.28886	140999
693256	3.56731	16	194336	0.0295162	599415	3.08443	194336	0.0527789	693256	3.56731	194336
514331	4.53227	12	113482	0.031676	440074	3.87793	113482	0.0585955	514331	4.53227	113482
827133	4.1655	17	198567	0.0357751	693822	3.49414	198567	0.0493886	827133	4.1655	198567
615675	4.11118	12	149756	0.0265979	539945	3.60549	149756	0.0610631	615675	4.11118	149756
651391	3.79515	10	171638	0.0347188	549199	3.19976	171638	0.0647109	651391	3.79515	171638
591632	3.57956	14	165280	0.042611	480220	2.90548	165280	0.0396232	591632	3.57956	165280
496892	3.12906	10	158799	0.0380778	412205	2.59576	158799	0.0631018	496892	3.12906	158799
635416	3.76942	11	168571	0.0276163	554502	3.28942	168571	0.0427586	635416	3.76942	168571
719770	3.90764	10	184196	0.0273576	628906	3.41433	184196	0.0693493	719770	3.90764	184196
832211	2.98776	16	278540	0.0299701	717976	2.57764	278540	0.0553782	832211	2.98776	278540
808873	3.85195	11	209990	0.0250221	714848	3.4042	209990	0.042174	808873	3.85195	209990
755399	2.63876	11	286271	0.0373769	628772	2.19643	286271	0.0626039	755399	2.63876	286271
575619	3.00695	15	191430	0.029028	498884	2.60609	191430	0.0658113	575619	3.00695	191430
534755	2.981	7	179388	0.029204	463071	2.5814	179388	0.0587557	534755	2.981	179388
569397	3.27071	11	174090	0.0425538	462299	2.65552	174090	0.0659849	569397	3.27071	174090
425283	3.80293	12	111831	0.0208587	383575	3.42997	111831	0.0541801	425283	3.80293	111831
746587	5.09537	13	146523	0.0428846	605201	4.13042	146523	0.0515701	746587	5.09537	146523
675017	3.731	13	180921	0.0177766	618091	3.41635	180921	0.0551407	675017	3.731	180921
570546	3.49123	9	163423	0.045139	457531	2.79968	163423	0.060765	570546	3.49123	163423
619734	4.62777	15	133916	0.0347927	522322	3.90036	133916	0.0409078	619734	4.62777	133916
683641	3.36044	10	203438	0.0548108	523546	2.5735	203438	0.0448037	683641	3.36044	203438
717438	4.66148	15	153908	0.0398306	590162	3.83452	153908	0.0674873	717438	4.66148	153908
687080	3.97106	13	173022	0.0382813	569419	3.29102	173022	0.0501531	687080	3.97106	173022
706997	4.12844	13	171250	0.00663794	683992	3.99411	171250	0.0678715	706997	4.12844	171250
470033	3.11175	13	151051	0.0305727	404329	2.67677	151051	0.0676364	470033	3.11175	151051
582270	4.53568	10	128375	0.0254455	513525	4.00018	128375	0.0545587	582270	4.53568	128375
369655	3.8324	8	96455.5	0.0254962	325932	3.37909	96455.5	0.0463314	369655	3.8324	96455.5
544966	3.65437	16	149127	0.0291926	471939	3.16468	149127	0.0474616	544966	3.65437	149127
607014	3.48148	16	174355	0.036331	507816	2.91254	174355	0.0479514	607014	3.48148	174355
331238	4.11001	11	80593.1	0.0464179	264007	3.2758	80593.1	0.0612208	331238	4.11001	80593.1
378319	3.62824	14	104271	0.0379665	314008	3.01147	104271	0.041722	378319	3.62824	104271
507064	3.93682	10	128800	0.026537	444825	3.4536	128800	0.0421065	507064	3.93682	128800
619442	3.82072	17	162127	0.0266002	543243	3.35073	162127	0.0690924	619442	3.82072	162127
477925	2.88688	18	165551	0.0250476	422318	2.55099	165551	0.067636	477925	2.88688	165551
577295	4.32251	14	133555	0.0210039	520308	3.89582	133555	0.04797	577295	4.32251	133555
554991	4.77538	11	116219	0.0311888	475987	4.0956	116219	0.0625273	554991	4.77538	116219
693570	4.51043	11	153770	0.0348028	584524	3.80128	153770	0.0523639	693570	4.51043	153770
445842	3.17859	7	140264	0.0395873	367178	2.61776	140264	0.0561736	445842	3.17859	140264
532759	3.60495	14	147786	0.0301971	459123	3.10669	147786	0.0665266	532759	3.60495	147786
412563	3.69878	9	111540	0.0200114	373650	3.34991	111540	0.051198	412563	3.69878	111540
555255	4.49157	11	123622	0.0335968	470692	3.80753	123622	0.0520963	555255	4.49157	123622
555592	3.03257	14	183208	0.0162877	512475	2.79723	183208	0.0600946	555592	3.03257	183208
467020	4.03711	14	115682	0.0409291	382146	3.30343	115682	0.065813	467020	4.03711	115682
596619	3.62384	12	164637	0.0462404	475927	2.89076	164637	0.0566183	596619	3.62384	164637
630183	4.27467	11	147423	0.0378449	523364	3.55009	147423	0.0547754	630183	4.27467	147423
706221	3.63583	13	194240	0.0251692	623682	3.21089	194240	0.0525883	706221	3.63583	194240
530041	4.35901	15	121597	0.0249473	468600	3.85372	121597	0.0759514	530041	4.35901	121597
619448	3.67088	10	168747	0.0265395	543409	3.22026	168747	0.0535186	619448	3.67088	168747
676692	3.5612	14	190018	0.0359231	567223	2.9851	190018	0.0708529	676692	3.5612	190018
775093	3.83641	19	202036	0.0322651	661299	3.27317	202036	0.0392616	775093	3.83641	202036
657710	3.2745	15	200858	0.0279171	573118	2.85334	200858	0.0745986	657710	3.2745	200858
834344	3.82513	8	218121	0.0360834	698830	3.20386	218121	0.0635893	834344	3.82513	218121
806580	3.51854	12	229237	0.0424977	655046	2.8575	229237	0.0401889	806580	3.51854	229237
588114	4.71182	11	124817	0.025372	518865	4.15701	124817	0.0706935	588114	4.71182	124817
415100	2.83152	7	146599	0.0217824	372701	2.54231	146599	0.057771	415100	2.83152	146599
736044	2.77362	13	265373	0.0187142	670876	2.52805	265373	0.0690813	736044	2.77362	265373
666568	3.37558	10	197468	0.0440839	537239	2.72064	197468	0.0670476	666568	3.37558	197468
453874	4.12102	14	110136	0.0194579	412182	3.74247	110136	0.0686027	453874	4.12102	110136
691446	3.74675	14	184546	0.0126368	649366	3.51873	184546	0.0516937	691446	3.74675	184546
674006	3.70441	7	181947	0.033073	572808	3.14821	181947	0.0422839	674006	3.70441	181947
557792	3.5506	11	157098	0.0491883	438738	2.79277	157098	0.0691638	557792	3.5506	157098
460782	3.4815	8	132352	0.0397918	379109	2.8644	132352	0.0509562	460782	3.4815	132352
303345	2.61652	12	115934	0.0361401	254006	2.19095	115934	0.049707	303345	2.61652	115934
664676	4.22863	7	157185	0.0337999	562895	3.58111	157185	0.0623166	664676	4.22863	157185
510487	3.61107	10	141367	0.0248075	451620	3.19466	141367	0.068557	510487	3.61107	141367
635823	3.35473	8	189530	0.0544517	487756	2.5735	189530	0.0586185	635823	3.35473	189530
573688	3.63458	9	157842	0.0249367	507213	3.21343	157842	0.0554518	573688	3.63458	157842
523063	2.56447	11	203965	0.0204976	472600	2.31706	203965	0.0824293	523063	2.56447	203965
449424	3.29897	9	136232	0.0274629	392488	2.88103	136232	0.0576368	449424	3.29897	136232
649194	3.31824	10	195644	0.029796	560555	2.86518	195644	0.0565869	649194	3.31824	195644
445384	3.49489	13	127439	0.0275187	388853	3.0513	127439	0.0655243	445384	3.49489	127439
625044	2.91515	10	214412	0.0443607	503104	2.34643	214412	0.0669953	625044	2.91515	214412
639518	2.78334	12	229766	0.0251475	564834	2.4583	229766	0.0550004	639518	2.78334	229766
390134	3.58634	16	108783	0.0254613	344047	3.16268	108783	0.0451032	390134	3.58634	108783
679353	3.23931	15	209721	0.0121135	639660	3.05004	209721	0.0668438	679353	3.23931	209721
614608	3.56229	13	172531	0.0103277	583830	3.38391	172531	0.0584168	614608	3.56229	172531
605629	3.69176	17	164049	0.0287332	525645	3.2042	164049	0.0490365	605629	3.69176	164049
412524	3.92014	12	105232	0.0423221	335304	3.18634	105232	0.0649585	412524	3.92014	105232
782133	3.22173	16	242768	0.0124432	735237	3.02856	242768	0.0699191	782133	3.22173	242768
536587	5.0749	14	105734	0.00392779	526172	4.97639	105734	0.0524378	536587	5.0749	105734
650699	3.37265	13	192934	0.0191178	591914	3.06796	192934	0.0459959	650699	3.37265	192934
689139	3.79204	12	181733	0.0316671	589670	3.24471	181733	0.0701214	689139	3.79204	181733
611847	3.65086	9	167590	0.0408717	500791	2.98819	167590	0.0523314	611847	3.65086	167590
752931	4.10294	13	183510	0.0362964	629993	3.43301	183510	0.0766412	752931	4.10294	183510
553449	2.62898	11	210518	0.0373336	460771	2.18874	210518	0.0497557	553449	2.62898	210518
378298	4.00995	15	94339.8	0.0405677	310086	3.2869	94339.8	0.0587922	378298	4.00995	94339.8
774536	3.02832	15	255765	0.0482173	612047	2.39301	255765	0.0674304	774536	3.02832	255765
462391	3.23639	13	142873	0.0254896	407712	2.85367	142873	0.0708323	462391	3.23639	142873
490525	2.86147	9	171424	0.0337736	415465	2.42361	171424	0.0653151	490525	2.86147	171424
566818	3.51261	12	161367	0.02359	504444	3.12607	161367	0.0670118	566818	3.51261	161367
396920	2.57921	15	153892	0.0132329	371669	2.41513	153892	0.0594793	396920	2.57921	153892
583834	3.91121	13	149272	0.0299929	503638	3.37396	149272	0.0548727	583834	3.91121	149272
500443	4.6984	12	106513	0.0315005	428555	4.02349	106513	0.0519978	500443	4.6984	106513
510742	4.0939	15	124757	0.050908	398454	3.19385	124757	0.0645928	510742	4.0939	124757
620507	4.21313	18	147280	0.0189798	564832	3.8351	147280	0.0563444	620507	4.21313	147280
567073	3.71773	13	152532	0.0230763	505940	3.31694	152532	0.0554979	567073	3.71773	152532
576837	3.84804	10	149904	0.0483774	455476	3.03845	149904	0.0427238	576837	3.84804	149904
876210	5.17417	8	169343	0.0243838	776774	4.58698	169343	0.0419354	876210	5.17417	169343
887778	3.95268	15	224601	0.0266619	778336	3.46541	224601	0.0472781	887778	3.95268	224601
617822	3.77017	15	163871	0.0308554	530731	3.23871	163871	0.0640881	617822	3.77017	163871
558219	3.67327	12	151968	0.0462849	445200	2.92957	151968	0.0585045	558219	3.67327	151968
511712	3.64054	6	140559	0.0403322	419918	2.98748	140559	0.0548467	511712	3.64054	140559
653299	4.40351	17	148359	0.0517328	507674	3.42194	148359	0.0580774	653299	4.40351	148359
489714	2.67771	10	182885	0.0582102	369048	2.01792	182885	0.0664499	489714	2.67771	182885
565369	3.26229	11	173305	0.0320003	482984	2.78691	173305	0.070506	565369	3.26229	173305
522066	4.02934	10	129566	0.0234582	464916	3.58826	129566	0.0677643	522066	4.02934	129566
698107	3.40983	11	204734	0.0270987	610746	2.98313	204734	0.0592213	698107	3.40983	204734
556187	3.65905	16	152003	0.0240076	493975	3.24977	152003	0.07094	556187	3.65905	152003
528160	4.31087	5	122518	0.030128	455313	3.71628	122518	0.06378	528160	4.31087	122518
430894	3.81399	11	112977	0.044125	347222	3.07339	112977	0.0599178	430894	3.81399	112977
667522	3.66897	7	181937	0.032348	569292	3.12906	181937	0.0596325	667522	3.66897	181937
700035	3.55122	16	197125	0.0294381	605506	3.07168	197125	0.0653368	700035	3.55122	197125
728574	4.90252	12	148612	0.0366473	608581	4.09509	148612	0.0716649	728574	4.90252	148612
735473	4.03685	14	182190	0.0377853	610983	3.35356	182190	0.052589	735473	4.03685	182190
898200	3.11376	10	288461	0.0445217	722414	2.50437	288461	0.0552593	898200	3.11376	288461
545236	3.76619	19	144771	0.0395727	449066	3.1019	144771	0.0867345	545236	3.76619	144771
756106	4.08991	17	184871	0.0409706	618572	3.34596	184871	0.0628286	756106	4.08991	184871
718090	3.65697	13	196362	0.012185	675895	3.44209	196362	0.0537931	718090	3.65697	196362
629996	2.44258	14	257923	0.0398505	518183	2.00907	257923	0.0571175	629996	2.44258	257923
716119	3.6481	16	196299	0.0244183	634744	3.23356	196299	0.0533201	716119	3.6481	196299
577296	3.19964	10	180425	0.018628	526405	2.91758	180425	0.0660569	577296	3.19964	180425
680765	3.57631	13	190354	0.0246015	602868	3.16709	190354	0.0658093	680765	3.57631	190354
428530	4.76842	11	89868.2	0.0336962	363092	4.04027	89868.2	0.05623	428530	4.76842	89868.2
563713	3.29649	19	171004	0.033365	478398	2.79759	171004	0.056596	563713	3.29649	171004
760156	3.61844	12	210078	0.0417677	619510	2.94895	210078	0.0551873	760156	3.61844	210078
606706	3.43658	12	176544	0.0211085	546536	3.09575	176544	0.0706685	606706	3.43658	176544
426570	3.16386	14	134826	0.025347	376388	2.79166	134826	0.0656475	426570	3.16386	134826
564316	2.88568	14	195557	0.0135292	527644	2.69816	195557	0.050435	564316	2.88568	195557
569587	3.61278	12	157659	0.0220949	510627	3.23881	157659	0.0605725	569587	3.61278	157659
544175	3.44603	13	157914	0.0104996	516485	3.27068	157914	0.0624297	544175	3.44603	157914
818992	4.29531	6	190671	0.0207433	739089	3.87625	190671	0.0592247	818992	4.29531	190671
524274	2.38844	9	219505	0.025244	462831	2.10852	219505	0.0718556	524274	2.38844	219505
766438	4.42231	7	173312	0.0537063	590037	3.40448	173312	0.0682607	766438	4.42231	173312
625154	2.51409	13	248661	0.050883	487770	1.96159	248661	0.0653176	625154	2.51409	248661
589425	3.7459	8	157352	0.0408892	482399	3.06573	157352	0.0849691	589425	3.7459	157352
458485	4.54812	12	100808	0.00988613	436479	4.32982	100808	0.0634605	458485	4.54812	100808
724913	3.89058	10	186325	0.0115206	684561	3.67401	186325	0.0428203	724913	3.89058	186325
547762	3.2329	14	169434	0.00704153	528878	3.12144	169434	0.0604713	547762	3.2329	169434
676468	4.02475	11	168077	0.00684831	653773	3.88972	168077	0.0635168	676468	4.02475	168077
779650	4.23679	11	184019	0.0355351	654750	3.55806	184019	0.0451753	779650	4.23679	184019
431294	3.29504	8	130892	0.0284271	374892	2.86413	130892	0.0646765	431294	3.29504	130892
675475	3.12073	15	216448	0.0345602	569942	2.63316	216448	0.0611844	675475	3.12073	216448
366119	3.9782	8	92031.5	0.0464581	291752	3.17013	92031.5	0.0660354	366119	3.9782	92031.5
525849	3.77675	10	139233	0.0158956	485977	3.49038	139233	0.0632649	525849	3.77675	139233
589701	3.8879	15	151676	0.0275317	514820	3.39421	151676	0.0517959	589701	3.8879	151676
559690	3.46557	9	161500	0.0170984	514201	3.1839	161500	0.0612878	559690	3.46557	161500
523876	2.80577	8	186714	0.0503386	409809	2.19485	186714	0.0575785	523876	2.80577	186714
648787	3.30096	11	196545	0.0348753	546591	2.78099	196545	0.0639736	648787	3.30096	196545
637488	3.19907	12	199273	0.0318763	544921	2.73455	199273	0.0612512	637488	3.19907	199273
722236	3.79768	12	190179	0.0328825	614363	3.23045	190179	0.0715619	722236	3.79768	190179
372209	3.29047	8	113117	0.0270323	325737	2.87964	113117	0.0706315	372209	3.29047	113117
509687	3.87292	5	131603	0.033716	431815	3.2812	131603	0.0550306	509687	3.87292	131603
616925	3.05879	13	201689	0.0177553	564957	2.80113	201689	0.061802	616925	3.05879	201689
695025	4.12501	10	168491	0.0445796	558847	3.31679	168491	0.0628992	695025	4.12501	168491
622050	4.28305	10	145235	0.0332931	528090	3.6361	145235	0.0503616	622050	4.28305	145235
548395	3.18197	10	172345	0.0289816	475396	2.7584	172345	0.0772837	548395	3.18197	172345
570961	3.48397	13	163882	0.0212229	514048	3.13669	163882	0.0525279	570961	3.48397	163882
446054	4.37598	10	101932	0.0125694	419047	4.11104	101932	0.0588908	446054	4.37598	101932
431014	3.9148	10	110099	0.043377	348566	3.16595	110099	0.0595588	431014	3.9148	110099
735780	4.33015	8	169920	0.0269027	644320	3.7919	169920	0.0624066	735780	4.33015	169920
561133	3.83944	14	146150	0.0155912	519363	3.55364	146150	0.0616192	561133	3.83944	146150
592124	2.66397	14	222271	0.0315362	506979	2.2809	222271	0.068733	592124	2.66397	222271
539795	5.19444	12	103918	0.0161278	498296	4.7951	103918	0.0615405	539795	5.19444	103918
670597	3.95435	11	169585	0.04678	533562	3.14629	169585	0.0528184	670597	3.95435	169585
696588	4.57348	18	152310	0.0249358	615875	4.04355	152310	0.0553751	696588	4.57348	152310
576590	3.23933	12	177997	0.0310585	494824	2.77996	177997	0.06516	576590	3.23933	177997
604604	2.98186	16	202761	0.0340508	511401	2.52219	202761	0.0677715	604604	2.98186	202761
352368	2.89201	14	121842	0.0325399	300236	2.46414	121842	0.0507159	352368	2.89201	121842
554319	4.28646	13	129319	0.0264144	486571	3.76258	129319	0.056932	554319	4.28646	129319
783616	3.60752	12	217217	0.0382821	649421	2.98973	217217	0.0448761	783616	3.60752	217217
669531	4.10997	17	162904	0.0398475	550709	3.38057	162904	0.0569894	669531	4.10997	162904
631559	4.8437	13	130388	0.0256059	556559	4.2685	130388	0.0718713	631559	4.8437	130388
612755	3.34708	12	183071	0.0390107	506042	2.76418	183071	0.049354	612755	3.34708	183071
434485	4.13681	10	105029	0.0179645	397477	3.78445	105029	0.0515511	434485	4.13681	105029
572947	3.5725	11	160377	0.0273027	500751	3.12234	160377	0.0783681	572947	3.5725	160377
519199	3.7961	14	136772	0.0290125	450018	3.29029	136772	0.0576148	519199	3.7961	136772
471378	3.68021	9	128085	0.0367169	393612	3.07306	128085	0.053395	471378	3.68021	128085
468068	3.34748	14	139827	0.0131673	438433	3.13554	139827	0.061575	468068	3.34748	139827
450297	3.7064	12	121492	0.0452857	360848	2.97015	121492	0.0565393	450297	3.7064	121492
697453	3.34985	12	208204	0.0242236	618787	2.97202	208204	0.0692787	697453	3.34985	208204
623496	4.02604	9	154866	0.0176009	571408	3.6897	154866	0.0610016	623496	4.02604	154866
730463	3.75671	16	194442	0.0293182	632194	3.25132	194442	0.0614428	730463	3.75671	194442
512351	3.85813	14	132798	0.038674	423810	3.1914	132798	0.0583358	512351	3.85813	132798
543927	3.71476	12	146423	0.0216113	488779	3.33813	146423	0.0674451	543927	3.71476	146423
670340	3.37159	9	198820	0.017406	614927	3.09288	198820	0.0666018	670340	3.37159	198820
819987	3.37366	11	243056	0.0528658	633785	2.60757	243056	0.0579382	819987	3.37366	243056
601371	4.43676	8	135543	0.0253445	530632	3.91486	135543	0.0624802	601371	4.43676	135543
501010	4.16131	11	120397	0.0417113	408422	3.39229	120397	0.0541347	501010	4.16131	120397
704102	4.52033	7	155763	0.0298505	607806	3.90211	155763	0.0493401	704102	4.52033	155763
601540	4.72972	10	127183	0.0347642	507058	3.98683	127183	0.0619902	601540	4.72972	127183
586418	4.10992	13	142683	0.0159437	541825	3.79739	142683	0.045161	586418	4.10992	142683
707203	3.29327	13	214742	0.0288579	613433	2.85661	214742	0.0779818	707203	3.29327	214742
468744	4.2316	10	110772	0.0209618	422560	3.81468	110772	0.0577717	468744	4.2316	110772
594272	3.08203	8	192819	0.0333318	504413	2.616	192819	0.0578216	594272	3.08203	192819
698763	3.68208	17	189774	0.0319264	597154	3.14666	189774	0.0564535	698763	3.68208	189774
796253	3.56841	7	223139	0.0195739	722699	3.23878	223139	0.0505869	796253	3.56841	223139
754054	4.28532	13	175962	0.0406475	617852	3.51128	175962	0.0580372	754054	4.28532	175962
607305	2.31664	17	262148	0.0274365	530434	2.02341	262148	0.0365767	607305	2.31664	262148
577694	3.20619	14	180181	0.0425214	469108	2.60354	180181	0.0621765	577694	3.20619	180181
615894	3.38105	9	182161	0.0260692	541530	2.97282	182161	0.067254	615894	3.38105	182161
655451	4.41	10	148628	0.021835	588351	3.95854	148628	0.0515274	655451	4.41	148628
625011	3.75305	16	166534	0.0245958	553509	3.3237	166534	0.06976	625011	3.75305	166534
464436	3.08395	14	150598	0.0198608	420941	2.79513	150598	0.0559356	464436	3.08395	150598
595703	3.84807	16	154806	0.0446581	478806	3.09294	154806	0.0570822	595703	3.84807	154806
488944	4.43913	16	110144	0.0275135	426895	3.87579	110144	0.0581559	488944	4.43913	110144
650727	3.15317	10	206372	0.0285084	565405	2.73973	206372	0.0486304	650727	3.15317	206372
727042	3.33134	8	218243	0.0193344	660657	3.02716	218243	0.0599118	727042	3.33134	218243
570702	3.00143	14	190144	0.0519644	443001	2.32982	190144	0.0666252	570702	3.00143	190144
839414	4.38605	14	191383	0.0343536	708975	3.70449	191383	0.0724306	839414	4.38605	191383
820641	4.50181	9	182291	0.0323485	699877	3.83933	182291	0.0694903	820641	4.50181	182291
690556	3.93145	15	175649	0.0254461	609025	3.46728	175649	0.0563078	690556	3.93145	175649
619429	2.94761	16	210146	0.0331952	526114	2.50356	210146	0.081931	619429	2.94761	210146
499704	3.82213	13	130740	0.0407141	409313	3.13075	130740	0.0711237	499704	3.82213	130740
584297	3.75171	10	155742	0.0319837	499194	3.20527	155742	0.056921	584297	3.75171	155742
657607	3.22394	8	203976	0.0474399	521580	2.55706	203976	0.0537317	657607	3.22394	203976
626497	3.10977	9	201461	0.0286224	544051	2.70053	201461	0.0686019	626497	3.10977	201461
632603	2.60995	9	242381	0.0260051	556396	2.29554	242381	0.0570455	632603	2.60995	242381
597989	3.57122	8	167447	0.036884	498933	2.97965	167447	0.0564589	597989	3.57122	167447
519714	3.06144	10	169761	0.0498847	407433	2.40003	169761	0.071138	519714	3.06144	169761
690080	3.59683	14	191858	0.0429646	559180	2.91455	191858	0.085776	690080	3.59683	191858
628029	4.84039	11	129748	0.0239072	558055	4.30108	129748	0.0644413	628029	4.84039	129748
367064	4.33569	13	84661	0.0282409	319350	3.77211	84661	0.0593298	367064	4.33569	84661
640484	2.55601	15	250579	0.0241185	568535	2.26888	250579	0.0707489	640484	2.55601	250579
733126	2.86859	13	255570	0.0453719	587252	2.29781	255570	0.071021	733126	2.86859	255570
559329	3.1334	12	178505	0.0483797	441646	2.47413	178505	0.0695582	559329	3.1334	178505
532445	3.35025	9	158927	0.0491751	418827	2.63534	158927	0.0512964	532445	3.35025	158927
550249	3.45523	14	159251	0.00850597	527432	3.31195	159251	0.0614523	550249	3.45523	159251
683074	3.19641	11	213700	0.0227452	610422	2.85644	213700	0.0402946	683074	3.19641	213700
434096	3.38276	17	128326	0.0300552	374355	2.91721	128326	0.0569094	434096	3.38276	128326
735444	3.57814	9	205538	0.0223063	658634	3.20444	205538	0.0349515	735444	3.57814	205538
652003	2.76203	14	236060	0.0337074	552410	2.34013	236060	0.0545266	652003	2.76203	236060
555004	2.57184	7	215800	0.019301	504410	2.33739	215800	0.0556773	555004	2.57184	215800
503524	2.98828	11	168500	0.0381134	417634	2.47854	168500	0.0515476	503524	2.98828	168500
681779	3.94241	9	172935	0.0394474	561864	3.24899	172935	0.0508972	681779	3.94241	172935
754321	4.76084	12	158443	0.0287712	654579	4.13132	158443	0.0573661	754321	4.76084	158443
533887	4.33704	16	123099	0.021295	480500	3.90335	123099	0.056594	533887	4.33704	123099
767642	3.31423	16	231620	0.0209315	692111	2.98813	231620	0.0750455	767642	3.31423	231620
682344	2.85454	5	239038	0.0236812	606987	2.53929	239038	0.0534086	682344	2.85454	239038
606849	3.70984	11	163578	0.051937	471120	2.8801	163578	0.0602184	606849	3.70984	163578
422265	3.65994	15	115375	0.0298136	364579	3.15995	115375	0.0457775	422265	3.65994	115375
634689	3.8076	9	166690	0.0359329	531989	3.19149	166690	0.0471027	634689	3.8076	166690
549360	3.60396	13	152432	0.0316778	470042	3.08361	152432	0.0503175	549360	3.60396	152432
681598	4.71719	9	144492	0.0418984	555138	3.84199	144492	0.0826477	681598	4.71719	144492
693945	3.61097	11	192177	0.0455837	555305	2.88955	192177	0.0769037	693945	3.61097	192177
621643	3.4187	14	181836	0.0252512	548769	3.01793	181836	0.0557619	621643	3.4187	181836
414331	4.22118	12	98155.4	0.0438317	334346	3.40629	98155.4	0.0619598	414331	4.22118	98155.4
513669	4.12087	16	124651	0.0418036	418557	3.35784	124651	0.0729709	513669	4.12087	124651
745489	4.50251	12	165572	0.0177241	682796	4.12387	165572	0.0588146	745489	4.50251	165572
608737	3.7581	19	161980	0.0306679	523403	3.23128	161980	0.0523327	608737	3.7581	161980
618487	3.33591	16	185403	0.0222007	554179	2.98905	185403	0.071322	618487	3.33591	185403
724883	3.38291	12	214278	0.0334866	614814	2.86924	214278	0.0426015	724883	3.38291	214278
644892	3.74319	10	172284	0.0404041	529026	3.07066	172284	0.0478574	644892	3.74319	172284
621955	3.83897	8	162011	0.0278602	542112	3.34615	162011	0.0581751	621955	3.83897	162011
664704	3.38241	12	196518	0.0376635	552517	2.81154	196518	0.0809045	664704	3.38241	196518
402239	3.90598	17	102980	0.0313482	344713	3.34737	102980	0.0567596	402239	3.90598	102980
658239	2.00638	11	328073	0.0247205	582581	1.77577	328073	0.0742294	658239	2.00638	328073
407590	3.67305	17	110968	0.0395257	335775	3.02587	110968	0.0584092	407590	3.67305	110968
589508	3.70208	11	159237	0.0338331	499158	3.13468	159237	0.0531126	589508	3.70208	159237
477728	4.41098	15	108304	0.0278544	416412	3.84483	108304	0.0508801	477728	4.41098	108304
597782	3.61776	20	165236	0.0411409	488647	2.95728	165236	0.0566611	597782	3.61776	165236
556386	4.12915	13	134746	0.027879	484916	3.59874	134746	0.0620865	556386	4.12915	134746
599201	3.67937	10	162854	0.0232703	534098	3.27961	162854	0.0554637	599201	3.67937	162854
413701	3.94954	16	104747	0.0462514	329994	3.1504	104747	0.0706767	413701	3.94954	104747
355375	3.4014	15	104479	0.0300445	306483	2.93344	104479	0.0512591	355375	3.4014	104479
524045	3.32244	21	157729	0.0242902	464786	2.94674	157729	0.0601574	524045	3.32244	157729
630713	3.61588	8	174429	0.0482375	498349	2.85704	174429	0.0526175	630713	3.61588	174429
473680	3.87804	15	122144	0.0308098	406999	3.33211	122144	0.0691547	473680	3.87804	122144
495340	4.76839	12	103880	0.0298181	427662	4.11689	103880	0.0646312	495340	4.76839	103880
790640	3.28117	15	240963	0.0299305	682243	2.83132	240963	0.0510265	790640	3.28117	240963
404542	3.90258	19	103660	0.0268821	354291	3.41782	103660	0.0613377	404542	3.90258	103660
531090	3.07993	12	172436	0.0226923	474726	2.75306	172436	0.0577498	531090	3.07993	172436
740147	3.65908	11	202277	0.0352497	622433	3.07713	202277	0.0588519	740147	3.65908	202277
364543	3.21267	14	113471	0.0285544	316674	2.7908	113471	0.0584744	364543	3.21267	113471
524006	3.02205	16	173394	0.0449534	420583	2.42559	173394	0.0740971	524006	3.02205	173394
448823	3.80647	12	117911	0.0328594	381829	3.23829	117911	0.0586105	448823	3.80647	117911
554767	4.30954	15	128730	0.0311836	475807	3.69616	128730	0.0598202	554767	4.30954	128730
691607	3.30521	13	209248	0.028666	600465	2.86964	209248	0.0753953	691607	3.30521	209248
550921	3.59955	9	153053	0.0310557	472801	3.08914	153053	0.041037	550921	3.59955	153053
512940	4.33794	18	118245	0.0154806	475016	4.01722	118245	0.0755345	512940	4.33794	118245
583836	3.94065	16	148157	0.0199833	528841	3.56946	148157	0.0486321	583836	3.94065	148157
650267	3.91435	18	166124	0.030841	558642	3.3628	166124	0.0609482	650267	3.91435	166124
556711	4.85836	9	114588	0.0419014	453416	3.95691	114588	0.0694046	556711	4.85836	114588
572789	3.42404	13	167284	0.0258425	504186	3.01395	167284	0.0674115	572789	3.42404	167284
534621	3.8201	13	139949	0.0286499	464203	3.31694	139949	0.0586707	534621	3.8201	139949
500170	2.90545	7	172149	0.0336549	423877	2.46227	172149	0.0614893	500170	2.90545	172149
428782	2.84074	12	150940	0.0187639	390722	2.58859	150940	0.0702085	428782	2.84074	150940
810969	3.26063	10	248715	0.0235573	721844	2.90229	248715	0.0561359	810969	3.26063	248715
518941	3.53682	8	146725	0.0409723	424543	2.89346	146725	0.0705188	518941	3.53682	146725
427808	3.82141	13	111950	0.0383353	354455	3.16618	111950	0.0642874	427808	3.82141	111950
804779	2.80332	9	287081	0.0344127	679528	2.36702	287081	0.0501174	804779	2.80332	287081
718430	3.83712	15	187232	0.0150556	666707	3.56087	187232	0.0530624	718430	3.83712	187232
700509	3.24713	15	215731	0.028916	607455	2.81579	215731	0.0585745	700509	3.24713	215731
541365	3.28771	14	164663	0.0328185	460649	2.79752	164663	0.0486854	541365	3.28771	164663
497599	4.29966	11	115730	0.0399557	409077	3.53476	115730	0.0791901	497599	4.29966	115730
574178	3.3859	17	169579	0.0260109	504994	2.97793	169579	0.0703635	574178	3.3859	169579
497461	3.90341	10	127442	0.0459885	397305	3.11752	127442	0.052104	497461	3.90341	127442
723281	3.81076	9	189800	0.0240633	642205	3.38359	189800	0.0549941	723281	3.81076	189800
545899	4.02887	9	135497	0.0475424	432767	3.19393	135497	0.066607	545899	4.02887	135497
567207	3.26769	9	173581	0.0311831	486478	2.8026	173581	0.0502915	567207	3.26769	173581
342543	3.69569	11	92687.2	0.0372347	285319	3.07829	92687.2	0.0352457	342543	3.69569	92687.2
613722	3.71814	10	165061	0.0262033	539268	3.26708	165061	0.0635087	613722	3.71814	165061
722313	4.40607	19	163936	0.0384804	598045	3.64804	163936	0.0550996	722313	4.40607	163936
526765	3.80286	6	138518	0.0402963	432346	3.12123	138518	0.0704482	526765	3.80286	138518
619428	3.91571	10	158191	0.0211112	557989	3.52732	158191	0.0625709	619428	3.91571	158191
732031	4.24969	9	172255	0.0184947	667937	3.8776	172255	0.0486014	732031	4.24969	172255
602075	3.64854	14	165018	0.0184292	549536	3.33016	165018	0.065833	602075	3.64854	165018
436731	3.94391	11	110736	0.0431435	353585	3.19305	110736	0.0680352	436731	3.94391	110736
432476	4.05692	14	106602	0.0295314	373908	3.50751	106602	0.0644449	432476	4.05692	106602
585248	3.57626	11	163648	0.0273512	511382	3.12488	163648	0.0530908	585248	3.57626	163648
693557	3.67173	6	188891	0.0380889	575320	3.04578	188891	0.03469	693557	3.67173	188891
511071	3.53302	13	144656	0.034573	431197	2.98085	144656	0.0857321	511071	3.53302	144656
503842	2.85987	8	176177	0.0344972	425253	2.41379	176177	0.0537892	503842	2.85987	176177
728270	3.08777	9	235857	0.0428555	590435	2.50336	235857	0.0738424	728270	3.08777	235857
504111	3.81542	10	132125	0.0524727	390366	2.95453	132125	0.0790832	504111	3.81542	132125
667960	3.69947	10	180556	0.0157406	617784	3.42157	180556	0.0575672	667960	3.69947	180556
679093	3.57551	10	189929	0.0295638	587034	3.09081	189929	0.078746	679093	3.57551	189929
462973	3.77118	8	122766	0.0281452	402980	3.2825	122766	0.0693462	462973	3.77118	122766
589851	4.22917	14	139472	0.0295781	509854	3.6556	139472	0.0852581	589851	4.22917	139472
831781	4.1301	19	201395	0.0267021	729100	3.62025	201395	0.0587834	831781	4.1301	201395
613632	4.01887	12	152688	0.0156039	567919	3.71948	152688	0.0448896	613632	4.01887	152688
403410	4.05571	11	99467.3	0.0184888	368100	3.70071	99467.3	0.0590067	403410	4.05571	99467.3
647868	3.48002	17	186168	0.00990191	616724	3.31272	186168	0.0471496	647868	3.48002	186168
644544	2.93697	9	219459	0.0242517	571767	2.60535	219459	0.0610892	644544	2.93697	219459
617393	3.98894	15	154776	0.021598	554832	3.58473	154776	0.0532594	617393	3.98894	154776
606131	3.78161	15	160284	0.0198377	549429	3.42784	160284	0.0632064	606131	3.78161	160284
577766	3.27684	9	176318	0.0338834	489096	2.77394	176318	0.0608466	577766	3.27684	176318
664328	3.66565	10	181231	0.0468133	528489	2.91611	181231	0.0433699	664328	3.66565	181231
614100	3.66168	14	167710	0.0211317	553134	3.29816	167710	0.0518161	614100	3.66168	167710
563095	3.96465	17	142029	0.030502	484548	3.41162	142029	0.0439992	563095	3.96465	142029
628045	4.05998	14	154692	0.0324826	535275	3.46027	154692	0.0574112	628045	4.05998	154692
611965	2.99872	14	204076	0.0252531	540221	2.64716	204076	0.076	611965	2.99872	204076
498321	3.26068	15	152827	0.0234443	443801	2.90393	152827	0.0789701	498321	3.26068	152827
474123	3.3014	6	143613	0.0183838	432846	3.01398	143613	0.0657424	474123	3.3014	143613
586010	3.84183	12	152534	0.0261778	514982	3.37618	152534	0.0655811	586010	3.84183	152534
605845	4.32446	10	140097	0.0486664	477721	3.40992	140097	0.0481016	605845	4.32446	140097
531585	3.10444	15	171234	0.0386525	439766	2.56822	171234	0.0552546	531585	3.10444	171234
562418	3.71874	12	151239	0.0233862	501027	3.31282	151239	0.0589491	562418	3.71874	151239
576609	5.37322	9	107312	0.0293413	498981	4.64984	107312	0.0548506	576609	5.37322	107312
514284	3.72961	11	137892	0.0344543	434157	3.14852	137892	0.0540325	514284	3.72961	137892
489810	3.10106	17	157949	0.0272027	428299	2.71162	157949	0.0774602	489810	3.10106	157949
733048	3.84169	14	190814	0.018852	667693	3.49918	190814	0.0496979	733048	3.84169	190814
579570	3.45323	8	167834	0.0308228	497950	2.96692	167834	0.081222	579570	3.45323	167834
464976	1.96676	11	236418	0.0290972	402855	1.704	236418	0.0484699	464976	1.96676	236418
691180	4.22547	15	163575	0.0354019	580826	3.55083	163575	0.0690284	691180	4.22547	163575
454307	3.56391	14	127475	0.0400918	373243	2.92798	127475	0.0510414	454307	3.56391	127475
554577	2.92737	18	189446	0.0342529	468628	2.47368	189446	0.0752769	554577	2.92737	189446
566853	3.6737	9	154300	0.0463613	451920	2.92884	154300	0.0593221	566853	3.6737	154300
561990	3.51674	15	159804	0.0385885	465062	2.9102	159804	0.0623041	561990	3.51674	159804
667583	2.93589	13	227387	0.0366167	557718	2.45272	227387	0.0678478	667583	2.93589	227387
700393	3.99755	11	175206	0.0240144	622030	3.55029	175206	0.0527276	700393	3.99755	175206
651268	3.6605	10	177918	0.0338026	551533	3.09994	177918	0.0683961	651268	3.6605	177918
746707	4.07422	10	183276	0.0470285	593414	3.23781	183276	0.0573675	746707	4.07422	183276
744547	3.94704	8	188634	0.0240123	661250	3.50547	188634	0.0696513	744547	3.94704	188634
619228	3.66096	14	169144	0.0253844	546283	3.2297	169144	0.0648984	619228	3.66096	169144
589268	3.95713	15	148913	0.0416249	480570	3.22718	148913	0.0597778	589268	3.95713	148913
746601	3.47085	7	215106	0.0379422	619759	2.88118	215106	0.0531169	746601	3.47085	215106
666781	2.7516	12	242324	0.023712	593054	2.44736	242324	0.0729091	666781	2.7516	242324
439371	3.75957	17	116867	0.00219651	434577	3.71855	116867	0.0630072	439371	3.75957	116867
678611	3.59573	10	188727	0.026618	595082	3.15313	188727	0.0614509	678611	3.59573	188727
591732	3.83452	9	154317	0.0325221	504229	3.26749	154317	0.057015	591732	3.83452	154317
555914	3.51084	15	158342	0.0208899	501317	3.16604	158342	0.05105	555914	3.51084	158342
500851	4.13461	7	121136	0.0332792	425226	3.51032	121136	0.0609797	500851	4.13461	121136
516027	3.49628	19	147593	0.0313738	442173	2.99589	147593	0.067694	516027	3.49628	147593
579704	3.73607	18	155164	0.0340923	490241	3.1595	155164	0.0476181	579704	3.73607	155164
663424	4.69465	9	141315	0.0325091	565355	4.00068	141315	0.0597281	663424	4.69465	141315
547382	3.1702	10	172665	0.0392962	451433	2.61451	172665	0.0689075	547382	3.1702	172665
611439	3.98799	13	153320	0.024036	542971	3.54142	153320	0.0740119	611439	3.98799	153320
490548	3.37348	14	145413	0.0112003	463976	3.19074	145413	0.0635096	490548	3.37348	145413
566239	2.90844	8	194688	0.0361356	474151	2.43544	194688	0.059536	566239	2.90844	194688
631523	3.57337	10	176731	0.0181089	577322	3.26668	176731	0.0680596	631523	3.57337	176731
384635	3.9141	10	98269	0.0292862	332942	3.38806	98269	0.0592144	384635	3.9141	98269
695534	3.44898	8	201664	0.0321971	593615	2.94359	201664	0.0555523	695534	3.44898	201664
761412	4.22277	9	180311	0.0450673	610799	3.38747	180311	0.0493884	761412	4.22277	180311
298061	4.27617	8	69702.8	0.0303663	256653	3.68211	69702.8	0.0593937	298061	4.27617	69702.8
531617	3.61495	8	147061	0.0488208	418883	2.84836	147061	0.059062	531617	3.61495	147061
552749	3.94806	8	140005	0.0436145	446506	3.18921	140005	0.0585141	552749	3.94806	140005
789266	2.55533	19	308871	0.0292872	683189	2.21189	308871	0.0650841	789266	2.55533	308871
782363	2.99037	7	261628	0.0348942	659065	2.5191	261628	0.0700389	782363	2.99037	261628
571890	4.03882	17	141598	0.0372595	476294	3.3637	141598	0.0708536	571890	4.03882	141598
611060	3.18286	15	191984	0.0230407	545280	2.84023	191984	0.0645819	611060	3.18286	191984
428294	3.70046	9	115741	0.036266	358415	3.0967	115741	0.0643056	428294	3.70046	115741
654630	4.37104	9	149765	0.0284594	568932	3.79882	149765	0.0531712	654630	4.37104	149765
786828	3.61006	18	217954	0.035237	661730	3.0361	217954	0.0737529	786828	3.61006	217954
384235	3.56933	15	107649	0.0265947	336978	3.13034	107649	0.0731769	384235	3.56933	107649
590115	3.60015	12	163914	0.0172445	541764	3.30517	163914	0.0577037	590115	3.60015	163914
673492	4.01434	12	167771	0.0395431	554779	3.30675	167771	0.0584699	673492	4.01434	167771
363253	3.82054	12	95078.9	0.0298812	313526	3.29753	95078.9	0.0724095	363253	3.82054	95078.9
531704	4.37529	14	121524	0.0386262	439920	3.62001	121524	0.0633752	531704	4.37529	121524
560356	3.8867	11	144173	0.0330381	476302	3.30369	144173	0.0683595	560356	3.8867	144173
752237	3.70341	7	203120	0.047028	597810	2.94314	203120	0.0510659	752237	3.70341	203120
[truncated: 8,002 more rows]

## Sheet: Cost-Effectiveness Plane
ID	ΔCost	ΔQALY
1	530328	3.24386
2	740457	3.95937
3	861710	3.50165
4	641385	3.95848
5	637910	2.88872
6	604286	4.05402
7	563050	4.14774
8	506602	3.60104
9	866363	2.53252
10	676644	3.21348
11	580962	3.28089
12	431754	4.17995
13	642180	3.59957
14	726644	3.21453
15	494319	4.2251
16	526467	3.45218
17	723487	2.57279
18	456913	3.77228
19	803329	3.46123
20	483654	4.48501
21	540938	4.66776
22	518239	4.5155
23	555977	3.94057
24	584019	4.10179
25	838682	3.63065
26	766903	4.07709
27	542334	3.68834
28	595901	3.8855
29	590395	3.85125
30	713541	3.73067
31	643023	2.69997
32	507418	3.40621
33	479048	4.53511
34	576495	3.82057
35	629676	3.89762
36	524010	3.84647
37	954467	4.12416
38	700776	3.65482
39	451548	3.17815
40	451311	3.37208
41	932725	3.94228
42	524977	3.82953
43	950014	4.53919
44	544061	2.69052
45	790046	3.08081
46	661376	5.05659
47	664349	3.82746
48	707320	3.69208
49	592511	5.07391
50	669661	3.1157
51	587490	3.87744
52	464003	3.10806
53	392144	3.12594
54	746420	4.29092
55	767998	4.29169
56	504979	3.41028
57	616804	3.15179
58	696757	3.41846
59	400289	2.54719
60	678723	3.61161
61	483713	3.67451
62	480737	4.18565
63	538791	4.45071
64	467513	3.65336
65	542741	4.08708
66	570308	4.07676
67	740035	4.30503
68	811668	3.35508
69	565649	3.04251
70	452909	4.75212
71	492357	3.53558
72	763709	4.42074
73	546188	3.48696
74	572567	3.20944
75	623795	4.29415
76	457290	3.56187
77	646612	3.87545
78	561704	3.43938
79	463859	3.02768
80	663150	3.29433
81	541300	4.35016
82	584927	3.74395
83	438266	3.9651
84	703541	3.71697
85	613962	3.11312
86	379967	4.54921
87	533327	3.66104
88	594273	3.38087
89	547902	3.57408
90	550541	3.1121
91	170450	3.20327
92	551299	4.16129
93	637703	2.9643
94	551853	3.00115
95	546257	2.99736
96	447019	3.73086
97	701892	3.54645
98	561431	4.87469
99	594550	2.79763
100	656564	3.7309
101	334423	3.45547
102	560910	3.31137
103	662936	3.79128
104	770627	3.84967
105	535871	3.65306
106	536862	3.76476
107	696484	4.40581
108	613199	3.45798
109	377278	4.68819
110	414131	3.51984
111	701015	4.68403
112	728356	3.82655
113	592318	3.78932
114	567850	4.61522
115	588395	3.99382
116	735375	3.70182
117	503258	4.15786
118	585942	3.95494
119	669516	3.9787
120	646648	3.75521
121	725023	4.26196
122	519718	3.58933
123	391230	3.23074
124	524436	4.16183
125	549084	4.39271
126	615004	3.6027
127	400996	4.318
128	583737	4.03608
129	756046	3.32831
130	622776	3.05331
131	396818	3.63124
132	652786	3.56871
133	504970	3.90128
134	460574	4.10532
135	729372	2.87397
136	733332	3.47451
137	594980	3.82681
138	599153	3.0895
139	546745	4.59328
140	707608	2.73247
141	670019	3.30982
142	563712	4.32992
143	729443	3.9163
144	553896	3.89082
145	397959	3.89932
146	729538	3.86237
147	607459	3.6582
148	742594	2.94936
149	575030	3.65303
150	758278	3.51084
151	350683	3.62058
152	645943	3.61374
153	621195	3.47626
154	643554	3.45163
155	636634	3.90891
156	577865	3.71826
157	616437	4.59571
158	381400	3.53151
159	533769	3.37211
160	707893	3.39943
161	677811	3.83856
162	347582	3.52896
163	592231	3.45042
164	756953	3.28376
165	436441	3.06128
166	557272	4.0199
167	560576	3.39671
168	600054	3.15652
169	689444	3.56487
170	751587	2.7843
171	756134	3.28739
172	740419	4.56745
173	553418	2.91697
174	572746	4.33647
175	700229	4.41802
176	573216	3.41698
177	538060	5.19488
178	647036	4.38025
179	457544	3.60257
180	574507	4.06318
181	673927	3.78009
182	611014	3.0446
183	723848	3.19113
184	599396	4.0179
185	649840	2.31202
186	626612	3.39533
187	477325	4.14253
188	752890	3.24347
189	646048	2.84718
190	923055	4.02685
191	470705	3.35825
192	443678	3.64076
193	776280	3.28815
194	548449	3.36015
195	487738	3.73608
196	697997	4.46666
197	758042	3.49606
198	599082	3.05963
199	536762	4.50955
200	509548	4.90029
201	677198	4.08917
202	675979	3.12842
203	538480	3.71925
204	524344	2.75145
205	607714	3.37212
206	541516	3.24062
207	678887	4.2597
208	529869	4.05471
209	432202	3.69785
210	625690	3.59716
211	751194	3.17633
212	728762	3.93435
213	593029	3.67323
214	580024	3.91914
215	793607	3.32892
216	287092	4.42971
217	404585	3.29259
218	828896	4.12979
219	391799	4.5809
220	687183	4.43348
221	492700	3.04679
222	372944	3.28842
223	675467	3.63618
224	861582	3.79217
225	354869	4.51077
226	637208	3.47706
227	418432	4.26946
228	646283	3.40333
229	643385	3.09368
230	776281	4.05358
231	538427	4.32713
232	690070	2.94615
233	868051	3.92036
234	607174	3.98027
235	583338	4.61515
236	557130	3.66823
237	526482	4.18571
238	504674	3.81224
239	671539	4.02281
240	603154	3.12822
241	586723	4.04754
242	674468	4.69789
243	631198	4.51519
244	556484	3.57465
245	576243	3.63671
246	492088	3.60304
247	538863	3.54602
248	503939	2.76031
249	510486	2.78702
250	438704	3.50576
251	485395	3.00695
252	530181	3.87381
253	591870	3.39517
254	502787	3.40317
255	769117	2.77505
256	679969	3.51681
257	569654	3.93742
258	622242	3.2086
259	366576	3.086
260	474696	3.90322
261	496613	4.13918
262	845727	3.41839
263	539992	4.21523
264	368434	4.45218
265	811773	3.63819
266	324007	4.04543
267	617543	3.55532
268	500820	3.32859
269	470486	4.15402
270	705985	3.76631
271	516777	3.42014
272	611469	4.0134
273	367884	2.81954
274	701982	3.99331
275	457463	3.24691
276	703759	3.17066
277	396683	2.90225
278	622205	4.15564
279	606938	3.93357
280	565888	3.18983
281	899615	2.82914
282	498805	3.43715
283	371125	3.32857
284	600446	4.60612
285	426322	2.91682
286	479461	4.44362
287	516710	3.58501
288	649464	3.28693
289	755315	3.73718
290	610739	3.01355
291	498415	4.03
292	448447	4.73874
293	484116	3.99602
294	583258	3.45761
295	562883	4.038
296	577220	3.37976
297	813436	3.46412
298	537637	3.77962
299	693121	2.58536
300	590708	4.09701
301	678897	3.43611
302	721351	3.52163
303	533250	4.4674
304	639542	3.86255
305	578177	5.12072
306	666379	3.34989
307	408020	3.6854
308	631680	3.37555
309	412188	3.4952
310	607626	3.80903
311	851771	2.54236
312	708300	3.23474
313	558107	4.2102
314	506074	3.47089
315	358109	2.99334
316	767340	3.361
317	784827	3.42447
318	487081	4.2104
319	330094	4.41928
320	644891	3.50728
321	738594	4.25625
322	827219	3.91526
323	751710	2.79653
324	639741	3.0306
325	512210	3.6445
326	477281	3.05751
327	388537	3.63992
328	502380	3.09669
329	317818	3.82741
330	532762	4.14138
331	766087	3.47918
332	508580	3.32473
333	696039	3.58165
334	511613	4.19493
335	455849	3.90823
336	538635	3.00709
337	596343	4.40447
338	471923	3.16661
339	431526	4.3182
340	453127	3.90968
341	501427	2.27144
342	737599	2.53053
343	611047	2.91591
344	799920	4.35076
345	676165	3.37098
346	686438	2.707
347	625472	3.42527
348	718612	4.32293
349	403020	4.29183
350	830057	3.22533
351	752650	3.13095
352	284618	2.3789
353	508846	3.96961
354	609274	4.07283
355	470268	2.6028
356	566563	2.2232
357	650038	4.60224
358	560343	3.22593
359	689165	4.32176
360	328087	3.62684
361	627457	4.08922
362	720561	3.86895
363	564113	3.86242
364	373811	3.85953
365	632406	3.79314
366	702888	3.6673
367	632761	4.54849
368	391144	4.14311
369	627299	3.24917
370	709744	3.7709
371	380866	4.85359
372	697663	3.31995
373	531651	4.36914
374	394056	2.57238
375	334863	3.54423
376	551546	3.458
377	519831	3.41741
378	532334	2.77456
379	430269	3.79521
380	494455	3.96505
381	521198	2.88862
382	452414	3.48295
383	761788	3.32761
384	514731	3.53925
385	615614	3.771
386	480016	4.81768
387	632521	3.75192
388	726806	4.14756
389	765307	4.28973
390	743429	3.90763
391	782968	4.51411
392	539415	3.19855
393	522535	3.68706
394	488635	2.82552
395	529706	3.9759
396	697871	4.82043
397	569612	3.49079
398	529129	3.22612
399	511625	3.58504
400	492926	3.06444
401	432368	3.21853
402	670740	2.7514
403	625886	4.23207
404	518810	2.45912
405	757673	3.74015
406	436088	3.00328
407	644549	4.022
408	521041	3.35856
409	611876	3.48979
410	587958	2.93028
411	622916	3.98162
412	697893	4.39666
413	640544	3.86197
414	505089	2.76914
415	901022	3.19968
416	758131	4.14145
417	553372	2.40941
418	400920	3.9165
419	496651	3.31336
420	456800	2.69632
421	783680	3.64025
422	486577	3.00418
423	618316	3.63857
424	503816	3.85868
425	673222	3.74322
426	420712	4.87784
427	358005	3.91048
428	476679	4.21273
429	448947	3.05415
430	453620	3.79992
431	551741	2.98999
432	700000	3.23669
433	558540	1.96676
434	469739	4.38833
435	803293	3.77304
436	644991	3.38501
437	551559	3.35098
438	601030	3.73515
439	519983	3.27749
440	641319	3.94465
441	543054	2.4706
442	470553	3.11201
443	621699	3.79444
444	696836	4.30124
445	620139	2.87752
446	857950	5.06253
447	662424	3.6439
448	512758	3.72153
449	469909	3.47913
450	428863	3.94642
451	609087	3.44345
452	500782	3.98303
453	519647	4.24996
454	447979	3.35757
455	517211	2.95777
456	531122	3.37226
457	699891	3.87733
458	629117	3.5948
459	661210	4.02876
460	503220	3.37713
461	481313	3.29281
462	563063	3.94571
463	699006	3.06357
464	552230	3.62734
465	744228	3.65266
466	740382	3.86149
467	644262	3.86258
468	594011	3.56639
469	674160	3.25954
470	503301	4.37129
471	751354	4.02772
472	565216	3.09466
473	523181	3.60461
474	853557	4.46969
475	579241	4.01666
476	541515	2.98392
477	657673	3.57238
478	530772	3.2497
479	726557	3.98932
480	666372	3.31294
481	430033	3.91263
482	657342	4.43248
483	747736	3.66239
484	539529	4.12739
485	497598	3.72549
486	627009	4.19351
487	618731	2.33745
488	659269	4.41772
489	721412	3.50928
490	769801	4.1555
491	537440	3.55597
492	414702	3.56009
493	556265	3.73175
494	369620	3.84526
495	572353	4.7478
496	605271	4.71825
497	540044	3.30284
498	619545	3.54498
499	629815	3.41608
500	362459	3.9727
501	507351	3.97234
502	600647	3.41296
503	720029	3.38832
504	564575	3.15353
505	364169	3.26992
506	849319	3.57009
507	567152	3.87201
508	575754	3.64073
509	684468	3.50985
510	688056	3.8392
511	667977	4.75838
512	411793	3.34232
513	585762	3.86079
514	427572	2.74437
515	752574	4.10616
516	652601	3.55283
517	725794	3.42197
518	675247	3.69765
519	813430	4.39383
520	620918	3.84327
521	453636	2.65053
522	523461	2.46321
523	591889	3.49649
524	601241	4.37663
525	462211	3.75849
526	491160	3.96276
527	616469	3.92595
528	633936	3.60616
529	454641	3.1853
530	644032	3.88603
531	566388	3.86514
532	433488	2.94256
533	764574	4.65758
534	540921	4.93458
535	508202	4.92299
536	623243	3.65221
537	733216	3.55648
538	480176	3.81065
539	674213	3.1234
540	756152	3.46687
541	751506	4.44986
542	544278	3.62806
543	631678	3.44158
544	504955	2.98865
545	686249	3.28201
546	765657	3.19328
547	753052	3.64111
548	644843	2.80165
549	682198	3.60519
550	503649	4.83126
551	723579	3.53896
552	551707	3.01037
553	772801	2.99048
554	461798	3.62645
555	372097	4.10669
556	516008	4.5698
557	674134	4.82739
558	541353	3.45259
559	618494	2.33802
560	657498	4.19214
561	632241	2.94591
562	518504	3.77449
563	565495	3.4536
564	344186	3.48382
565	376653	3.46926
566	645722	4.445
567	539133	4.02527
568	597943	3.43966
569	510525	3.09829
570	473785	3.8183
571	767670	2.87911
572	637892	3.31499
573	749849	3.16282
574	465956	3.56561
575	486079	4.03294
576	420197	3.3658
577	562717	3.98365
578	623853	4.13496
579	573752	3.20672
580	689355	3.73082
581	455413	4.24261
582	655239	4.50007
583	831356	3.70597
584	661406	2.79417
585	653009	3.93666
586	517088	3.85264
587	522320	3.5136
588	578057	3.86511
589	402740	4.30755
590	743655	3.20745
591	532909	3.5027
592	354520	3.68031
593	825614	3.78002
594	674040	3.51514
595	656604	3.55987
596	496288	5.20096
597	619977	4.16807
598	588949	3.07471
599	638332	3.16132
600	482803	2.97707
601	577176	4.65754
602	579549	4.09638
603	646375	4.00034
604	728742	3.24685
605	606097	3.7544
606	513002	3.9677
607	800274	3.88419
608	446636	4.14144
609	581680	4.20837
610	581391	4.20486
611	542310	3.28502
612	613392	3.28392
613	536476	4.09844
614	733215	3.15439
615	724382	4.46355
616	496190	4.32399
617	432657	3.48341
618	483673	3.60343
619	637356	4.34538
620	573152	3.47966
621	456225	3.44177
622	580031	3.48799
623	695240	3.58281
624	568667	3.09177
625	585469	3.39769
626	624075	3.93055
627	636497	4.24456
628	739093	3.11065
629	552582	4.68858
630	582764	3.94094
631	832523	2.57706
632	167423	4.02573
633	840734	3.57775
634	575330	3.65464
635	664263	4.3743
636	679633	3.61267
637	542565	4.53675
638	630840	3.73963
639	573538	3.80415
640	462804	4.8845
641	685343	3.63622
642	807466	3.1782
643	322451	2.71889
644	588442	3.98868
645	475230	3.6205
646	830082	3.24192
647	604124	3.93805
648	613305	3.26065
649	635621	3.98858
650	670328	3.9981
651	485667	3.93767
652	475259	4.63938
653	615624	4.21473
654	603084	3.56814
655	618955	2.37665
656	340932	3.47298
657	511893	3.70784
658	489025	3.74864
659	546034	3.74625
660	685920	3.76582
661	683056	2.98464
662	385695	3.8707
663	574610	4.33939
664	712032	2.88023
665	582786	3.72277
666	351546	3.66355
667	618572	3.65698
668	547975	3.35799
669	568602	2.75249
670	606656	3.96075
671	464260	2.83593
672	505936	4.18409
673	410649	4.33105
674	497036	4.88423
675	734953	3.10496
676	462948	4.30493
677	514507	4.15577
678	731400	4.05001
679	493010	3.64419
680	686846	3.28546
681	749023	4.22579
682	678699	4.1736
683	647050	4.6622
684	690524	4.0872
685	359800	3.24669
686	648287	2.8455
687	684601	2.76819
688	654403	4.65095
689	395768	3.95975
690	527779	3.78046
691	719463	4.0061
692	661296	3.89274
693	819051	2.54952
694	473425	2.67689
695	579840	3.93547
696	465352	3.30344
697	354723	3.89096
698	498073	4.32759
699	679987	4.10531
700	495745	3.39447
701	578808	3.35917
702	502483	3.87016
703	603789	3.67071
704	674019	3.75387
705	595652	4.02153
706	668946	3.80908
707	398608	3.30348
708	604510	3.88108
709	551619	3.76151
710	561970	3.25907
711	599112	3.29718
712	584456	4.07923
713	651540	3.51064
714	615226	4.17195
715	459805	3.82923
716	475807	3.55116
717	664804	5.33922
718	616798	3.25718
719	441990	4.10856
720	546809	3.4317
721	343278	3.78305
722	611878	3.80135
723	664950	3.27353
724	605172	4.19596
725	539589	4.19167
726	672834	3.68692
727	564429	3.78257
728	425110	3.31716
729	478182	2.92445
730	672396	3.83712
731	336243	3.51189
732	605034	3.57697
733	432661	3.88307
734	619035	3.88251
735	517111	2.9468
736	678847	3.35853
737	691372	4.17456
738	503218	3.85988
739	446467	3.99077
740	565513	2.85962
741	567305	3.46763
742	360974	4.2953
743	563929	4.06681
744	671827	3.56973
745	501556	4.07318
746	606180	3.80452
747	717541	3.60766
748	429391	3.80797
749	561719	3.31389
750	557940	3.42938
751	557975	4.59189
752	840869	3.76678
753	547652	3.27223
754	625795	3.93893
755	625559	3.92341
756	409728	3.29813
757	548003	3.06995
758	598630	3.29295
759	348287	3.37874
760	570523	4.29065
761	577300	4.13551
762	561787	4.35241
763	654411	3.71399
764	691669	4.68523
765	637096	3.55401
766	441838	4.55865
767	377949	3.2344
768	652275	3.13968
769	891007	4.02095
770	677187	3.2261
771	392222	3.05645
772	679778	3.3995
773	604145	3.18586
774	590635	3.71724
775	786013	3.22931
776	653335	4.23196
777	631668	3.57425
778	558379	2.72782
779	453950	3.67581
780	515635	3.10893
781	632955	4.06621
782	607197	2.499
783	651723	3.74024
784	751992	3.59357
785	761258	4.35295
786	336816	2.63083
787	584031	3.79875
788	596542	3.06836
789	503573	4.45687
790	688721	4.21889
791	522917	3.59988
792	755362	4.01279
793	412292	4.01793
794	538786	3.18853
795	691937	4.45355
796	648056	4.15534
797	532161	3.48958
798	538413	4.11775
799	609193	4.02862
800	436983	3.85659
801	673710	3.63079
802	468118	4.00656
803	554734	3.99671
804	600363	4.74061
805	700941	4.52761
806	563519	4.27906
807	638673	4.31801
808	793597	3.78661
809	642742	3.1688
810	599394	2.21228
811	297493	4.85904
812	569262	4.07881
813	530727	3.39803
814	673197	4.11194
815	456185	3.48627
816	771297	4.35491
817	435902	3.09987
818	711716	3.82706
819	472651	3.55973
820	649550	3.35999
821	629375	3.23988
822	684679	3.55677
823	694029	3.48306
824	385850	3.55867
825	557011	3.4509
826	551683	3.8253
827	622177	4.0888
828	541285	3.26749
829	653457	3.88189
830	741114	3.47165
831	597480	3.34478
832	532820	3.76008
833	501071	3.80831
834	473936	2.97408
835	458003	3.10417
836	410913	4.34449
837	677825	3.91683
838	737635	3.36453
839	629922	3.48968
840	521283	3.72361
841	470959	4.11357
842	564879	4.18676
843	578529	3.86877
844	403796	3.72862
845	719243	3.81822
846	582034	4.10204
847	681840	4.05035
848	504968	2.96999
849	515097	4.27727
850	426237	3.80327
851	758363	3.74008
852	522030	3.21716
853	451715	2.70392
854	517808	3.33208
855	716187	3.92718
856	550992	3.63624
857	665954	4.11089
858	582308	2.72175
859	528691	4.10138
860	553693	3.40146
861	586706	2.97158
862	726234	3.76948
863	728741	3.9285
864	671328	3.83233
865	318161	3.41295
866	833065	3.07747
867	584051	3.12977
868	567995	2.9873
869	565574	3.94321
870	582707	4.25478
871	650280	3.30371
872	706401	4.20136
873	613069	3.75422
874	580956	2.98698
875	798382	4.11427
876	651673	3.31181
877	524250	3.1578
878	386710	3.39205
879	532602	4.45244
880	554894	3.84601
881	443818	3.65665
882	588870	3.48566
883	499987	3.69597
884	608845	4.45472
885	754325	5.29305
886	617143	4.27479
887	670308	3.56596
888	729313	3.56814
889	579319	3.80883
890	426972	2.8574
891	599866	4.00362
892	537880	4.21031
893	535485	2.96924
894	655100	3.72884
895	508332	2.85382
896	657349	3.3588
897	632738	4.37288
898	598442	3.60635
899	456347	4.03746
900	428325	4.59912
901	637725	3.36579
902	587502	3.35558
903	643487	4.29042
904	619990	3.79967
905	534865	3.861
906	513589	3.33832
907	506498	3.52149
908	666413	2.80338
909	960649	3.49879
910	534485	3.52124
911	707041	4.09648
912	555390	4.01096
913	634564	2.86829
914	661230	3.85128
915	638149	3.87342
916	652584	3.58429
917	657881	3.67747
918	470592	3.21462
919	486749	4.27422
920	610808	4.25748
921	564903	2.83408
922	683724	4.16367
923	570709	3.6078
924	634754	4.17738
925	466231	3.11289
926	547649	2.88116
927	349793	3.16981
928	512769	4.45289
929	573147	4.60899
930	731432	2.80239
931	447815	3.85376
932	577049	4.379
933	678100	4.31618
934	609159	4.00108
935	910232	4.79905
936	635466	3.80627
937	543020	3.53558
938	470643	2.97301
939	535890	3.87942
940	516790	3.44266
941	566689	4.88589
942	633803	4.56076
943	662395	3.30556
944	687050	3.82458
945	652158	3.83216
946	302427	3.73967
947	542852	3.20864
948	728060	4.23394
949	404691	4.17062
950	686194	3.63461
951	782896	3.71621
952	500057	3.3603
953	445076	3.66454
954	605827	2.41699
955	454086	4.25937
956	551599	3.40905
957	615548	3.30959
958	469569	3.906
959	625568	3.61584
960	635706	4.5496
961	666893	3.70892
962	518333	3.13939
963	469756	3.67446
964	592383	4.69809
965	340979	3.92805
966	551528	4.32962
967	766326	4.43033
968	400220	3.53809
969	577948	4.12255
970	354772	3.21956
971	356079	2.98462
972	484313	3.6177
973	267124	3.43889
974	536901	3.82736
975	506473	4.38139
976	517607	4.37236
977	653936	3.62724
978	636626	3.51241
979	399396	3.36573
980	564428	4.73974
981	476312	3.54357
982	508985	4.73709
983	575653	3.73878
984	467363	3.59558
985	680765	3.6808
986	610713	2.47028
987	894057	2.66701
988	307716	3.44262
989	530958	2.4611
990	579526	3.83823
991	855269	3.06394
992	556308	4.04401
993	589998	3.52985
994	626547	3.49792
995	436495	3.27065
996	923672	3.94088
997	906707	3.80772
998	463302	3.44655
999	611380	2.92794
1000	455249	4.18665
1001	476786	3.82002
1002	449901	3.23296
1003	598260	2.87167
1004	484151	3.13803
1005	686283	3.56797
1006	345234	4.06496
1007	644701	3.18162
1008	599593	4.14137
1009	538601	4.10526
1010	572725	3.73211
1011	609313	3.89084
1012	366680	3.77418
1013	642262	3.43611
1014	520623	3.34833
1015	515759	3.30403
1016	599106	3.46477
1017	607787	3.63503
1018	505750	3.3681
1019	737045	4.16635
1020	675067	3.34848
1021	687970	4.35792
1022	577431	4.38702
1023	574673	4.40389
1024	511840	3.28086
1025	755952	4.44711
1026	595847	3.38794
1027	643311	3.61122
1028	586412	3.46228
1029	444580	3.51516
1030	655129	3.29851
1031	656539	3.21062
1032	506791	3.87669
1033	704371	3.48646
1034	603142	3.51786
1035	479485	3.34448
1036	422808	4.21837
1037	480986	3.20204
1038	544747	3.00266
1039	390377	3.93507
1040	536173	4.01467
1041	566179	3.56202
1042	360306	4.25546
1043	705299	3.81914
1044	827017	3.92768
1045	703099	4.61429
1046	399644	4.07069
1047	490104	3.39576
1048	382047	3.49902
1049	349269	4.18577
1050	440375	3.69754
1051	587354	3.48125
1052	717401	3.29088
1053	636145	4.02151
1054	651645	3.99277
1055	727050	4.27448
1056	532054	3.64943
1057	564955	3.89717
1058	615881	2.9932
1059	679172	4.13303
1060	335331	4.28185
1061	578048	4.04908
1062	578881	3.11076
1063	623683	4.72987
1064	661101	3.12354
1065	428622	3.29945
1066	649495	3.54871
1067	698213	3.17525
1068	839016	4.11787
1069	518512	3.19054
1070	516213	2.50968
1071	452416	3.57479
1072	718237	3.95295
1073	640166	4.61022
1074	546244	4.11592
1075	570033	3.33021
1076	578861	3.57476
1077	787264	4.54801
1078	576545	4.09971
1079	723453	3.32939
1080	322569	3.86108
1081	605359	3.44006
1082	677718	2.54381
1083	656738	3.04667
1084	447987	4.09891
1085	575875	3.75611
1086	691683	3.95946
1087	647403	3.62201
1088	562923	2.93705
1089	798414	3.75026
1090	463761	3.88224
1091	506510	3.78176
1092	483231	4.36901
1093	433402	3.71277
1094	429671	3.83205
1095	534909	2.63235
1096	660990	4.30838
1097	560925	4.43485
1098	616043	4.15774
1099	634660	4.162
1100	572141	3.95386
1101	435700	3.66464
1102	412412	4.53867
1103	548779	3.52484
1104	704334	3.14665
1105	582102	3.86531
1106	604273	3.91164
1107	530873	3.96733
1108	578591	3.67142
1109	483378	4.29145
1110	705035	4.2912
1111	389579	3.29525
1112	600957	3.98967
1113	748842	3.52145
1114	715399	3.47673
1115	467653	4.04326
1116	430535	3.92873
1117	615661	4.14866
1118	533333	3.72356
1119	703921	3.98368
1120	603988	3.86614
1121	390017	3.79399
1122	783441	3.4721
1123	551621	3.6078
1124	350201	2.76953
1125	428039	3.75425
1126	292164	3.8976
1127	721769	4.43873
1128	513910	3.29015
1129	748410	4.04569
1130	546159	3.93042
1131	585189	3.84971
1132	560520	3.39569
1133	992398	4.14902
1134	726064	4.38017
1135	625798	4.27353
1136	338117	4.07472
1137	729411	3.39148
1138	665515	3.20083
1139	472486	5.03628
1140	479660	3.47763
1141	574486	3.37249
1142	692269	2.43741
1143	743783	3.03204
1144	532366	3.30831
1145	539330	3.27975
1146	451120	3.10263
1147	455091	3.94902
1148	612916	3.76488
1149	704281	4.21184
1150	647148	4.09877
1151	564889	3.22857
1152	672120	3.96416
1153	813116	3.65039
1154	505530	4.57771
1155	507173	3.97965
1156	371932	3.7493
1157	594976	5.17299
1158	493641	4.20313
1159	449686	3.82949
1160	613909	2.80488
1161	427537	2.96179
1162	647625	2.75636
1163	582137	3.8808
1164	435761	5.07912
1165	409913	3.25288
1166	465901	3.15486
1167	520562	4.25474
1168	450434	4.5085
1169	582295	3.59702
1170	596824	2.99917
1171	592813	2.62511
1172	480114	3.77203
1173	575035	4.95207
1174	612662	3.64953
1175	712389	4.18683
1176	521651	3.54357
1177	747634	4.2924
1178	640005	3.37168
1179	605179	3.36037
1180	634044	3.5285
1181	513314	3.42961
1182	934436	3.06785
1183	826544	3.32504
1184	559348	3.67198
1185	539546	3.47723
1186	626096	4.35942
1187	467380	3.95328
1188	368505	3.21936
1189	644392	3.50791
1190	592348	4.40554
1191	466813	3.36443
1192	733368	3.54317
1193	676117	3.97861
1194	525473	3.53413
1195	603371	4.19483
1196	515594	4.3058
1197	572020	4.3958
1198	525072	3.71405
1199	670154	3.13723
1200	490884	3.74329
1201	606698	4.12284
1202	757952	4.07234
1203	653935	4.40721
1204	810995	4.06077
1205	629178	3.80075
1206	791836	3.46764
1207	627005	4.28988
1208	482343	3.31519
1209	583163	3.37306
1210	387856	3.67064
1211	428941	3.54404
1212	574833	3.77323
1213	736751	3.34503
1214	586356	3.71863
1215	614150	4.24474
1216	667192	3.3305
1217	529552	3.37013
1218	553905	3.14429
1219	750566	3.7491
1220	551363	2.7808
1221	580612	3.44333
1222	478862	3.67514
1223	548117	4.26892
1224	419934	4.01328
1225	462839	4.017
1226	648516	2.70172
1227	501708	3.66568
1228	593708	4.59488
1229	640514	4.18093
1230	629903	4.04251
1231	485174	3.6569
1232	457032	4.01557
1233	517478	3.57263
1234	712893	3.11314
1235	537912	3.7104
1236	400884	3.75233
1237	548975	3.03547
1238	616982	2.46553
1239	444586	3.56115
1240	739790	4.29801
1241	519918	3.80876
1242	465052	3.97009
1243	500402	3.39017
1244	670978	3.54193
1245	356248	4.05527
1246	554015	4.55786
1247	411186	3.89308
1248	514173	3.76152
1249	678825	3.92832
1250	538489	4.27353
1251	597891	5.04274
1252	666725	4.45298
1253	610473	3.54689
1254	488027	3.8865
1255	434717	3.0175
1256	741423	3.67009
1257	706311	3.16601
1258	608428	3.82508
1259	447181	3.4665
1260	642477	4.36014
1261	880378	3.76744
1262	610677	4.78258
1263	642050	4.1702
1264	530014	4.75191
1265	644198	4.04057
1266	483765	4.05484
1267	698819	4.56975
1268	324127	2.47972
1269	678913	4.20169
1270	522716	3.40065
1271	425752	3.78334
1272	691140	3.43797
1273	626969	4.22194
1274	621423	3.11116
1275	729764	3.15945
1276	548395	4.49647
1277	534699	3.1223
1278	468858	4.79563
1279	857516	3.2069
1280	591797	3.56184
1281	631053	4.14007
1282	347174	4.49164
1283	561073	3.78703
1284	709919	3.66889
1285	561659	2.97224
1286	542192	4.05821
1287	603710	3.56058
1288	700261	3.68882
1289	571863	3.4912
1290	697527	3.26295
1291	709068	3.83007
1292	223858	4.18446
1293	647427	4.29413
1294	476359	2.53494
1295	586539	3.19042
1296	447655	3.84437
1297	419796	4.63234
1298	583354	3.36189
1299	687541	4.02196
1300	656798	3.72363
1301	690395	3.3849
1302	495000	3.32847
1303	499092	3.55241
1304	560067	3.49087
1305	446854	4.58417
1306	652846	3.9156
1307	666375	4.01375
1308	548968	3.2914
1309	401537	4.17495
1310	766045	4.60327
1311	533819	4.40341
1312	679038	4.07367
1313	497405	3.02925
1314	726649	4.46338
1315	612190	4.11019
1316	566898	3.88892
1317	624352	4.00933
1318	715014	4.30108
1319	593147	4.64536
1320	797152	4.72526
1321	683976	3.53242
1322	607792	3.56618
1323	607021	3.6271
1324	524611	2.71244
1325	661966	3.66249
1326	658505	3.77472
1327	880779	3.46303
1328	480613	4.28752
1329	586969	3.16127
1330	719229	4.39854
1331	557111	3.92896
1332	887671	3.01447
1333	594448	3.41088
1334	519410	4.58086
1335	603342	3.72886
1336	581612	4.42343
1337	558148	3.55344
1338	538502	3.93092
1339	571302	2.83011
1340	661555	4.51186
1341	826336	3.6475
1342	726982	3.18076
1343	828562	3.47221
1344	690946	3.56084
1345	390582	4.08756
1346	580410	4.15219
1347	630931	3.74681
1348	428290	3.52839
1349	664776	4.69493
1350	683903	3.51902
1351	599505	3.96586
1352	566826	3.58419
1353	561123	3.27422
1354	565992	3.85126
1355	476391	3.5543
1356	460565	3.10221
1357	508496	3.91607
1358	553784	3.46577
1359	543929	3.23101
1360	419463	3.55601
1361	670949	2.76288
1362	698298	3.9117
1363	471806	3.84679
1364	600295	3.02085
1365	501169	3.48741
1366	752716	3.95681
1367	447957	4.05777
1368	712461	2.30415
1369	445626	3.77659
1370	566791	3.81174
1371	535304	3.28601
1372	756289	3.98062
1373	509096	3.8083
1374	770591	2.56521
1375	616670	2.48724
1376	427958	2.38538
1377	906160	3.56971
1378	564518	4.38416
1379	715973	3.04396
1380	703098	3.17723
1381	352924	3.65414
1382	723443	3.8147
1383	581847	4.12882
1384	365196	3.41572
1385	508012	3.48029
1386	629603	2.31434
1387	715112	2.94659
1388	723739	3.18887
1389	631515	2.94835
1390	721679	3.85015
1391	496163	4.20305
1392	513279	4.64058
1393	610457	4.54266
1394	601334	4.25049
1395	625851	3.9656
1396	721441	4.05068
1397	391582	4.10218
1398	457887	3.63572
1399	647028	3.10151
1400	561411	3.72382
1401	610396	3.65067
1402	745712	3.66373
1403	588524	2.90147
1404	534469	3.88632
1405	482795	4.1241
1406	677010	3.40124
1407	629756	3.8549
1408	736527	4.41321
1409	693705	4.23253
1410	396730	4.28375
1411	420814	3.48583
1412	792954	2.68511
1413	616256	4.27128
1414	389210	3.04685
1415	602265	3.76304
1416	499231	4.00804
1417	643558	4.17437
1418	558770	3.38815
1419	729408	2.95388
1420	628133	4.19351
1421	702936	3.56283
1422	663773	5.51297
1423	852376	3.40749
1424	689555	3.33657
1425	481470	3.77435
1426	711016	3.92293
1427	416437	3.59266
1428	513805	3.99741
1429	717081	3.59009
1430	580235	3.95175
1431	580957	3.48123
1432	637169	2.80808
1433	544425	3.7299
1434	388821	2.64173
1435	380229	3.40188
1436	525418	3.85178
1437	496623	3.40512
1438	493615	3.92377
1439	532344	3.26487
1440	432905	3.58198
1441	701538	3.55885
1442	483949	3.44798
1443	691194	4.05391
1444	674108	2.95742
1445	602569	3.02895
1446	491648	3.39061
1447	766196	3.86072
1448	444897	3.53097
1449	643212	2.75335
1450	765608	3.97097
1451	702618	4.04315
1452	680068	2.87808
1453	435505	3.43431
1454	825185	3.28992
1455	549686	3.6326
1456	636637	2.92626
1457	713569	3.11114
1458	640214	4.06794
1459	575252	4.2088
1460	580030	3.1302
1461	524070	4.27826
1462	634527	2.82497
1463	485723	3.55044
1464	524939	4.48508
1465	583266	2.69928
1466	533497	3.92381
1467	773108	3.47879
1468	367516	3.57989
1469	715433	3.70749
1470	465894	4.03418
1471	478737	3.72935
1472	494162	4.68706
1473	725383	3.09232
1474	518207	4.22455
1475	615351	4.12686
1476	623589	3.46691
1477	643985	3.59248
1478	520095	2.81186
1479	676533	4.11092
1480	657028	3.07341
1481	603798	2.60265
1482	723289	3.16552
1483	316041	4.17532
1484	677135	4.13611
1485	667245	3.71383
1486	548918	3.87045
1487	479546	4.0531
1488	474743	4.19687
1489	386701	4.56945
1490	555589	2.8994
1491	577138	2.79048
1492	567950	3.89369
1493	678903	3.43776
1494	284993	4.41896
1495	407989	3.21171
1496	528002	4.07194
1497	673439	3.71957
1498	572467	3.84941
1499	596387	3.7472
1500	523241	3.56884
1501	682959	4.65372
1502	477510	3.47754
1503	644441	4.21271
1504	686552	4.34306
1505	572826	3.84072
1506	485555	4.16353
1507	841671	3.02087
1508	726874	3.80994
1509	631639	2.93234
1510	720265	3.82893
1511	339281	3.52522
1512	376007	2.76702
1513	528411	3.87011
1514	472598	3.66283
1515	607436	4.7489
1516	452234	2.89404
1517	670148	3.51652
1518	559695	3.23229
1519	714207	3.78589
1520	834378	4.04148
1521	784390	3.79892
1522	547141	4.09131
1523	553798	3.99571
1524	736278	3.09172
1525	495929	4.35612
1526	767395	3.13605
1527	552519	3.84448
1528	331924	3.56828
1529	530756	4.06912
1530	629208	4.70027
1531	565215	3.49933
1532	614282	4.10347
1533	622670	4.34967
1534	484221	3.70989
1535	591413	4.58534
1536	553611	3.49741
1537	544688	2.68654
1538	571421	3.80929
1539	613503	3.77364
1540	753719	3.37974
1541	431003	3.89798
1542	543410	3.61379
1543	507367	3.36842
1544	538370	4.02664
1545	542199	3.69371
1546	606662	3.9416
1547	620081	3.08338
1548	811950	2.7328
1549	565400	4.42622
1550	410506	3.8669
1551	532900	2.67552
1552	426104	4.59467
1553	580601	2.94383
1554	608265	4.11641
1555	525014	3.25751
1556	512566	3.29575
1557	433658	3.25361
1558	479970	3.31553
1559	604273	4.16845
1560	604334	3.6909
1561	591067	3.52064
1562	456847	4.42564
1563	645773	3.99494
1564	781201	3.41778
1565	459018	4.23347
1566	442079	3.89583
1567	584887	3.89204
1568	863852	4.72028
1569	472715	3.98927
1570	537425	3.11726
1571	562619	4.6545
1572	575924	2.58879
1573	782515	2.29236
1574	620878	2.85992
1575	534666	3.7747
1576	501509	3.4378
1577	552278	3.16734
1578	795325	3.76312
1579	732993	3.64155
1580	695753	2.99065
1581	521523	3.4418
1582	854010	3.11974
1583	443664	3.45557
1584	439042	3.58745
1585	677790	4.01543
1586	764678	4.04197
1587	647090	3.36124
1588	584210	3.35451
1589	537527	4.34645
1590	590983	2.98433
1591	738618	3.66857
1592	463264	3.33074
1593	608271	3.29646
1594	766060	3.50363
1595	449789	3.55561
1596	747034	3.05996
1597	485393	2.77906
1598	648643	3.51259
1599	835972	3.98819
1600	458785	3.74064
1601	675485	4.15949
1602	481524	3.86087
1603	625290	3.31588
1604	600668	4.21672
1605	719336	3.23279
1606	558288	3.41212
1607	447811	3.76618
1608	604726	4.28886
1609	693256	3.56731
1610	514331	4.53227
1611	827133	4.1655
1612	615675	4.11118
1613	651391	3.79515
1614	591632	3.57956
1615	496892	3.12906
1616	635416	3.76942
1617	719770	3.90764
1618	832211	2.98776
1619	808873	3.85195
1620	755399	2.63876
1621	575619	3.00695
1622	534755	2.981
1623	569397	3.27071
1624	425283	3.80293
1625	746587	5.09537
1626	675017	3.731
1627	570546	3.49123
1628	619734	4.62777
1629	683641	3.36044
1630	717438	4.66148
1631	687080	3.97106
1632	706997	4.12844
1633	470033	3.11175
1634	582270	4.53568
1635	369655	3.8324
1636	544966	3.65437
1637	607014	3.48148
1638	331238	4.11001
1639	378319	3.62824
1640	507064	3.93682
1641	619442	3.82072
1642	477925	2.88688
1643	577295	4.32251
1644	554991	4.77538
1645	693570	4.51043
1646	445842	3.17859
1647	532759	3.60495
1648	412563	3.69878
1649	555255	4.49157
1650	555592	3.03257
1651	467020	4.03711
1652	596619	3.62384
1653	630183	4.27467
1654	706221	3.63583
1655	530041	4.35901
1656	619448	3.67088
1657	676692	3.5612
1658	775093	3.83641
1659	657710	3.2745
1660	834344	3.82513
1661	806580	3.51854
1662	588114	4.71182
1663	415100	2.83152
1664	736044	2.77362
1665	666568	3.37558
1666	453874	4.12102
1667	691446	3.74675
1668	674006	3.70441
1669	557792	3.5506
1670	460782	3.4815
1671	303345	2.61652
1672	664676	4.22863
1673	510487	3.61107
1674	635823	3.35473
1675	573688	3.63458
1676	523063	2.56447
1677	449424	3.29897
1678	649194	3.31824
1679	445384	3.49489
1680	625044	2.91515
1681	639518	2.78334
1682	390134	3.58634
1683	679353	3.23931
1684	614608	3.56229
1685	605629	3.69176
1686	412524	3.92014
1687	782133	3.22173
1688	536587	5.0749
1689	650699	3.37265
1690	689139	3.79204
1691	611847	3.65086
1692	752931	4.10294
1693	553449	2.62898
1694	378298	4.00995
1695	774536	3.02832
1696	462391	3.23639
1697	490525	2.86147
1698	566818	3.51261
1699	396920	2.57921
1700	583834	3.91121
1701	500443	4.6984
1702	510742	4.0939
1703	620507	4.21313
1704	567073	3.71773
1705	576837	3.84804
1706	876210	5.17417
1707	887778	3.95268
1708	617822	3.77017
1709	558219	3.67327
1710	511712	3.64054
1711	653299	4.40351
1712	489714	2.67771
1713	565369	3.26229
1714	522066	4.02934
1715	698107	3.40983
1716	556187	3.65905
1717	528160	4.31087
1718	430894	3.81399
1719	667522	3.66897
1720	700035	3.55122
1721	728574	4.90252
1722	735473	4.03685
1723	898200	3.11376
1724	545236	3.76619
1725	756106	4.08991
1726	718090	3.65697
1727	629996	2.44258
1728	716119	3.6481
1729	577296	3.19964
1730	680765	3.57631
1731	428530	4.76842
1732	563713	3.29649
1733	760156	3.61844
1734	606706	3.43658
1735	426570	3.16386
1736	564316	2.88568
1737	569587	3.61278
1738	544175	3.44603
1739	818992	4.29531
1740	524274	2.38844
1741	766438	4.42231
1742	625154	2.51409
1743	589425	3.7459
1744	458485	4.54812
1745	724913	3.89058
1746	547762	3.2329
1747	676468	4.02475
1748	779650	4.23679
1749	431294	3.29504
1750	675475	3.12073
1751	366119	3.9782
1752	525849	3.77675
1753	589701	3.8879
1754	559690	3.46557
1755	523876	2.80577
1756	648787	3.30096
1757	637488	3.19907
1758	722236	3.79768
1759	372209	3.29047
1760	509687	3.87292
1761	616925	3.05879
1762	695025	4.12501
1763	622050	4.28305
1764	548395	3.18197
1765	570961	3.48397
1766	446054	4.37598
1767	431014	3.9148
1768	735780	4.33015
1769	561133	3.83944
1770	592124	2.66397
1771	539795	5.19444
1772	670597	3.95435
1773	696588	4.57348
1774	576590	3.23933
1775	604604	2.98186
1776	352368	2.89201
1777	554319	4.28646
1778	783616	3.60752
1779	669531	4.10997
1780	631559	4.8437
1781	612755	3.34708
1782	434485	4.13681
1783	572947	3.5725
1784	519199	3.7961
1785	471378	3.68021
1786	468068	3.34748
1787	450297	3.7064
1788	697453	3.34985
1789	623496	4.02604
1790	730463	3.75671
1791	512351	3.85813
1792	543927	3.71476
1793	670340	3.37159
1794	819987	3.37366
1795	601371	4.43676
1796	501010	4.16131
1797	704102	4.52033
1798	601540	4.72972
1799	586418	4.10992
1800	707203	3.29327
1801	468744	4.2316
1802	594272	3.08203
1803	698763	3.68208
1804	796253	3.56841
1805	754054	4.28532
1806	607305	2.31664
1807	577694	3.20619
1808	615894	3.38105
1809	655451	4.41
1810	625011	3.75305
1811	464436	3.08395
1812	595703	3.84807
1813	488944	4.43913
1814	650727	3.15317
1815	727042	3.33134
1816	570702	3.00143
1817	839414	4.38605
1818	820641	4.50181
1819	690556	3.93145
1820	619429	2.94761
1821	499704	3.82213
1822	584297	3.75171
1823	657607	3.22394
1824	626497	3.10977
1825	632603	2.60995
1826	597989	3.57122
1827	519714	3.06144
1828	690080	3.59683
1829	628029	4.84039
1830	367064	4.33569
1831	640484	2.55601
1832	733126	2.86859
1833	559329	3.1334
1834	532445	3.35025
1835	550249	3.45523
1836	683074	3.19641
1837	434096	3.38276
1838	735444	3.57814
1839	652003	2.76203
1840	555004	2.57184
1841	503524	2.98828
1842	681779	3.94241
1843	754321	4.76084
1844	533887	4.33704
1845	767642	3.31423
1846	682344	2.85454
1847	606849	3.70984
1848	422265	3.65994
1849	634689	3.8076
1850	549360	3.60396
1851	681598	4.71719
1852	693945	3.61097
1853	621643	3.4187
1854	414331	4.22118
1855	513669	4.12087
1856	745489	4.50251
1857	608737	3.7581
1858	618487	3.33591
1859	724883	3.38291
1860	644892	3.74319
1861	621955	3.83897
1862	664704	3.38241
1863	402239	3.90598
1864	658239	2.00638
1865	407590	3.67305
1866	589508	3.70208
1867	477728	4.41098
1868	597782	3.61776
1869	556386	4.12915
1870	599201	3.67937
1871	413701	3.94954
1872	355375	3.4014
1873	524045	3.32244
1874	630713	3.61588
1875	473680	3.87804
1876	495340	4.76839
1877	790640	3.28117
1878	404542	3.90258
1879	531090	3.07993
1880	740147	3.65908
1881	364543	3.21267
1882	524006	3.02205
1883	448823	3.80647
1884	554767	4.30954
1885	691607	3.30521
1886	550921	3.59955
1887	512940	4.33794
1888	583836	3.94065
1889	650267	3.91435
1890	556711	4.85836
1891	572789	3.42404
1892	534621	3.8201
1893	500170	2.90545
1894	428782	2.84074
1895	810969	3.26063
1896	518941	3.53682
1897	427808	3.82141
1898	804779	2.80332
1899	718430	3.83712
1900	700509	3.24713
1901	541365	3.28771
1902	497599	4.29966
1903	574178	3.3859
1904	497461	3.90341
1905	723281	3.81076
1906	545899	4.02887
1907	567207	3.26769
1908	342543	3.69569
1909	613722	3.71814
1910	722313	4.40607
1911	526765	3.80286
1912	619428	3.91571
1913	732031	4.24969
1914	602075	3.64854
1915	436731	3.94391
1916	432476	4.05692
1917	585248	3.57626
1918	693557	3.67173
1919	511071	3.53302
1920	503842	2.85987
1921	728270	3.08777
1922	504111	3.81542
1923	667960	3.69947
1924	679093	3.57551
1925	462973	3.77118
1926	589851	4.22917
1927	831781	4.1301
1928	613632	4.01887
1929	403410	4.05571
1930	647868	3.48002
1931	644544	2.93697
1932	617393	3.98894
1933	606131	3.78161
1934	577766	3.27684
1935	664328	3.66565
1936	614100	3.66168
1937	563095	3.96465
1938	628045	4.05998
1939	611965	2.99872
1940	498321	3.26068
1941	474123	3.3014
1942	586010	3.84183
1943	605845	4.32446
1944	531585	3.10444
1945	562418	3.71874
1946	576609	5.37322
1947	514284	3.72961
1948	489810	3.10106
1949	733048	3.84169
1950	579570	3.45323
1951	464976	1.96676
1952	691180	4.22547
1953	454307	3.56391
1954	554577	2.92737
1955	566853	3.6737
1956	561990	3.51674
1957	667583	2.93589
1958	700393	3.99755
1959	651268	3.6605
1960	746707	4.07422
1961	744547	3.94704
1962	619228	3.66096
1963	589268	3.95713
1964	746601	3.47085
1965	666781	2.7516
1966	439371	3.75957
1967	678611	3.59573
1968	591732	3.83452
1969	555914	3.51084
1970	500851	4.13461
1971	516027	3.49628
1972	579704	3.73607
1973	663424	4.69465
1974	547382	3.1702
1975	611439	3.98799
1976	490548	3.37348
1977	566239	2.90844
1978	631523	3.57337
1979	384635	3.9141
1980	695534	3.44898
1981	761412	4.22277
1982	298061	4.27617
1983	531617	3.61495
1984	552749	3.94806
1985	789266	2.55533
1986	782363	2.99037
1987	571890	4.03882
1988	611060	3.18286
1989	428294	3.70046
1990	654630	4.37104
1991	786828	3.61006
1992	384235	3.56933
1993	590115	3.60015
1994	673492	4.01434
1995	363253	3.82054
1996	531704	4.37529
1997	560356	3.8867
1998	752237	3.70341
1999	497407	3.87714
[truncated: 8,001 more rows]

## Sheet: CEAC
WTP	CE
0	0
50000	0.0004
95749	0.0357
100000	0.0473
150000	0.4009
160300	0.5044
200000	0.8175
250000	0.9642
287247	0.9914
300000	0.9947
350000	0.9993
400000	0.9996

## Sheet: Sensitivity Analysis
			ΔCost	ΔQALY	NMB
			516478	3.62732	525457	1
ΔCost	587091		473900	3.13263	425937	1	ΔCost	587829	587829	587829	587829	587829	705395	470263	587091	506565	587076
ΔQALY	3.67		648820	2.8564	171672	1	ΔQALY	3.67	3.76	3.62	3.6	3.74	3.67	3.67	3.67	3.17	3.67
WTP	287247		704410	3.23696	225397	1	WTP	287247	287247	287247	287247	287247	287247	287247	287247	287247	287247
CE	0.9821		570505	3.36613	396407	1	CE	0.9914	0.9881	0.9807	0.9806	0.9856	0.9322	0.9981	0.9873	0.9849	0.9847
			593361	3.93353	536533	1
			453235	4.1301	733124	1
			249185	3.9722	891817	1
			801057	2.42524	-104414	0
			835187	3.55551	186123	1
			390145	3.81221	704902	1
			418447	3.62837	623791	1
			625440	3.74666	450777	1
			745348	3.26266	191840	1
			980878	2.9427	-135597	0
			591766	3.63562	452556	1
			763289	3.76076	316977	1
			625977	3.71212	440319	1
			648307	3.45059	342864	1
			455159	3.36171	510483	1
			469526	4.43646	804833	1
			678225	4.07279	491673	1
			508557	3.07774	375514	1
			397363	3.45557	595239	1
			714672	4.22438	498770	1
			562348	4.66991	779071	1
			743635	3.68526	314946	1
			702142	3.49646	302206	1
			594072	3.4897	408335	1
			538903	3.59235	492989	1
			728455	3.82629	370634	1
			606297	4.18113	594720	1
			583914	2.95723	265542	1
			624422	3.26271	312780	1
			854234	4.49049	435644	1
			714346	4.06824	454245	1
			681331	4.42192	588851	1
			259755	3.97665	882527	1
			510084	2.48466	203629	1
			600095	2.75469	191181	1
			522015	3.21759	402227	1
			589730	4.13052	596750	1
			737043	3.71678	330591	1
			671887	2.71429	107786	1
			376183	3.54036	640775	1
			716342	3.38274	255340	1
			722167	3.39585	253280	1
			607181	4.49766	684759	1
			707420	3.22397	218655	1
			459951	3.52208	551754	1
			599784	3.7134	466880	1
			610818	4.29859	623940	1
			502919	3.18467	411869	1
			514590	3.49618	489677	1
			436635	3.55651	584961	1
			517757	4.22356	695446	1
			1.05975e+06	4.42131	210256	1
			467042	4.268	758929	1
			532068	4.20794	676649	1
			715496	3.0601	163510	1
			600536	3.09456	288366	1
			818833	3.17826	94112.6	1
			607857	2.7695	187674	1
			716167	3.51901	294659	1
			773761	4.4633	508308	1
			541275	2.69441	232688	1
			513150	3.40476	464857	1
			418965	3.80249	673288	1
			781079	3.85095	325094	1
			497005	2.94788	349766	1
			701786	3.85347	405110	1
			490526	4.66593	849747	1
			736233	3.75638	342774	1
			804766	4.57231	508616	1
			644939	3.75958	434988	1
			542965	3.49325	460459	1
			501135	4.72278	855471	1
			818261	3.94228	314148	1
			463022	3.52776	550317	1
			582130	3.56113	440796	1
			665045	2.90737	170087	1
			747164	4.68778	599386	1
			433863	3.45143	557549	1
			449314	3.76954	633476	1
			567770	3.42541	416169	1
			512664	3.42518	471208	1
			545441	3.47731	453406	1
			494363	3.11073	399184	1
			751609	4.49625	539925	1
			657997	4.2352	558551	1
			571020	3.05001	305087	1
			279499	3.69263	781198	1
			753420	3.08494	132719	1
			467329	3.90451	654231	1
			870831	4.04018	289699	1
			616087	2.29919	44348.9	1
			470067	3.73568	602996	1
			573119	3.71075	492781	1
			935989	3.47741	62887	1
			621067	3.90952	501930	1
			607606	2.68463	163546	1
			591820	4.21683	619453	1
			666612	3.37803	303716	1
			460945	3.18291	453335	1
			670435	3.88951	446815	1
			395893	4.20278	811343	1
			468779	2.99746	392233	1
			503605	4.34287	743873	1
			546567	3.95263	588813	1
			573979	3.81302	521299	1
			423253	2.97612	431628	1
			642082	3.05081	234254	1
			674217	4.14716	517043	1
			452784	3.66112	598861	1
			599337	3.85726	508650	1
			690919	4.19733	514752	1
			617145	4.49188	673135	1
			680779	4.01211	471687	1
			643315	4.30802	594149	1
			672790	3.56192	350359	1
			653264	3.89264	464884	1
			677932	3.58566	352037	1
			409347	4.03161	748722	1
			483093	3.67925	573759	1
			611168	3.56455	412738	1
			584191	2.51035	136900	1
			635727	2.96913	217147	1
			405289	3.17084	505525	1
			522487	4.11504	659546	1
			404700	3.7068	660068	1
			307740	3.47197	689574	1
			649657	2.79965	154534	1
			642861	2.27466	10528.1	1
			541290	4.2978	693241	1
			568838	3.60719	467316	1
			389026	3.21307	533919	1
			545428	3.28638	398575	1
			863870	3.1554	42507.9	1
			600960	4.32766	642146	1
			586878	3.19098	329720	1
			922784	3.9101	200381	1
			517907	3.1186	377902	1
			602431	4.08213	570150	1
			517510	3.38376	454465	1
			467447	3.66001	583880	1
			748513	3.72798	322340	1
			484753	3.7308	586908	1
			441672	3.16471	467380	1
			553334	3.59684	479849	1
			633619	3.85072	472490	1
			619714	5.01907	821998	1
			490126	3.64745	557592	1
			746559	3.93977	385127	1
			790498	3.68043	266695	1
			466698	5.23754	1.03777e+06	1
			247199	2.17792	378402	1
			441904	3.92039	684217	1
			820721	4.08351	352255	1
			737260	3.81157	357601	1
			541381	3.86116	567726	1
			550043	4.39401	712125	1
			246335	3.92244	880375	1
			507249	3.48862	494847	1
			736850	2.61751	15021.9	1
			643970	3.57483	382888	1
			109208	3.91293	1.01477e+06	1
			342444	3.85979	766269	1
			648638	3.37076	319604	1
			578551	3.20197	341205	1
			409525	3.54917	609963	1
			760725	4.17245	437800	1
			631481	3.82326	466740	1
			683172	4.01771	470902	1
			378757	3.62071	661280	1
			732973	4.19499	472025	1
			606357	3.59672	426790	1
			396368	2.72741	387071	1
			778645	3.35204	184219	1
			651904	4.45931	629019	1
			578334	4.72035	777571	1
			927407	2.98547	-69839.9	0
			459447	3.59439	573031	1
			891851	4.45116	386731	1
			526724	4.23211	688936	1
			541177	3.86524	569102	1
			402692	3.32677	552913	1
			510171	3.3875	462877	1
			698420	3.54158	318888	1
			681639	3.55183	338614	1
			449507	3.61364	588500	1
			782131	3.11702	113224	1
			494313	4.0318	663809	1
			643133	3.7631	437805	1
			570244	3.75077	507155	1
			704852	3.6593	346271	1
			809237	3.28984	135759	1
			708020	4.65075	627893	1
			625363	3.93975	506317	1
			594989	3.85624	512705	1
			369158	4.13066	817363	1
			676943	3.22313	248890	1
			536146	3.80845	557821	1
			684570	3.87163	427544	1
			529541	2.97862	326058	1
			567988	3.30397	381069	1
			618962	4.16552	577571	1
			566713	3.72657	503732	1
			540517	3.55568	480840	1
			629324	3.50027	376117	1
			886078	3.42452	97606.1	1
			607905	3.54981	411766	1
			642666	2.90427	191578	1
			503546	3.51005	504705	1
			705353	4.32917	538187	1
			390790	4.16434	805404	1
			644027	4.10327	534625	1
			332707	3.61886	706799	1
			654010	4.33344	590758	1
			531455	2.31989	134927	1
			439749	3.17215	471442	1
			527775	3.29183	417794	1
			576539	3.86799	534530	1
			693208	3.71243	373175	1
			715928	2.92305	123709	1
			622536	3.73071	449100	1
			826063	3.44865	164551	1
			809523	3.81165	285363	1
			379704	3.51793	630812	1
			500718	4.19346	703841	1
			501282	4.27619	727042	1
			844241	4.1404	345078	1
			543614	3.51704	466647	1
			767614	3.93282	362076	1
			541362	3.54095	475766	1
			568479	3.93184	560930	1
			422533	3.54816	596665	1
			517066	3.58892	513842	1
			599766	3.70291	463883	1
			695673	4.2058	512432	1
			582272	3.26738	356272	1
			654948	3.50709	352452	1
			385864	3.14124	516447	1
			596505	3.30802	353713	1
			521930	3.86953	589580	1
			396762	3.3363	561580	1
			664554	3.45959	329202	1
			571856	3.18223	342231	1
			693653	4.42669	577900	1
			767905	3.77238	315700	1
			506407	3.61232	531220	1
			553954	3.98942	591996	1
			466408	4.37298	789718	1
			329229	3.44387	660011	1
			692742	3.40158	284352	1
			486757	3.37145	481683	1
			315541	3.6285	726736	1
			353472	4.44255	922636	1
			784456	4.29278	448633	1
			534648	3.90168	586098	1
			561440	2.99243	298127	1
			557258	2.95456	291431	1
			515491	3.37025	452604	1
			443762	3.96105	694038	1
			483055	3.65659	567289	1
			527183	3.61075	509992	1
			693935	4.01706	459954	1
			691099	4.54045	613132	1
			770686	4.35855	481295	1
			931750	3.61091	105474	1
			250082	4.02212	905260	1
			858620	3.2176	65625.5	1
			717179	3.23684	212594	1
			691456	4.55698	617524	1
			646613	4.57685	668073	1
			577805	3.87899	536424	1
			646737	3.23832	283459	1
			729470	3.57733	298106	1
			570018	4.64903	765401	1
			530413	4.19203	673734	1
			509856	3.83774	592524	1
			538511	3.46426	456586	1
			588372	3.78674	499356	1
			592274	4.80861	788985	1
			714654	3.20472	205894	1
			548529	4.0067	602385	1
			464705	3.61822	574617	1
			705750	4.15619	488104	1
			708983	3.83268	391942	1
			845075	3.78291	241555	1
			608429	3.53071	405756	1
			587586	4.1039	591246	1
			605538	3.89821	514210	1
			556914	4.2247	656618	1
			316725	3.27399	623718	1
			625892	3.62125	414302	1
			686632	4.25672	536099	1
			795853	3.16345	112838	1
			790044	4.03146	367981	1
			592401	3.75495	486198	1
			505076	3.95441	630817	1
			679428	3.62349	361407	1
			523477	4.99692	911874	1
			368254	3.56431	655583	1
			639827	3.46594	355754	1
			330565	3.62335	710232	1
			516046	3.98244	627897	1
			592184	4.14592	598720	1
			539184	3.63708	505555	1
			677349	2.71031	101179	1
			306991	3.75213	770797	1
			667222	3.54344	350622	1
			497544	2.96939	355404	1
			625278	4.26208	598990	1
			333447	4.41066	933503	1
			499980	2.84514	317277	1
			621582	3.88402	494091	1
			699610	3.03237	171428	1
			479344	3.41759	502349	1
			491501	4.16518	704935	1
			538551	4.9593	885994	1
			682580	3.93273	447085	1
			831951	3.94924	302457	1
			476153	2.72119	305500	1
			890558	3.32109	63414.5	1
			481576	2.48816	233139	1
			606145	3.95164	528952	1
			387473	4.1126	793861	1
			726608	2.03195	-142936	0
			565045	4.969	862285	1
			492136	4.27705	736434	1
			652455	4.33445	592603	1
			581348	5.37416	962363	1
			595412	4.75782	771259	1
			740067	3.53708	275949	1
			526467	4.2403	691547	1
			541366	3.24665	391225	1
			713557	3.8897	403749	1
			380288	3.80711	713294	1
			564357	3.78482	522820	1
			564156	4.40753	701894	1
			375656	3.65686	674766	1
			594234	3.65576	455872	1
			558257	3.60266	476595	1
			456043	3.67703	600174	1
			476195	3.68748	583022	1
			534106	2.34004	138065	1
			777028	4.70241	573724	1
			795561	5.18007	692399	1
			726835	4.45271	552194	1
			536558	4.17852	663708	1
			425699	4.34399	822098	1
			632300	3.7746	451942	1
			395640	3.50416	610919	1
			552735	3.76336	528279	1
			652574	3.64577	394662	1
			518317	3.47964	481200	1
			650346	3.099	239833	1
			452321	3.16475	456745	1
			633639	2.97259	220229	1
			489769	3.26809	448979	1
			412556	3.43909	575313	1
			475174	4.00296	674665	1
			643584	3.45622	349205	1
			781228	3.65757	269399	1
			504539	3.68273	553313	1
			730467	4.39028	530627	1
			654352	3.46393	340650	1
			540006	3.13922	361726	1
			694864	3.54229	322649	1
			575462	3.20626	345528	1
			844683	3.55608	176790	1
			196338	4.52574	1.10367e+06	1
			418542	3.15677	488231	1
			473517	3.95917	663742	1
			565045	3.3811	406167	1
			245845	3.9533	889729	1
			653825	4.17979	546809	1
			790161	3.64822	257779	1
			563586	3.60889	473058	1
			688215	4.38787	572186	1
			288447	3.76754	793767	1
			742836	3.53825	273517	1
			731016	3.43517	255725	1
			556681	2.80269	248382	1
			938806	3.71504	128327	1
			788143	3.68855	271382	1
			680322	4.0284	476825	1
			656253	3.68456	402124	1
			264684	2.47657	446703	1
			269928	3.49703	734584	1
			499410	3.34209	460596	1
			537060	3.82457	561536	1
			704029	3.81631	392196	1
			626420	2.76629	168189	1
			530409	3.7903	558344	1
			530916	4.49606	760563	1
			853935	4.07492	316574	1
			616363	3.24757	316492	1
			253479	3.25722	682148	1
			222214	4.02674	934456	1
			430339	3.73162	641557	1
			740659	3.47252	256813	1
			462812	4.10903	717494	1
			492356	4.42625	779071	1
			356392	3.32329	598213	1
			473028	4.54437	832328	1
			977988	4.54228	326769	1
			578094	4.13066	608426	1
			644150	4.73606	716268	1
			588300	3.03449	283347	1
			623903	4.10782	556056	1
			765876	3.03009	104508	1
			426483	3.19524	491341	1
			803881	3.47817	195212	1
			550391	3.94787	583623	1
			883301	3.71501	183824	1
			575460	2.81002	231710	1
			731940	3.61041	305138	1
			660529	3.64023	385117	1
			532602	4.26419	692273	1
			616737	3.3719	351831	1
			504964	3.67115	549564	1
			407886	3.85728	700108	1
			380719	3.45751	612440	1
			707497	3.53724	308565	1
			534397	2.55348	199082	1
			658267	4.01471	494948	1
			549708	3.63184	493528	1
			358754	2.90986	477095	1
			459133	3.97394	682370	1
			594837	3.4595	398893	1
			803459	3.35335	159782	1
			539722	3.7418	535099	1
			453769	3.90397	667635	1
			657134	3.38163	314228	1
			576464	3.76113	503908	1
			803676	3.49272	199599	1
			700809	3.80202	391309	1
			432279	3.83408	669050	1
			1.0151e+06	3.28425	-71712	0
			768475	3.26319	168867	1
			685280	2.9932	174507	1
			917501	3.05671	-39470.1	0
			544699	3.31156	406537	1
			891520	2.32536	-223568	0
			769548	3.56344	254040	1
			714430	3.77681	370448	1
			704721	2.32702	-36292.1	0
			337343	3.6944	723862	1
			780607	3.09013	107023	1
			583515	4.17734	616413	1
			497695	3.62881	544670	1
			469222	4.29365	764117	1
			618398	3.98784	527096	1
			778278	4.28015	451184	1
			504405	3.60274	530471	1
			571146	4.00632	579656	1
			458963	2.82053	351225	1
			696178	3.34507	264685	1
			563923	2.28714	93051.7	1
			549502	3.12808	349030	1
			505141	2.63373	251391	1
			356309	4.90161	1.05166e+06	1
			599213	4.12257	584983	1
			477126	4.26562	748161	1
			875616	3.28454	67857.8	1
			675724	4.53227	626156	1
			726835	3.06242	152835	1
			553243	2.27901	101396	1
			529824	4.19932	676419	1
			501151	2.40296	189093	1
			655810	2.81783	153603	1
			629816	4.58847	688207	1
			609164	3.37806	361175	1
			746887	2.91797	91291.4	1
			897367	3.29752	49836.1	1
			804315	3.53976	212471	1
			312126	3.66793	741475	1
			636702	4.29548	597161	1
			728080	4.46948	555765	1
			563410	3.1069	329036	1
			730753	4.60079	590811	1
			482389	3.01746	384367	1
			656709	3.45017	334341	1
			260567	3.39683	715162	1
			330321	4.31781	909956	1
			504290	3.6894	555479	1
			700177	4.05527	464688	1
			368085	3.69329	692802	1
			595234	3.17732	317443	1
			575069	3.70323	488673	1
			419652	3.43091	565866	1
			620741	2.79059	180846	1
			721367	4.41599	547113	1
			457189	3.27081	482341	1
			455206	4.1838	746578	1
			238264	4.14519	952428	1
			605986	3.68292	451920	1
			660579	4.12893	525443	1
			588018	3.80845	505949	1
			605762	3.23424	323263	1
			538202	3.67746	518139	1
			401437	3.81477	694344	1
			732089	2.95511	116757	1
			649237	4.80423	730765	1
			570395	2.91852	267940	1
			890523	4.3562	360782	1
			870909	3.52478	141575	1
			503937	2.73385	281352	1
			541760	3.00028	320060	1
			615841	2.95419	232740	1
			521715	3.38127	449543	1
			362798	4.41397	905100	1
			390205	3.45224	601440	1
			715525	4.40909	550973	1
			684052	4.11272	497315	1
			805172	3.95627	331255	1
			599692	4.23856	617822	1
			316685	3.50409	689856	1
			515657	3.04633	359392	1
			555725	3.49449	448057	1
			720199	3.63292	323348	1
			595918	4.03055	561845	1
			773954	3.34813	187785	1
			638332	3.12538	259423	1
			709371	4.27069	517371	1
			294878	3.51995	716216	1
			529469	2.73041	254833	1
			584924	3.2474	347881	1
			740128	3.95021	394557	1
			829236	3.38604	143394	1
			725943	3.69878	336520	1
			639294	4.19657	566159	1
			784189	3.98484	360444	1
			684729	4.33913	561674	1
			535404	3.5141	474011	1
			894920	4.36378	358565	1
			353296	3.24415	578577	1
			641962	3.77052	441108	1
			665427	3.83069	434927	1
			656507	3.58311	372729	1
			621634	4.28153	608222	1
			683359	4.10556	495951	1
			701510	3.04506	173174	1
			635484	3.17284	275905	1
			512243	3.68512	546298	1
			313680	3.28451	629787	1
			549630	4.50791	745254	1
			224215	4.10168	953981	1
			762084	3.63998	283491	1
			587189	4.39556	675422	1
			435403	3.70191	627961	1
			499311	3.61876	540168	1
			407845	2.95708	441568	1
			455687	3.23418	473321	1
			260185	4.2023	946913	1
			416479	3.75676	662639	1
			588947	3.60503	446588	1
			931493	3.18972	-15255.8	0
			634292	2.61483	116810	1
			294103	3.293	651802	1
			647418	3.99709	500734	1
			645757	4.27853	583237	1
			342766	4.21128	866911	1
			525969	3.71736	541832	1
			477980	4.03895	682197	1
			787866	3.85889	320590	1
			708565	4.25422	513447	1
			415617	2.98183	440904	1
			453685	3.18395	460896	1
			680495	4.10921	499863	1
			626943	2.78342	172588	1
			604359	3.89624	514824	1
			239971	3.50821	767751	1
			523421	3.22719	403578	1
			434074	3.42815	550651	1
			541823	4.23252	673955	1
			650839	3.97712	491579	1
			487585	3.22426	438573	1
			695150	4.25	525648	1
			673022	3.56408	350751	1
			366362	3.5781	661438	1
			761333	4.26924	464993	1
			667126	3.62677	374652	1
			829602	3.3862	143072	1
			732681	4.20973	476552	1
			766716	3.72546	303412	1
			561983	3.03569	310010	1
			761845	3.42551	222121	1
			750392	3.25755	185329	1
			467932	4.236	748845	1
			575233	4.08067	596927	1
			530865	3.8335	570296	1
			422678	2.20479	210642	1
			376299	3.27608	564745	1
			936738	4.46112	344705	1
			428962	2.91094	407196	1
			346338	3.68204	711316	1
			712487	2.78896	88634.5	1
			797972	3.65711	252522	1
			612784	3.76813	469600	1
			556559	3.04758	318851	1
			414674	3.57958	613550	1
			363630	3.93659	767145	1
			533087	2.1603	87453.5	1
			491381	3.60372	543778	1
			634195	3.41162	345783	1
			669545	4.16874	527914	1
			669524	3.07792	214598	1
			325138	3.93181	804264	1
			591401	3.27682	349856	1
			788986	3.59174	242732	1
			570963	2.65337	191209	1
			606035	3.93694	524839	1
			755254	4.79863	623138	1
			829735	3.06776	51469.5	1
			527336	4.50964	768043	1
			728629	4.03718	431040	1
			569786	3.8404	533358	1
			366222	4.61503	959430	1
			580354	3.03243	290701	1
			956781	3.63919	88565	1
			542746	3.37548	426852	1
			534419	3.02949	335793	1
			317691	4.14932	874188	1
			433261	3.55333	587424	1
			487284	4.27261	740012	1
			284436	2.3344	386113	1
			605612	3.35183	357193	1
			688946	4.48506	599373	1
			609069	3.16036	298736	1
			742094	3.72255	327196	1
			344713	3.97009	795684	1
			567333	3.03231	303689	1
			650842	3.72083	417954	1
			616353	4.0465	545993	1
			775082	4.56551	536348	1
			581462	4.20892	627537	1
			731778	2.37405	-49838.1	0
			601587	3.94998	533033	1
			602787	3.37591	366932	1
			465970	4.26346	758696	1
			600991	3.6235	439850	1
			646331	4.21093	563246	1
			701374	3.1084	191505	1
			388776	3.28786	555651	1
			657590	2.78078	141180	1
			802680	3.23963	127895	1
			417293	4.31718	822804	1
			542355	3.46605	453258	1
			516405	4.6895	830641	1
			381478	3.01501	484576	1
			895529	3.54041	121443	1
			605857	2.5674	131621	1
			574440	3.273	365718	1
			668200	3.67285	386814	1
			471807	3.38951	501818	1
			482999	4.12818	702807	1
			602813	3.98854	542883	1
			615815	3.58824	414895	1
			707070	4.73101	651898	1
			530808	4.43091	741958	1
			612720	3.87923	501577	1
			298632	4.91636	1.11358e+06	1
			748848	2.87535	77087.4	1
			548983	4.16073	646174	1
			308352	3.31397	643576	1
			433008	3.21443	490327	1
			731961	3.71292	334566	1
			541193	2.90623	293612	1
			728113	3.31241	223367	1
			688962	3.34856	272903	1
			374216	4.34944	875149	1
			393537	3.28684	550599	1
			875098	3.65691	175339	1
			540277	3.57541	486747	1
			629848	2.93993	214637	1
			549837	3.04626	325193	1
			519291	3.65671	531088	1
			683993	3.39471	291127	1
			743747	4.01534	409647	1
			754806	2.93436	88080.1	1
			726320	4.06939	442601	1
			632398	4.28909	599630	1
			503074	3.26897	435929	1
			99162.8	3.84079	1.00409e+06	1
			624943	3.24163	306206	1
			328276	4.2169	883017	1
			706415	3.22472	219875	1
			677566	3.95641	458901	1
			814900	3.71269	251559	1
			348187	4.16286	847581	1
			758148	4.24292	460617	1
			654597	4.3941	607595	1
			645116	3.06419	235063	1
			607842	3.12898	290948	1
			695104	3.46467	300111	1
			564885	4.69477	783674	1
			415102	3.13579	485643	1
			712518	3.98855	433182	1
			623673	3.61303	414158	1
			654818	3.57383	371755	1
			425790	3.35799	538783	1
			256999	3.51022	751302	1
			576748	4.17751	623228	1
			337478	3.33993	621908	1
			814519	2.26096	-165066	0
			453154	3.09047	434574	1
			568324	4.09871	609017	1
			555806	4.5602	754097	1
			621385	4.76088	746163	1
			500540	3.45606	492201	1
			521784	3.08566	364563	1
			750746	3.60077	283565	1
			716207	3.96586	422975	1
			785366	3.13479	115092	1
			714070	3.76275	366770	1
			598971	3.66245	453057	1
			736294	2.83329	77560.8	1
			644120	3.40853	334971	1
			687504	3.70221	375945	1
			572633	3.84169	530882	1
			620416	2.86103	201405	1
			768831	4.36916	486198	1
			700125	3.30424	249009	1
			357099	3.40789	621808	1
			762774	3.48727	238934	1
			679947	4.54088	624408	1
			622409	3.2957	324272	1
			472740	3.46061	521310	1
			611011	4.4366	663390	1
			495961	3.31394	455958	1
			543970	3.0148	322023	1
			602087	2.48186	110820	1
			611392	4.32681	631470	1
			616036	3.32464	338957	1
			508266	3.56225	514980	1
			553749	4.47641	732085	1
			778537	3.4426	210338	1
			567091	3.01299	298382	1
			584534	4.34961	664879	1
			616532	3.78674	471197	1
			377377	3.36293	588613	1
			780386	3.88743	336268	1
			601099	3.54665	417665	1
			484998	3.20235	434868	1
			771930	3.65257	277261	1
			804066	4.11343	377504	1
			444068	4.04511	717878	1
			646717	3.4693	349829	1
			680831	3.36721	286388	1
			586449	3.68215	471239	1
			321117	4.29799	913468	1
			366743	3.29932	580977	1
			682713	4.15878	511883	1
			527283	3.39394	447615	1
			721556	3.11306	172662	1
			713540	3.38463	258685	1
			809162	3.91562	315590	1
			549819	4.75424	815822	1
			643509	2.86348	179018	1
			503712	3.78669	584002	1
			588775	4.89804	818172	1
			664084	4.18446	537889	1
			687825	3.22681	239066	1
			652489	3.05729	225707	1
			492103	2.99206	367358	1
			624935	3.2681	313816	1
			548094	3.84986	557767	1
			675773	3.70366	388092	1
			723095	4.28163	506789	1
			426040	3.36371	540174	1
			283270	3.36998	684746	1
			540938	2.86737	282706	1
			637438	3.83243	463416	1
			761614	2.77752	36219.5	1
			332514	3.69346	728420	1
			766473	3.23976	164139	1
			416874	4.30472	819645	1
			514919	4.27905	714225	1
			613935	3.86529	496357	1
			676512	4.16686	520407	1
			314522	3.52215	697204	1
			598025	3.54089	419086	1
			504370	3.86736	606518	1
			482160	3.2865	461878	1
			486811	3.32858	469314	1
			518227	3.56653	506247	1
			534733	3.58103	493907	1
			837588	4.036	321741	1
			523152	4.30812	714342	1
			423340	3.39772	552644	1
			673834	2.0944	-72222.6	0
			807196	3.20785	114250	1
			649444	4.47703	636570	1
			642370	3.4547	349982	1
			454083	4.39195	807491	1
			753275	3.71677	314355	1
			467031	4.00393	683086	1
			416057	3.43496	570625	1
			743674	2.9647	107927	1
			558675	3.38255	412954	1
			668753	3.87324	443823	1
			615538	3.96491	523371	1
			579035	3.63403	464831	1
			675377	3.665	377384	1
			624365	4.01462	528823	1
			227866	3.76959	854938	1
			594794	3.75598	484099	1
			438971	3.73458	633775	1
			632133	2.92908	209237	1
			656383	3.83882	446306	1
			695109	3.21621	228738	1
			674613	3.74917	402326	1
			600800	4.27619	627524	1
			554771	3.21824	369658	1
			550316	4.10262	628148	1
			573252	3.24202	358008	1
			198375	3.78514	888895	1
			774987	2.34647	-100970	0
			383637	3.09984	506783	1
			592657	3.66315	459573	1
			378865	3.37614	590921	1
			572383	4.30455	664085	1
			552775	4.61906	774036	1
			861553	3.73327	210819	1
			559920	2.82477	251487	1
			442154	5.20652	1.0534e+06	1
			635328	3.12068	261078	1
			349607	3.35726	614755	1
			580692	3.27744	360742	1
			626187	2.82729	185943	1
			602787	3.06669	278110	1
			708314	3.41008	271222	1
			693799	2.502	24893.3	1
			599370	4.7244	757698	1
			782130	4.14892	409636	1
			424200	3.9631	714189	1
			485716	3.56103	537179	1
			537908	3.34961	424257	1
			640943	3.18839	274913	1
			601034	4.32573	641520	1
			569189	3.63612	475274	1
			575566	3.87847	538512	1
			702569	3.52898	311119	1
			626628	3.62258	413947	1
			632771	2.64466	126899	1
			564458	3.91037	558783	1
			591868	2.89769	240485	1
			673414	3.74121	401237	1
			777819	4.23709	439272	1
			409751	3.70163	653531	1
			384867	3.82339	713391	1
			530062	3.38137	441227	1
			537731	3.70832	527473	1
			392591	3.88396	723064	1
			511989	3.05885	366657	1
			743646	3.25025	189979	1
			399445	2.39947	289797	1
			498227	2.85383	321528	1
			430507	3.13357	469602	1
			403666	3.01948	463670	1
			651305	3.22431	274869	1
			638994	4.29821	595655	1
			340429	3.26657	597882	1
			436426	4.70262	914388	1
			370203	2.87601	455921	1
			624691	3.5501	395066	1
			667236	3.35746	297184	1
			866666	4.33624	378905	1
			673713	4.73317	685876	1
			542900	3.67723	513374	1
			807083	4.29877	427726	1
			668241	4.51449	628534	1
			665189	3.57687	362258	1
			540733	4.09582	635780	1
			707921	2.46661	604.708	1
			408486	3.59909	625343	1
			603905	4.66065	734852	1
			706930	3.64098	338930	1
			763659	3.29894	183953	1
			743491	4.72314	613216	1
			559632	3.87197	552579	1
			555800	3.70861	509488	1
			532946	4.32371	709027	1
			657982	4.10097	520009	1
			748165	3.33542	209923	1
			924689	3.13327	-24665.9	0
			793476	3.5383	222891	1
			605737	3.55107	414298	1
			366446	4.32489	875866	1
			628401	3.40025	348311	1
			521727	4.80104	857359	1
			521429	2.602	225987	1
			632541	4.24314	586288	1
			535364	2.95687	313987	1
			580203	4.46484	702309	1
			559284	3.78471	527861	1
			574303	3.52915	439435	1
			589909	3.42387	393587	1
			658199	3.94522	475053	1
			629827	2.88681	199401	1
			474801	3.31736	478100	1
			780797	3.52293	231155	1
			698896	3.17783	213927	1
			896702	3.11832	-973.992	0
			478791	3.41769	502932	1
			568754	3.47028	428074	1
			395231	3.2561	540074	1
			712368	4.35013	537195	1
			384236	3.17761	528522	1
			565785	4.44933	712272	1
			426538	4.48035	860428	1
			622258	3.89059	495303	1
			690476	3.14064	211663	1
			890730	2.80942	-83733.2	0
			671889	3.38564	300625	1
			751155	3.85648	356608	1
			804616	3.23699	125199	1
			810703	4.08128	361633	1
			427114	3.99539	720550	1
			473145	2.90818	362222	1
			569936	3.03925	303080	1
			795661	3.37776	174589	1
			678230	3.32873	277937	1
			904698	2.68742	-132745	0
			494078	3.95705	642571	1
			796203	4.10784	383763	1
			460442	4.37991	797674	1
			669198	3.26947	269947	1
			534440	3.72401	535269	1
			589970	4.39681	673001	1
			328423	4.47277	956368	1
			636820	3.57169	389136	1
			610449	3.43692	376797	1
			825981	4.95566	597517	1
			800506	4.5178	497217	1
			663496	2.83447	150697	1
			510965	2.82297	299925	1
			584004	3.53221	430614	1
			860479	3.84379	243637	1
			675665	4.46048	605594	1
			596759	4.21484	613941	1
			676789	3.81522	419122	1
			674546	4.17973	526070	1
			760969	3.83752	341347	1
			616509	4.24221	602054	1
			505794	4.3092	732011	1
			688386	4.33172	555886	1
			514509	2.35198	161089	1
			624086	3.86011	484720	1
			364515	3.95631	771923	1
			343590	4.14338	846584	1
			573864	3.547	445002	1
			646275	4.21807	565353	1
			519894	3.59577	512980	1
			558577	4.08463	614721	1
			583330	4.24663	636501	1
			593859	4.66826	747086	1
			941809	3.11256	-47735.1	0
			221579	3.80586	871644	1
			837922	3.34281	122291	1
			553977	3.20337	366180	1
			618125	3.22431	308047	1
			583934	3.87125	528073	1
			357968	3.90736	764410	1
			996908	5.37165	546083	1
			767174	4.39709	495878	1
			659220	2.99561	201260	1
			547547	3.61697	491417	1
			430889	4.42349	839744	1
			405378	4.21416	805126	1
			575829	3.16387	332983	1
			408652	4.40514	856713	1
			731444	3.46122	262781	1
			764081	3.42437	219558	1
			644574	3.34965	317603	1
			568421	3.62877	473931	1
			379830	3.25732	555824	1
			632317	3.3309	324474	1
			387045	4.23528	829527	1
			440609	3.6722	614219	1
			693413	3.40429	284460	1
			622769	4.37811	634831	1
			678185	2.91342	158687	1
			636321	4.90082	771426	1
			759530	2.83648	55238.9	1
			797166	3.49596	207038	1
			478303	4.48795	810846	1
			430359	4.97588	998948	1
			655336	3.09395	233392	1
			672443	3.7367	400913	1
			411176	2.8597	410263	1
			561762	3.71807	506243	1
			701019	3.64142	344968	1
			394200	3.63443	649780	1
			483141	4.45188	795649	1
			373891	3.25938	562358	1
			490361	3.78395	596567	1
			469568	3.4046	508395	1
			642782	4.4047	622454	1
			476583	1.87344	61557.6	1
			579134	3.52448	433262	1
			334165	4.14852	857485	1
			605592	4.62134	721873	1
			744432	3.86482	365727	1
			737737	3.63601	306695	1
			442082	4.16813	755201	1
			402125	3.69179	658331	1
			614251	4.09137	560983	1
			766191	2.49186	-50413.3	0
			693426	4.544	611825	1
			665420	3.97384	476053	1
			302737	4.37008	952554	1
			620354	4.94284	799462	1
			467032	3.14697	436927	1
			480506	3.34857	481363	1
			750420	3.29532	196150	1
			627528	4.37601	629469	1
			610567	2.64118	148103	1
			238502	3.01256	626845	1
			557620	3.88739	559021	1
			633544	3.84372	470554	1
			575847	4.04185	585162	1
			483189	2.96558	368663	1
			671398	2.48267	41740.3	1
			588291	4.14795	603195	1
			517133	4.56177	793221	1
			984029	4.29037	248368	1
			495312	3.70257	568240	1
			378562	3.92897	750024	1
			621629	4.21034	587778	1
			562154	4.13268	624945	1
			452981	3.88093	661804	1
			609764	3.02921	260368	1
			461906	3.27486	478786	1
			608005	3.69616	453707	1
			594784	4.58771	723023	1
			737733	3.71426	329177	1
			542473	4.26233	681869	1
			693288	3.11285	200869	1
			568117	2.88373	260226	1
			648762	3.14204	253781	1
			652201	4.12534	532789	1
			614358	4.00035	534729	1
			677616	3.65231	371500	1
			775958	4.00824	375397	1
			876421	3.82682	222820	1
			351886	3.71463	715130	1
			455962	3.19727	462444	1
			361341	3.8199	735914	1
			758993	3.10806	133787	1
			594350	2.92758	246587	1
			598544	4.60339	723765	1
			423167	4.15971	771697	1
			661849	2.83351	152068	1
			827347	3.44724	162863	1
			642845	2.9435	202667	1
			862425	4.19905	343739	1
			472051	4.58376	844619	1
			666768	3.42597	317332	1
			732190	2.60349	15654.9	1
			668980	3.66482	383728	1
			720787	4.13981	468359	1
			754029	3.05403	123231	1
			437442	3.98535	707338	1
			410831	3.52811	602607	1
			408786	3.89408	709776	1
			469129	3.12858	429547	1
			494412	3.31507	457831	1
			489914	3.38432	482223	1
			453607	4.80758	927356	1
			455996	4.13344	731321	1
			557775	4.07548	612894	1
			918607	2.95525	-69719.5	0
			488308	4.08449	684949	1
			273931	2.9242	566035	1
			754876	2.61796	-2874.09	0
			518965	3.1687	391233	1
			365006	3.59798	668504	1
			941595	4.2045	266136	1
			637004	4.27757	591715	1
			465855	3.51999	545253	1
			365266	3.54599	653311	1
			522877	3.63844	522253	1
			470833	3.55468	550237	1
			370056	3.30941	580562	1
			725581	3.80758	368134	1
			750671	3.42474	233075	1
			538233	4.23942	679527	1
			646260	3.62786	395830	1
			588176	3.47876	411086	1
			520373	2.83438	293795	1
			561987	2.83493	252338	1
			716461	3.24808	216541	1
			425917	3.71492	641182	1
			662970	3.51772	347486	1
			591529	3.78493	495682	1
			356555	4.62201	971103	1
			705715	4.15091	486620	1
			844713	3.74965	232364	1
			813271	2.74615	-24448	0
			627027	3.70294	436631	1
			363446	3.25085	570352	1
			528290	3.24459	403708	1
			731992	3.75735	347296	1
			688564	4.25981	535054	1
			553167	3.34077	406458	1
			545525	3.84366	558554	1
			869302	3.6565	181017	1
			668832	4.02039	486014	1
			828771	3.28622	115185	1
			681997	2.99444	178146	1
			644877	3.6505	403718	1
			275938	4.04589	886232	1
			958297	3.68317	99681.7	1
			767700	3.08138	117417	1
			521358	3.45668	471564	1
			662131	2.75096	128074	1
			609224	2.41582	84713.9	1
			382243	3.86628	728336	1
			418753	2.99433	441359	1
			521732	2.95825	328017	1
			518801	4.4664	764160	1
			392934	2.58088	348417	1
			444737	3.18262	469462	1
			675311	3.5311	338987	1
			399598	3.63647	644967	1
			732948	2.69571	41385.8	1
			510202	4.65433	826740	1
			489625	4.80192	889713	1
			854090	2.95187	-6175.35	0
			726774	4.14358	463457	1
			457823	3.85577	649734	1
			730290	4.14543	460473	1
			626579	3.55845	395576	1
			662531	3.721	406315	1
			536590	3.91988	589384	1
			704295	3.57236	321854	1
			778803	4.10027	398987	1
			593820	3.22199	331688	1
			718245	3.02048	149380	1
			531753	4.43379	741839	1
			456367	3.0153	409769	1
			635975	3.58509	393831	1
			705925	2.90405	128256	1
			466389	5.46252	1.1027e+06	1
			743242	3.49067	259443	1
			576852	3.14769	327313	1
			669277	3.86307	440377	1
			666782	3.38831	306499	1
			775950	3.55646	245633	1
			687303	3.42387	296194	1
			820719	3.94027	311113	1
			495552	3.16496	413575	1
			651715	3.24746	281107	1
			590025	2.45592	115431	1
			602945	3.92323	523990	1
			469526	2.92274	370022	1
			404648	4.7902	971324	1
			620917	4.70625	730940	1
			721903	3.24643	210624	1
			661807	3.81933	435285	1
			800052	3.97679	342269	1
			715984	4.28564	515054	1
			430860	3.91722	694349	1
			756242	2.85568	64042.9	1
			478908	4.28195	751071	1
			663130	3.42013	319291	1
			604944	2.56292	131247	1
			679496	2.90584	155197	1
			677102	4.27387	550553	1
			747541	3.61966	292196	1
			649625	3.7704	433412	1
			287524	3.82811	812089	1
			507297	5.26685	1.00559e+06	1
			385829	3.56575	638423	1
			519410	4.31305	719500	1
			522474	3.63011	520263	1
			419029	3.53147	595376	1
			756893	3.9519	378279	1
			732523	3.94764	401424	1
			421855	3.97876	721032	1
			535445	4.10408	643441	1
			585179	4.06064	581228	1
			663605	3.18511	251310	1
			383142	3.58719	647268	1
			464328	3.6338	579471	1
			730885	3.83394	370404	1
			519089	3.35313	444087	1
			674833	3.06035	204243	1
			459284	3.35721	505066	1
			465867	3.18776	449807	1
			898537	2.96136	-47893.6	0
			421887	4.12981	764389	1
			390441	4.17887	809927	1
			701742	3.05225	175007	1
			479732	3.62457	561415	1
			617830	3.15292	287838	1
			501732	3.92862	626754	1
			439003	4.2409	779184	1
			821836	2.4907	-106390	0
			904123	3.24855	29013.8	1
			506580	4.42566	764677	1
			515866	4.46883	767793	1
			683147	3.25675	252345	1
			809310	3.84563	295337	1
			568426	2.26468	82095.8	1
			459423	3.79786	631500	1
			250113	4.1508	942192	1
			661137	3.97437	480490	1
			707257	3.48055	292520	1
			727797	4.5233	571509	1
			534939	3.50505	471875	1
			679221	4.12983	507061	1
			369301	3.82738	730102	1
			764435	4.74406	598282	1
			507256	4.09721	669654	1
			825775	3.6938	235259	1
			692837	2.65654	70245.9	1
			636290	4.35788	615497	1
			796630	4.42189	473544	1
			692235	3.30284	256496	1
			713082	3.62489	328157	1
			697323	4.32374	544660	1
			773148	2.98432	84088.6	1
			608346	2.34081	64046.1	1
			487862	3.98227	656035	1
			857001	4.67215	485061	1
			629952	3.6445	416920	1
			336496	3.81074	758129	1
			564092	3.49063	438581	1
			341128	3.94059	790795	1
			215779	3.04054	657608	1
			661770	3.46514	333582	1
			551164	2.46563	157081	1
			873421	3.39144	100761	1
			496243	3.8326	604661	1
			757510	4.65162	578655	1
			409228	3.03515	462609	1
			760193	5.18368	728805	1
			382836	3.19637	535312	1
			502968	3.59398	529393	1
			685110	3.85987	423626	1
			634476	4.37457	622107	1
			815318	3.40585	163002	1
			440221	3.81777	656420	1
			527289	4.64035	805637	1
			687194	3.58743	343284	1
			787744	3.03029	82696.6	1
			875980	3.55074	143959	1
			349394	4.1244	835326	1
			562077	3.88378	553528	1
			614983	4.70779	737317	1
			708747	3.75698	370433	1
			669908	3.33121	286972	1
			671773	3.15646	234911	1
			463215	3.85922	645335	1
			513663	4.00047	635462	1
			796201	5.097	667897	1
			876716	4.10824	303364	1
			492158	4.52062	806378	1
			789215	3.68682	269812	1
			446491	4.10501	732660	1
			434484	4.54301	870482	1
			330586	4.3344	914459	1
			500623	3.44967	490284	1
			436269	3.96287	702052	1
			659546	3.47591	338898	1
			449695	3.89695	669692	1
			625578	2.54927	106693	1
			593432	3.85135	512857	1
			734659	3.01841	132371	1
			552612	2.55478	181240	1
			545899	3.19689	372398	1
			687911	4.23313	528043	1
			783836	3.53783	232394	1
			591388	4.14939	600513	1
			788564	3.11904	107372	1
			291632	3.89621	827543	1
			614617	2.54106	115295	1
			488287	2.71803	292458	1
			578883	4.10338	599799	1
			726797	2.85796	94143.8	1
			737111	3.01192	128055	1
			694346	3.8832	421091	1
			669829	3.63656	374762	1
			630205	3.37913	340440	1
			623936	3.15795	283175	1
			459944	2.90005	373085	1
			728520	4.09325	447254	1
			543258	4.60062	778257	1
			606171	4.54509	699391	1
			478653	3.7003	584246	1
			738932	3.40033	237804	1
			556314	2.46127	150677	1
			761518	3.62661	280215	1
			598293	3.82241	499684	1
			682368	3.51974	328666	1
			524622	4.27613	703684	1
			381045	2.63762	376605	1
			468459	3.50567	538534	1
			607985	3.25656	327452	1
			319849	3.05986	559087	1
			889589	3.494	114053	1
			386341	3.57864	641613	1
			402853	2.81203	404893	1
			431506	2.72505	351255	1
			551544	4.5384	752097	1
			567480	3.63992	478077	1
			346455	3.26351	590980	1
			486983	3.08622	399525	1
			501149	3.40269	476262	1
			715005	4.65191	621243	1
			699301	3.93411	430760	1
			648464	4.7912	727795	1
			353328	3.26638	584930	1
			583816	3.88756	532873	1
			355532	3.32864	600611	1
			727923	2.71569	52149.8	1
			733313	3.398	242753	1
			585723	4.94177	833785	1
			719270	3.62238	321248	1
			426573	3.7836	660256	1
			644239	2.59713	101780	1
			685044	3.82162	412706	1
			546458	3.85786	561701	1
			589717	4.07864	581862	1
			629775	3.38211	341725	1
			436531	4.58891	881620	1
			320819	4.47028	963256	1
			485590	2.93043	356168	1
			646329	3.65042	402243	1
			487924	3.58865	542905	1
			469535	3.42268	513619	1
			244586	2.96997	608530	1
			491987	3.46127	502252	1
			592277	3.34561	368740	1
			626084	3.8331	474962	1
			594091	3.53687	421863	1
			699829	4.45001	578423	1
			563813	2.78453	236035	1
			606029	3.63572	438321	1
			634715	3.02019	232825	1
			748343	3.55206	271974	1
			511742	3.47506	486459	1
			862940	3.43726	124402	1
			835877	3.79496	254215	1
			777075	4.24732	442955	1
			690615	3.09837	199381	1
			841295	3.38786	131857	1
			544441	3.03845	328343	1
			402682	4.03625	756720	1
			579967	4.79381	797041	1
			776248	4.46348	505872	1
			678597	3.23766	251410	1
			529316	3.16452	379684	1
			617184	2.50271	101713	1
			695412	3.54138	321839	1
			534707	3.4175	446959	1
			805467	4.40734	460529	1
			632606	3.56889	392548	1
			502561	4.02545	653739	1
			658232	3.7757	426327	1
			328923	3.54331	688881	1
			686486	4.08262	486235	1
			520869	4.67904	823172	1
			732716	3.07715	151187	1
			394223	3.76984	688652	1
			600280	4.03568	558958	1
			704515	2.85874	116650	1
			631530	2.93029	210186	1
			385734	3.29088	559562	1
			408662	3.30844	541676	1
			637648	3.99878	510990	1
			391103	3.76985	691774	1
			453558	2.84109	362537	1
			601260	4.32396	640784	1
			725565	3.93335	404278	1
			527055	3.19272	390043	1
			362126	3.11048	531349	1
			502615	4.71954	853059	1
			502363	3.5695	522965	1
			859488	3.90635	262599	1
			655628	3.29586	291098	1
			631541	3.65626	418709	1
			645325	3.39613	330203	1
			569458	3.70362	494395	1
			558611	4.69056	788737	1
			731750	4.041	429016	1
			411896	4.4378	862848	1
			759896	4.1325	427152	1
			567277	4.20555	640754	1
			711744	3.30439	237433	1
			517953	3.35408	445496	1
			697584	3.8955	421388	1
			491426	3.79857	599702	1
			763128	4.41857	506094	1
			499652	3.47717	499154	1
			410048	4.2618	814140	1
			677297	3.3263	278173	1
			315763	3.31507	636482	1
			307786	3.54374	710142	1
			522354	3.41582	458830	1
			988927	5.04746	460942	1
			444860	3.80894	649246	1
			444229	2.7093	334011	1
			802561	4.35513	448438	1
			497119	3.82481	601546	1
			630245	2.57235	108655	1
			530898	3.50584	476143	1
			596558	3.66985	457596	1
			634425	4.3531	615991	1
			713390	4.18459	488620	1
			620109	2.69946	155302	1
			349475	3.69797	712757	1
			550851	4.53724	752458	1
			350784	4.25102	870308	1
			361363	2.92093	477667	1
			615244	4.28537	615715	1
			540394	4.68413	805110	1
			534677	3.83548	567053	1
			571281	4.40524	694111	1
			433902	2.83241	379700	1
			664172	2.77813	133837	1
			336543	3.44576	653241	1
			663573	3.47663	335077	1
			798552	3.41752	183120	1
			450657	3.07906	433793	1
			379919	4.19096	823922	1
			514028	4.03114	643904	1
			748547	3.76234	332175	1
			451121	2.14416	164783	1
			182817	3.49753	821838	1
			631396	4.514	665236	1
			628430	3.65813	422356	1
			327755	2.84007	488047	1
			405983	4.75606	960180	1
			417274	2.2858	239315	1
			463101	3.5543	557861	1
			575036	4.2181	636601	1
			594121	3.64893	454023	1
			603932	3.10524	288039	1
			347842	2.84235	468616	1
			616302	4.18792	586666	1
			527296	3.69692	534634	1
			438089	3.07409	444933	1
			647928	3.00689	215792	1
			746406	3.2114	176058	1
			572744	2.79157	229125	1
			652229	3.28796	292229	1
			681875	3.37589	287838	1
			669520	4.45735	610841	1
			534345	3.84972	571474	1
			522383	3.71592	545006	1
			442727	4.07616	728139	1
			723962	4.14021	465301	1
			674851	3.70795	390248	1
			435154	3.68742	624047	1
			518438	4.54964	788433	1
			567812	3.34141	391997	1
			884109	3.63083	158836	1
			504553	3.99987	644397	1
			584413	3.39043	389478	1
			958763	3.12016	-62507.1	0
			723507	3.73227	348576	1
			588029	3.74218	486902	1
			557083	3.96735	582528	1
			679245	4.12259	504956	1
			710324	4.57429	603628	1
			839029	2.68342	-68225	0
			753186	3.76756	329035	1
			572852	3.78893	515506	1
			720702	3.99472	426768	1
			664709	4.59594	655462	1
			358262	2.99933	503288	1
			588220	4.24204	630294	1
			835518	2.36562	-156000	0
			840396	3.55351	180340	1
			399559	4.32097	841628	1
			492556	3.80349	599985	1
			688615	4.23382	527537	1
			467106	3.7794	618514	1
			489519	3.33603	468746	1
			606690	3.24783	326240	1
			634060	2.97664	220970	1
			605150	4.11178	575947	1
			528481	2.98823	329878	1
			636326	3.47082	360657	1
			560480	3.60617	475381	1
			513827	4.76163	853938	1
			556580	3.53333	458358	1
			796544	3.94755	337379	1
			690285	2.71374	89227.2	1
			627416	3.50959	380704	1
			789306	4.04286	371994	1
			699519	3.82346	398758	1
			641047	3.4269	343319	1
			733163	4.18665	469438	1
			507259	3.15589	399260	1
			862864	4.79296	513899	1
			655322	3.26272	281885	1
			948524	3.85136	157767	1
			665797	3.4912	337038	1
			452396	2.43143	246026	1
			682392	4.42204	587824	1
			279495	2.32233	387587	1
			612308	3.97637	529892	1
			716205	3.6492	332018	1
			864848	3.70162	198431	1
			654073	3.95091	480814	1
			743978	2.80466	61653.1	1
			231602	4.95023	1.19034e+06	1
			599189	3.83006	500983	1
			444138	3.91357	680024	1
			776183	2.97472	78295.9	1
			743034	4.08936	431622	1
			711771	3.08189	173493	1
			436841	3.675	618791	1
			591910	3.91976	534031	1
			653807	4.13704	534545	1
			642778	4.00783	508461	1
			948782	3.7633	132213	1
			511840	3.49516	492134	1
			395636	3.96136	742254	1
			690588	4.87636	710133	1
			651448	3.54489	366812	1
			486543	3.52677	526510	1
			769643	3.84881	335916	1
			754796	4.48157	532522	1
			894994	3.58428	134580	1
			427667	3.76484	653773	1
			357344	4.42774	914511	1
			539064	3.61547	499468	1
			356195	3.32146	597884	1
			559661	3.573	466673	1
			580934	3.30874	369492	1
			700415	2.71814	80361.4	1
			579070	3.22884	348406	1
			836146	3.33007	120407	1
			451849	2.9241	388088	1
			638528	2.96496	213148	1
			633606	4.49806	658447	1
			431770	3.50703	575615	1
			586905	3.33904	372223	1
			418659	4.34648	829853	1
			734350	3.46211	260132	1
			679243	3.76242	401500	1
			463643	3.06633	417152	1
			669681	4.43741	604952	1
			558815	3.8643	551193	1
			681820	2.85092	137097	1
			640600	3.8119	454357	1
			496215	3.58628	533934	1
			416085	3.55832	606032	1
			320551	3.75474	757988	1
			668912	3.05393	208319	1
			652766	3.67548	403005	1
			740896	3.40046	235876	1
			531247	3.7958	559084	1
			326110	3.55822	695979	1
			881675	3.86064	227283	1
			598708	3.72095	470126	1
			655914	3.52491	356605	1
			818603	4.25068	402391	1
			548815	4.39375	713276	1
			621490	2.66023	142653	1
			492438	3.61442	545792	1
			428561	3.43025	556768	1
			759777	4.12416	424876	1
			752978	4.42681	518611	1
			486911	3.97319	654375	1
			574962	3.99416	572347	1
			578608	4.11501	603416	1
			767659	2.8253	43899.5	1
			420118	3.35419	543365	1
			648599	4.05919	517392	1
			358846	3.45085	632401	1
			526743	3.99393	620501	1
			482059	3.87294	630430	1
			686177	3.54823	333041	1
			285100	4.28494	945736	1
			634566	3.36336	331547	1
			657358	3.28249	285528	1
			422816	3.89571	696214	1
			560185	3.69126	500118	1
			609333	3.29713	337757	1
			724132	3.75843	355466	1
			963759	3.79237	125588	1
			676509	3.11162	217294	1
			520594	3.34451	440106	1
			759482	2.87469	66264.5	1
			262244	2.79687	541148	1
			528500	3.29413	417729	1
			497000	3.13055	402241	1
			1.10114e+06	4.09617	75474.5	1
			667931	3.95028	466774	1
			683754	4.13525	504083	1
			553770	3.61019	483246	1
			605786	3.50615	401346	1
			812989	4.03305	345491	1
			539354	3.21038	382819	1
			632168	3.47356	365603	1
			451430	3.85583	656145	1
			717297	4.07613	453560	1
			622328	3.17808	290566	1
			492374	3.40165	484741	1
			733032	3.93879	398373	1
			511658	2.73585	274206	1
			595829	3.1946	321809	1
			710935	4.74923	653267	1
			478679	3.68366	579442	1
			342137	3.66123	709541	1
			564392	2.83813	250851	1
			682833	3.98403	461567	1
			644707	3.66033	406710	1
			550135	3.47364	447657	1
			500663	3.64453	546217	1
			593536	3.33913	365619	1
			600683	3.57402	425943	1
			665044	3.76016	415050	1
			484153	3.60712	551982	1
			396799	3.30181	551634	1
			861363	2.60016	-114475	0
			603411	3.35899	361448	1
			794428	3.24668	138171	1
			447906	2.80139	356786	1
			524256	3.74961	552808	1
			594381	2.81945	215497	1
			547370	4.65945	791043	1
			418892	2.98756	439275	1
			575960	3.35619	388096	1
			646210	3.71912	422096	1
			640638	3.39528	334647	1
			371174	2.90371	462907	1
			370326	3.87347	742316	1
			600601	3.35678	363623	1
			834147	3.714	232688	1
			410910	4.03295	747543	1
			295542	3.9037	825783	1
			459221	4.26335	765412	1
			619305	3.10621	272943	1
			466850	2.33145	202851	1
			641804	3.18794	273922	1
			702136	3.44392	287119	1
			744377	3.20191	175361	1
			386200	1.66791	92902.5	1
			693636	3.46621	302022	1
			673932	4.98882	759091	1
			574303	3.28867	370357	1
			599070	3.11362	295308	1
			441826	3.17829	471127	1
			866052	4.20665	342295	1
			689575	3.62579	351922	1
			434910	3.35707	529399	1
			532934	2.9452	313065	1
			435907	3.61443	602327	1
			530598	4.665	809408	1
			417447	3.05911	461275	1
			557256	3.76076	523012	1
			598911	3.92021	527157	1
			487602	3.58775	542967	1
			765988	3.57647	261341	1
			534190	3.43663	452972	1
			413624	4.09397	762358	1
			305675	3.44086	682702	1
			580271	4.07167	589303	1
			444516	3.42429	539100	1
			559328	3.30505	390039	1
			477646	4.38726	782581	1
			458639	4.203	748660	1
			712645	4.80761	668327	1
			584814	3.28058	357523	1
			688230	4.314	550955	1
			674995	3.38916	298532	1
			425430	3.84355	678618	1
			732785	4.26582	492560	1
			518385	2.96572	333510	1
			622017	4.31781	618260	1
			497958	3.56164	525112	1
			628147	3.79344	461506	1
			790747	4.1246	394033	1
			464310	3.8611	644781	1
			726549	3.73776	347111	1
			500983	3.98677	644204	1
			837115	2.86647	-13730.7	0
			546061	3.34274	414131	1
			348005	3.27045	591421	1
			489148	3.26859	449746	1
			547322	4.14317	642792	1
			423448	2.95321	424851	1
			600919	3.79654	489625	1
			712097	4.16924	485505	1
			676522	4.3711	579063	1
			365117	2.24873	280823	1
			645628	3.65919	405462	1
			302439	2.92026	536399	1
			516614	4.5836	800010	1
			551919	5.42548	1.00654e+06	1
			772634	3.11465	122038	1
			405422	3.50313	600842	1
			760790	4.18989	442743	1
			541061	3.45346	450935	1
			473796	3.42088	508840	1
			481630	3.3407	477975	1
			695792	4.57929	619594	1
			767789	3.62617	273818	1
			745859	3.04276	128164	1
			664436	3.73167	407476	1
			801487	4.10611	377979	1
			628904	3.77442	455288	1
			794857	4.21207	415049	1
			689513	3.02798	180265	1
			670192	4.40146	594114	1
			507568	3.50325	498730	1
			838319	3.97059	302221	1
			765834	2.71973	15400.3	1
			417491	3.32076	536386	1
			536626	3.3835	435276	1
			500835	3.77711	584129	1
			524602	3.66929	529390	1
			466288	4.03909	693928	1
			719860	4.30524	516808	1
			680146	2.8593	141180	1
			309953	3.80468	782930	1
			676111	3.61476	362219	1
			468708	3.96764	670986	1
			365362	4.83073	1.02225e+06	1
			755430	4.02051	399449	1
			387876	4.20496	819987	1
			528448	3.47081	468531	1
			444527	4.56986	868153	1
			476541	2.88475	352095	1
			559509	4.25982	664113	1
			559008	4.34604	689380	1
			765457	4.2788	463614	1
			560604	3.19112	356034	1
			345812	3.07444	537311	1
			693381	2.66549	72274.6	1
			412814	3.15155	492460	1
			525670	4.12743	659921	1
			823275	3.54854	196032	1
			606203	3.5243	406143	1
			621549	3.43445	364987	1
			523743	3.71607	543688	1
			630966	3.83486	470586	1
			740170	3.46637	255535	1
			363626	4.62125	963813	1
			571214	3.7171	496511	1
			289462	3.31982	664146	1
			520613	3.16437	388343	1
			469493	3.16534	439741	1
			475914	3.81885	621039	1
			516125	3.27495	424594	1
			455945	3.19848	462808	1
			543928	3.68992	515992	1
			652272	3.78805	435834	1
			708613	3.16069	199287	1
			887337	2.10632	-282302	0
			484419	3.21542	439202	1
			529994	3.57479	496854	1
			596609	2.85409	223221	1
			668869	2.84854	149367	1
			675746	5.14824	803071	1
			645588	4.51493	651313	1
			323005	3.83977	779957	1
			709114	4.69017	638122	1
			814103	3.50971	194052	1
			615363	3.12605	282584	1
			374615	3.10258	516592	1
			526382	3.70516	537914	1
			647172	3.80173	444864	1
			327090	4.24945	893551	1
			455689	4.0225	699760	1
			648077	3.01736	218651	1
			810670	3.79795	280281	1
			424054	4.91002	986335	1
			750987	3.22667	175864	1
			559804	3.26899	379205	1
			643856	3.07348	238993	1
			607186	3.04435	267295	1
			697683	4.00697	453307	1
			364872	3.33055	591820	1
			791978	2.78367	7621.95	1
			995942	4.02414	159979	1
			648395	3.6702	405859	1
			679087	2.96748	173312	1
			583407	2.90864	252092	1
			943978	4.00113	205335	1
			524215	3.37597	445522	1
			623100	4.54537	682545	1
			341667	3.25827	594262	1
			818940	4.26574	406380	1
			514324	4.18149	686798	1
			385693	3.43365	600614	1
			647779	3.26887	291193	1
			684348	4.50736	610376	1
			551505	3.9178	573871	1
			578209	4.13732	610224	1
			435469	3.30064	512629	1
			550698	3.16528	358520	1
			496163	2.99428	363934	1
			844064	4.30882	393630	1
			613776	4.28315	616547	1
			671778	2.91108	164420	1
			472785	3.46812	523423	1
			265447	3.86795	845611	1
			659844	3.44162	328752	1
			543860	3.22887	383622	1
			503365	4.02111	651688	1
			611737	3.59662	421381	1
			560981	3.7017	502321	1
			534140	3.9866	611000	1
			627618	3.59106	403904	1
			779726	3.43262	206284	1
			740951	3.41605	240298	1
			770814	4.71714	584169	1
			492952	4.44918	785061	1
			547560	3.57628	479716	1
			541413	3.23231	387058	1
			588333	3.92576	539329	1
			598450	3.83065	501893	1
			371191	4.30707	866004	1
			738453	3.64471	308478	1
			756458	3.85312	350338	1
			698441	3.45629	294368	1
			651087	3.72636	419297	1
			366745	3.3473	594755	1
			529419	2.95656	319845	1
			689957	3.46012	303951	1
			470125	4.20718	738374	1
			641055	4.51181	654949	1
			812743	4.03926	347523	1
			839825	3.45519	152668	1
			648112	2.7385	138514	1
			586930	4.2168	624333	1
			558418	3.44424	430929	1
			596878	4.04299	564458	1
			641539	3.14176	260923	1
			924475	3.62489	116763	1
			486669	5.11277	981959	1
			689604	3.65837	361250	1
			406771	4.25934	816712	1
			602413	3.75369	475823	1
			477576	3.29035	467567	1
			552965	4.57611	761509	1
			518381	3.28922	426439	1
			650135	3.65367	399370	1
			467087	3.71527	600112	1
			371863	4.10679	807801	1
			275072	4.13287	912083	1
			442786	3.55013	576977	1
			515702	2.80602	290319	1
			477540	3.78997	611116	1
			780186	3.15128	125011	1
			426842	3.76223	653848	1
			722790	3.66038	328644	1
			764373	3.56866	260713	1
			713287	4.74685	650232	1
			699695	2.17391	-75246.9	0
			521454	4.47801	764840	1
			596871	2.7722	199435	1
			381891	4.76963	988172	1
			775065	3.58867	255771	1
			625510	3.79731	465255	1
			704053	3.89668	415256	1
			466606	3.87547	646612	1
			536020	3.85292	570720	1
			743474	3.65507	306434	1
			473977	3.43555	512873	1
			809088	3.81225	285970	1
			622819	4.55189	684698	1
			381436	4.64067	951582	1
			805284	3.3437	155184	1
			506853	3.69209	553690	1
			556012	3.51581	453894	1
			620138	4.5366	682988	1
			725992	2.03154	-142439	0
			207702	2.98117	648630	1
			473684	3.43856	514032	1
			810157	4.86651	587735	1
			631565	2.72728	151837	1
			637561	4.62702	691538	1
			427913	3.47566	570459	1
			543713	3.50371	462718	1
			703220	3.74798	373375	1
			680706	4.1305	505768	1
			616427	3.44579	373366	1
			601310	3.05882	277326	1
			543315	4.1464	647725	1
			599265	3.81286	495968	1
			427520	3.48461	573423	1
			917471	3.00754	-53564.5	0
			553009	3.52481	459483	1
			645807	3.56071	376995	1
			344620	5.02299	1.09822e+06	1
			706260	4.28418	524359	1
			446796	3.00783	417193	1
			604814	3.85221	501723	1
			386610	3.21339	536427	1
			613628	3.66013	437735	1
			425799	4.57669	888843	1
			417095	2.91066	418983	1
			781751	2.56299	-45540.4	0
			576511	2.37926	106925	1
			522311	4.71544	832185	1
			675337	4.42989	597137	1
			779175	3.84776	326083	1
			730264	3.10815	162542	1
			805991	2.82823	6409.41	1
			722540	3.96363	416000	1
			630588	3.61282	407184	1
			624528	4.53399	677846	1
			836306	3.42874	148590	1
			577913	3.9959	569896	1
			611439	4.74086	750359	1
			689454	4.76035	677942	1
			442874	3.29961	504928	1
			434387	3.36548	532339	1
			429216	3.32519	525937	1
			669950	2.64409	89557.6	1
			570668	4.01228	581849	1
			679745	3.37106	288581	1
			440492	3.22063	484623	1
			387788	3.75487	690785	1
			700456	3.27068	239038	1
			547169	3.57228	478958	1
			637451	4.67773	706214	1
			419291	3.96838	720615	1
			652068	4.82058	732630	1
			513718	3.03411	357822	1
			530353	3.89221	587673	1
			681602	3.99944	467224	1
			525152	4.4193	744278	1
			767126	3.46944	229460	1
			768439	4.01024	383489	1
			751273	3.98594	393675	1
			410385	3.92595	717332	1
			780309	4.04915	382797	1
			768063	3.89113	349652	1
			878892	3.37794	91411.6	1
			691498	4.18894	511762	1
			391152	3.40857	587950	1
			743555	4.20782	465129	1
			439255	4.29445	794314	1
			557873	3.44394	431387	1
			612121	3.77477	472169	1
			357650	3.48929	644638	1
			779402	3.37602	190350	1
			548428	3.05391	328799	1
			506591	3.48095	493301	1
			698154	4.06746	470211	1
			776412	3.33293	180962	1
			487641	4.76737	881773	1
			884545	3.14483	18797.6	1
			871707	4.04909	291380	1
			270692	3.84627	834138	1
			540047	3.28426	403348	1
			587565	3.66612	465516	1
			644514	4.06074	521922	1
			562359	3.13833	339117	1
			468740	3.90473	652883	1
			729391	2.87174	95506.4	1
			499539	4.45846	781141	1
			540832	4.45976	740222	1
			263399	3.49496	740518	1
			600783	2.79518	202123	1
			730523	3.4588	263007	1
			549985	3.47404	447921	1
			748603	3.33846	210359	1
			423388	4.22998	791660	1
			581005	3.4221	401984	1
			737774	5.06205	716284	1
			754585	4.09325	421188	1
			777455	3.17132	133497	1
			447858	4.75526	918075	1
			883561	4.47859	402900	1
			754211	2.64663	6026.85	1
			978699	4.06568	189156	1
			604930	4.09466	571247	1
			709055	2.77475	87983.7	1
			474743	3.56531	549383	1
			750131	3.18286	164136	1
			517725	4.41254	749762	1
			722009	4.11337	459543	1
			438695	2.91621	398977	1
			419368	4.18462	782652	1
			317994	4.68364	1.02737e+06	1
			630625	3.74995	446537	1
			426533	4.9513	995713	1
			921856	3.92912	206772	1
			542527	3.11439	352072	1
			651852	3.19569	266101	1
			753214	4.21261	456846	1
			447012	3.32696	508646	1
			602016	4.70398	749189	1
			511087	3.20605	409841	1
			450838	4.51642	846489	1
			603175	2.83649	211597	1
[truncated: 8,001 more rows]
