# Supplementary material for: Efficacy and Cost-Effectiveness of VATS Versus Chest Tube Drainage in First-Episode Primary Spontaneous Pneumothorax With Blebs: A Propensity Score-Matched Retrospective Study
Source: Research Square preprint supplement (doi:10.21203/rs.3.rs-7363743/v1), 2025-08-18
Supplement: Supplementary file 2 [file d211e391a7a17c9bb791bb15.xlsx]

## Sheet: PSM algorithm details
Case Control Matching Statisticsa
Match Type	Count
Demander Cases	188
Supplier Cases	57
Matches	33
Unmatched	155
Sampling	without replacement
Log file	none
Demander Queue Limit	189
a. Match variables: PS
Case Control Match Tolerances
Match Variables	Value	Fuzzy Match Tries	Incremental Rejection Percentage
Exact (All Variables)	.	2166	98.753
PS	0.02	2139	96.307
Tries is the number of match comparisons before drawing. Rejection percentage shows the match rejection rate. Rejections are attributed to the first variable in the BY list that causes rejection.
Distribution of Available Matches
Count	Count
0	155
1	12
45698	21
45981	0
21 - 30	0
31 - 40	0
41 - 50	0
51 - 60	0
61 - 70	0
71 - 80	0
81 - 90	0
91 - 100	0
> 100	0
Average matching cases available: 0.41

## Sheet: Baseline characteristics
Baseline Characteristics Before and After Propensity Score Matching
Variables	Before Matching		After Matching		Statistical Analysis	SMD
	Chest Tube (n=57)	VATS (n=188)	Chest Tube (n=33)	VATS (n=33)	Pre-Match Test	Pre-Match vs. Post-Match
					Post-Match Test
Categorical Variables
Sex
Male	46(80.7%)	161(85.6%)	28(84.8%)	28(84.8%)	X²=0.813, P=0.404	0.131 vs. 0
Female	11(19.3%)	27(14.4%)	5(15.2%)	5(15.2%)	P=1.000 (Kappa=0.057, P=0.743)
Age
<45 years old	21(36.8%)	161(85.6%)	16(48.5%)	16(48.5%)	X²=54.52, P<0.001	0.725 vs. 0
≥45 years old	36(63.2%)	27(14.4%)	17(51.5%)	17(51.5%)	P=1.000 (Kappa=0.757, P<0.001)
Smoking state
No	23(40.4%)	136(72.3%)	11(33.3%)	15(45.5%)	X²=19.648, P<0.001	0.679 vs. 0.252
Yes	34(59.6%)	52(27.7%)	22(66.7%)	18(54.5%)	P=0.125 (Kappa=0.750, P<0.001)
The laterality of PSP
Left	22(38.6%)	83(44.1%)	13(39.4%)	17(51.5%)	X²=0.551, P=0.542	0.112 vs. 0.245
Right	35(61.4%)	105(55.9%)	20(60.6%)	16(48.5%)	P=0.453 (Kappa=0.036, P=0.829)
Degree of lung collapse volume
30%-50%	26(45.6%)	93(49.5%)	14(42.4%)	12(36.4%)	X²=0.26, P=0.652	0.078 vs. 0.123
>50%	31(54.4%)	95(50.5%)	19(57.6%)	21(63.6%)	P=0.754 (Kappa=0.368, P=0.033)
Maximum blebs diameter
<1 cm	10(17.5%)	127(67.6%)	8(24.2%)	10(30.3%)	Fisher's exact P<0.001	1.175 vs. 0.137
1-5 cm	36(63.2%)	59(31.4%)	23(69.7%)	21(63.6%)	P=0.157 (Kappa=0.874, P<0.001)	0.672 vs. 0.130
>5 cm	11(19.3%)	2(1.1%)	2(6.1%)	2(6.1%)		0.631 vs. 0
Number of blebs
1-2	19(33.3%)	163(86.7%)	16(48.5%)	16(48.5%)	X²=70.661, P<0.001	1.300 vs. 0
3-5	21(36.8%)	20(10.6%)	13(39.4%)	13(39.4%)	P=1.000 (Kappa=0.796, P<0.001)	0.648 vs. 0
>5	17(29.8%)	5(2.7%)	4(12.1%)	4(12.1%)		0.790 vs. 0
Complications
Combined with complications	20(35.1%)	47(25.0%)	13(39.4%)	12(36.4%)	X²=2.240, P=0.174	-
No complications	37(64.9%)	141(75.0%)	20(60.6%)	21(63.6%)	P=1.000 (Kappa=0.164, P=0.346)
Status of recurrence
Recurrence	26(45.6%)	22(11.7%)	16(48.5%)	4(12.1%)	X²=31.930, P<0.001	-
No recurrence	31(54.4%)	166(88.3%)	17(51.5%)	29(87.9%)	P=0.004 (Kappa=0.008, P=0.948)
Continuous Variables
Age(years)	53(41-62)	28(21-37)	50(28.5-59.5)	46(26-57.5)	U=2,041, P<0.001	-
					t=-0.966, P=0.341
Length of hospital stay (days)	7(4.5-10.5)	8(6-10)	7(4-10.5)	8(7-10.5)	U=4,291, P=0.022	-
					Z=-2.032, P=0.042
Time to recurrence (months)	15(2-60)	60(60-60)	15(2-60)	60(60-60)	U=2,709, P<0.001	-
					Z=-3.590, P<0.001
Total cost (¥)	6,218(3,791-9,100)	25,247(20,656-28,766)	6,256(3,769-9,306)	26,922(23,455-33,206)	U=1212, P<0.001	-
					t=7.944, P<0.001
Abbreviations: IQR, Interquartile range; PSP, Primary spontaneous pneumothorax; SMD, Standardized mean difference; VATS, Video-assisted thoracoscopic surgery.
Data presented as n (%) for categorical variables and median (IQR) for continuous variables.
Propensity score matching (1:1, caliper = 0.02) achieved negligible imbalance (mean SMD: 0.631→0.081). Pre-matching p-values from Chi-square test, Fisher’s exact test and Mann-Whitney U test. Post-matching p-values from McNemar test, Bowker’s test, Paired t-test and Wilcoxon signed-rank test.
